# Supplementary material for: Transient directing group controlled regiodivergent C(sp3)–H and C(sp2)–H polyfluoroalkoxylation of aromatic aldehydes
Source: Royal Society of Chemistry journal article supplement (doi:10.1039/d1qo00895a), 2021-01-01

## Supporting Information

### Transient Directing Groups Controlled Regiodivergent C(sp<sup>3</sup>)-H and C(sp<sup>2</sup>)-H Polyfluoroalkoxylation of Aromatic Aldehydes

Jiayu Zhou, Dan Liu, Chaolumen Bai, Agula Bao, Tegshi Muschin, Menghe Baiyin  
and Yong-Sheng Bao\*

College of Chemistry and Environmental Science, Inner Mongolia Key Laboratory of Green  
catalysis, Inner Mongolia Normal University, Hohhot, 010022, China

\*(Y.B.) E-mail: sbbys197812@163.com

## Contents

|                                                                                                    |            |
|----------------------------------------------------------------------------------------------------|------------|
| <b>1. Chemicals</b>                                                                                | <b>S2</b>  |
| <b>2. Characterization techniques</b>                                                              | <b>S2</b>  |
| <b>3. GC-MS Analysis of Reaction of 1a via C(sp<sup>3</sup>)-H functionalization</b>               | <b>S2</b>  |
| <b>4. GC-MS Analysis of Reaction of 1a via C(sp<sup>2</sup>)-H functionalization</b>               | <b>S4</b>  |
| <b>5. Characterization Data for the Products</b>                                                   | <b>S6</b>  |
| <b>6. <sup>1</sup>H NMR, <sup>13</sup>C NMR, <sup>19</sup>F NMR and MS Spectra of the Products</b> | <b>S14</b> |



baoyongsheng20210107-1 #1285 RT: 4.32 AV: 1 AV: 5 SB: 12 1278-1283 1287-1292 NL: 2.59E8  
F: + c Full ms [50.00-650.00]

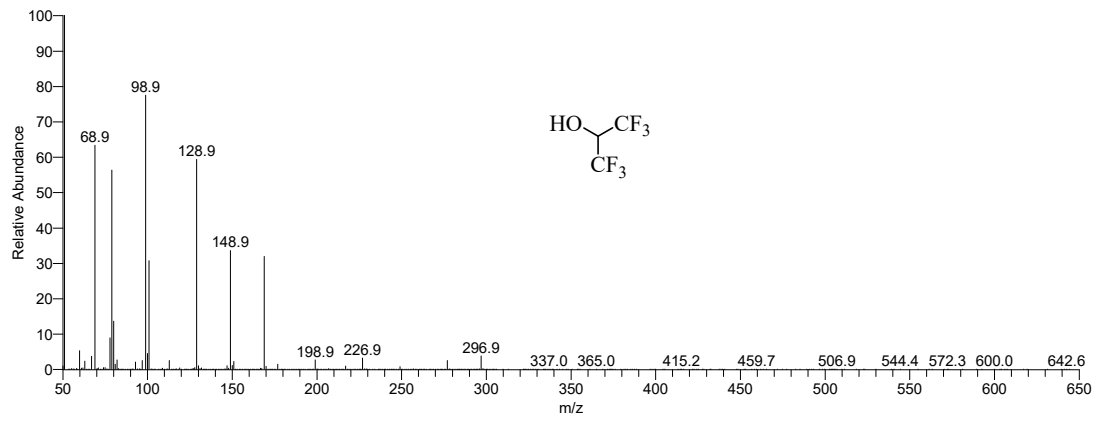

baoyongsheng20210107-1 #1688 RT: 5.64 AV: 1 AV: 5 SB: 12 1681-1686 1690-1695 NL: 1.12E6  
F: + c Full ms [50.00-650.00]

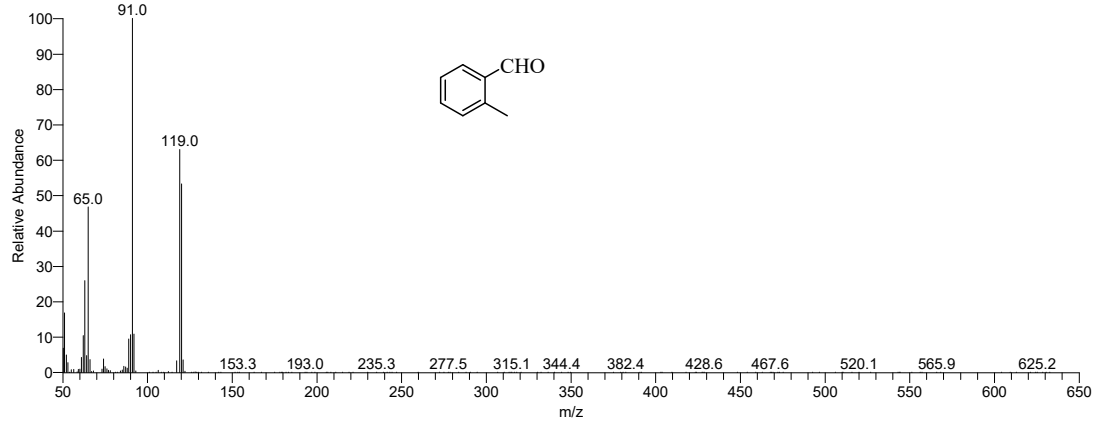

baoyongsheng20210107-1 #1839 RT: 6.14 AV: 1 AV: 5 SB: 12 1832-1837 1841-1846 NL: 1.02E7  
F: + c Full ms [50.00-650.00]

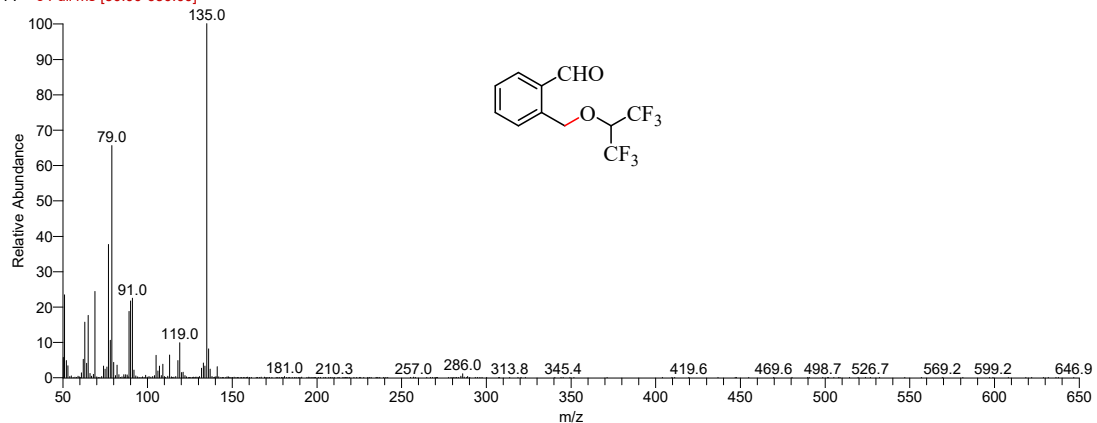

baoyongsheng20210107-1 #2032 RT: 6.78 AV: 1 AV: 5 SB: 12 2025-2030 2034-2039 NL: 2.01E5  
F: + c Full ms [50.00-650.00]

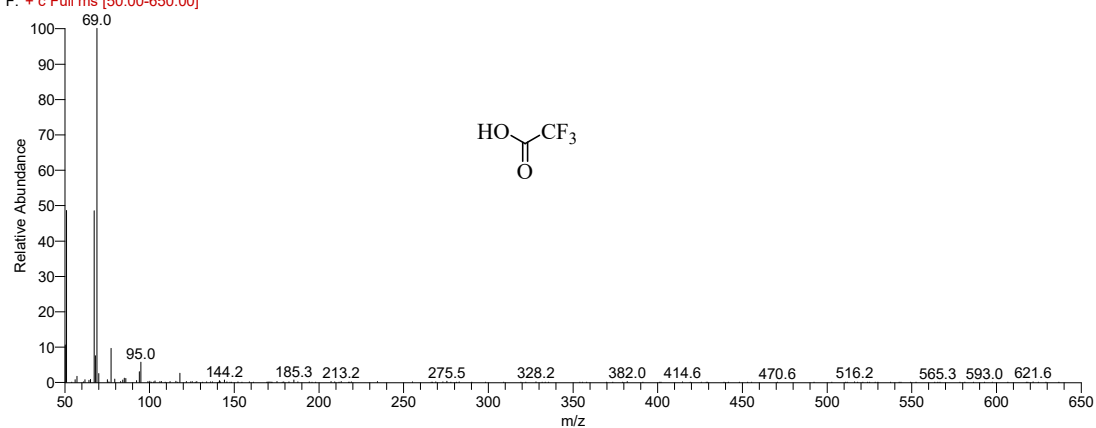

baoyongsheng20210107-1 #2574 RT: 8.57 AV: 1 AV: 5 SB: 12 2567-2572 2576-2581 NL: 2.26E6  
F: + c Full ms [50.00-650.00]

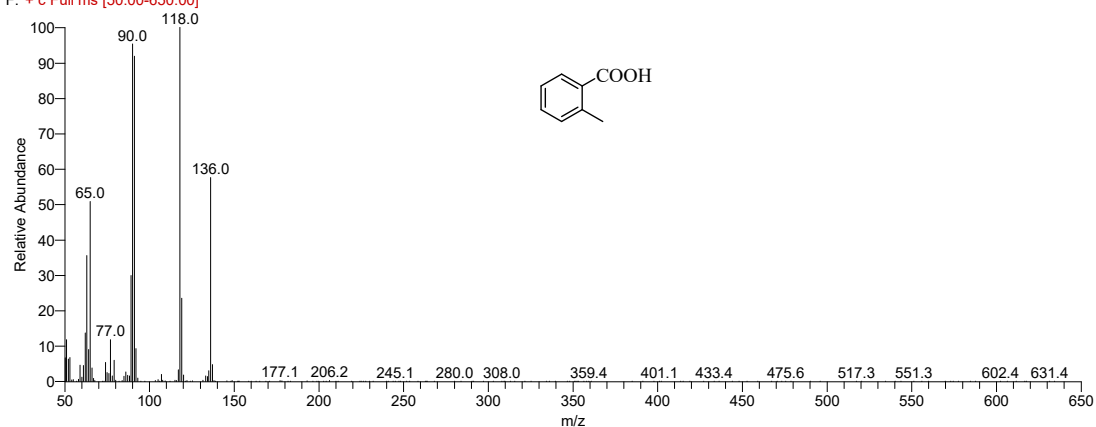

#### 4. GC-MS Analysis of Reaction of 1a via C(sp<sup>2</sup>)-H functionalization

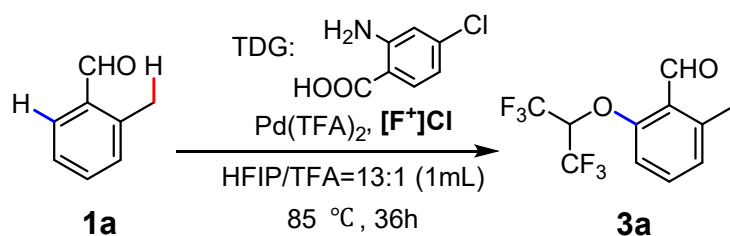

RT: 3.00 - 8.50

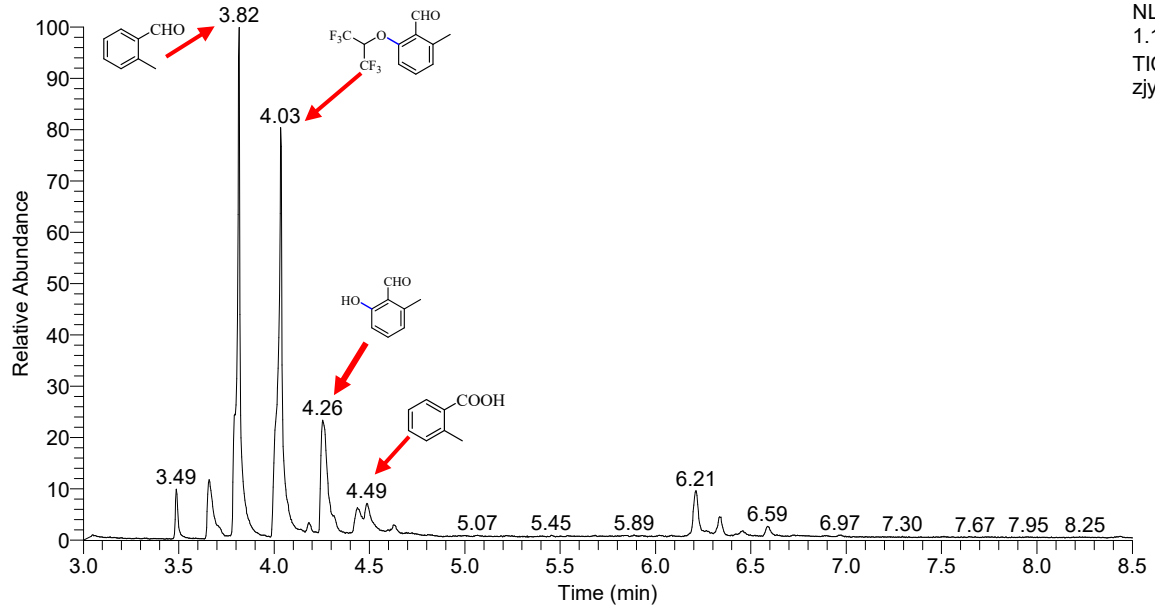

NL:  
1.19E8  
TIC MS  
zjy-1

zjy-1 #1132 RT: 3.81 AV: 1 AV: 5 SB: 12 1125-1130 1134-1139 NL: 1.85E7  
F: + c Full ms [50.00-650.00]

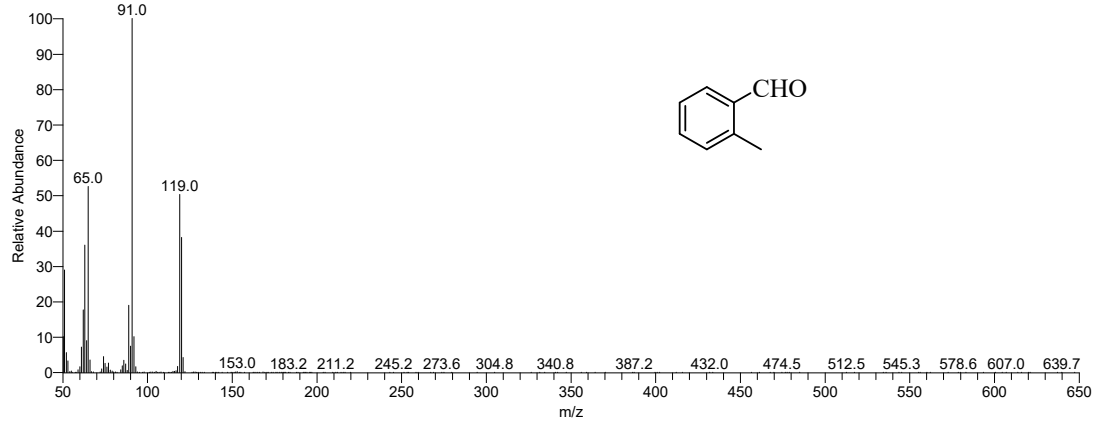

zjy-1 #1198 RT: 4.03 AV: 1 AV: 5 SB: 12 1191-1196 1200-1205 NL: 6.83E6  
F: + c Full ms [50.00-650.00]

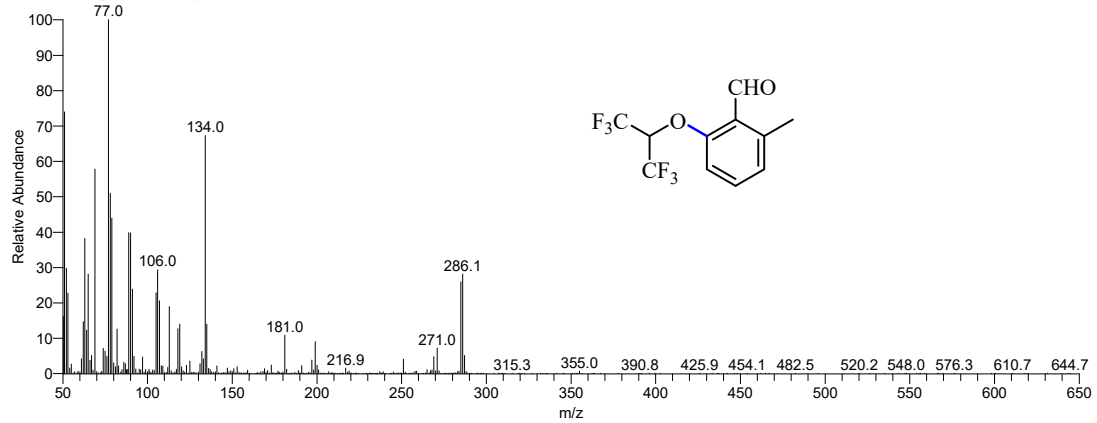

zjy-1 #1267 RT: 4.26 AV: 1 AV: 5 SB: 12 1260-1265 1269-1274 NL: 3.72E6  
F: + c Full ms [50.00-650.00]

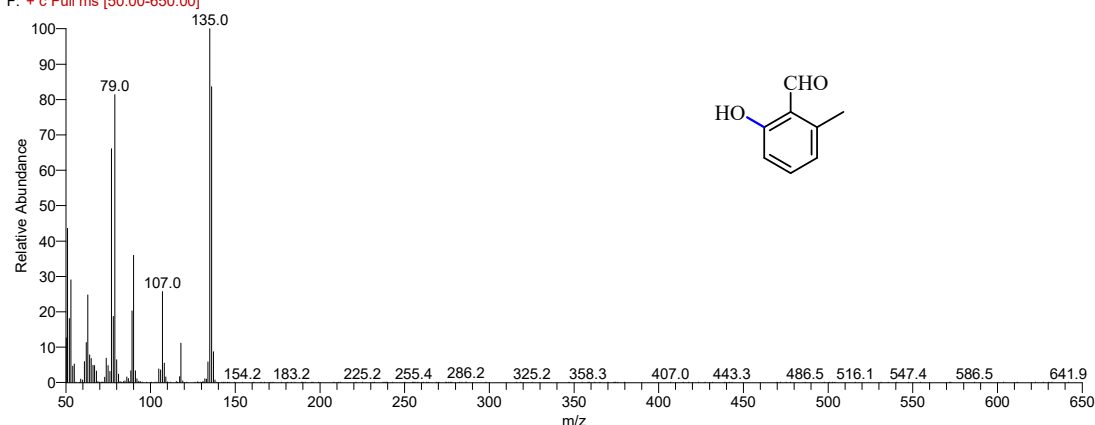

zjy-1 #1322 RT: 4.44 AV: 1 AV: 5 SB: 12 1315-1320 1324-1329 NL: 9.12E5  
F: + c Full ms [50.00-650.00]

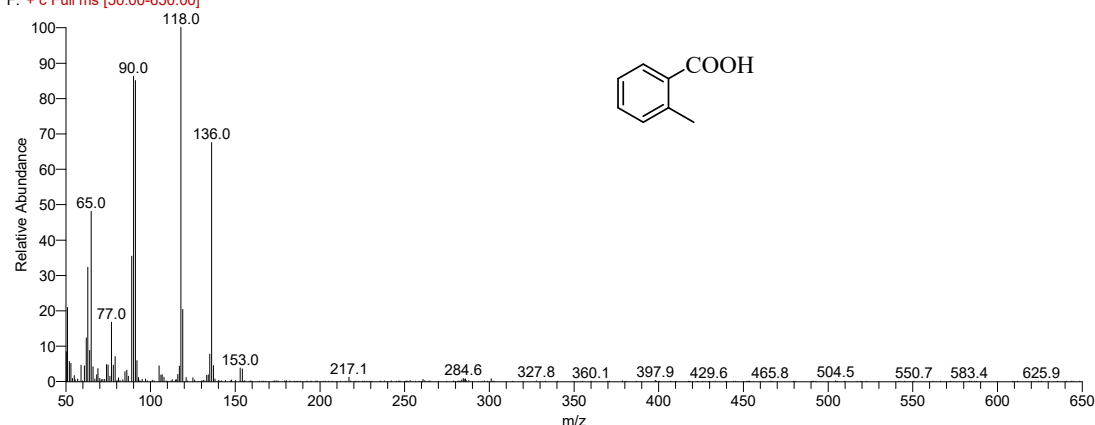

## 5. Characterization Data for the Products

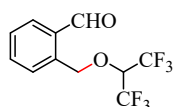

2-(((1,1,1,3,3,3-hexafluoropropan-2-yl)oxy)methyl)benzaldehyde **2a**. yield:74% (M=286.17 , 21.2mg).  $^1\text{H}$  NMR (600 MHz,  $\text{CDCl}_3$ )  $\delta$  10.11 (s, 1H), 7.87 (d,  $J = 7.5, 1.1$  Hz, 1H), 7.72 (d,  $J = 7.7$  Hz, 1H), 7.67 (t,  $J = 7.6, 1.3$  Hz, 1H), 7.57 (t,  $J = 11.0, 3.9$  Hz, 1H), 5.35 (s, 2H), 4.39-4.34 (m,  $J = 11.9, 5.9$  Hz, 1H);  $^{13}\text{C}$  NMR (151 MHz,  $\text{CDCl}_3$ )  $\delta$  193.2, 137.4, 134.5, 134.2, 132.9, 128.6, 128.1, 121.6 (q,  $J = 285.6$  Hz, 2C), 76.3 (sept,  $J = 32.4$  Hz, 1C), 73.9;  $^{19}\text{F}$  NMR (565 MHz,  $\text{CDCl}_3$ )  $\delta$  -73.77, -73.78; Anal. Calcd. For  $\text{C}_{11}\text{H}_8\text{F}_6\text{O}_2$ : C, 46.17; H, 2.82%. Found: C, 46.11; H, 2.81%; MS (EI) m/z (%) 286.0( $\text{M}^+$ , 2), 135.0(100), 119.0(14), 105.0(7), 79.0(58),65.0(21).

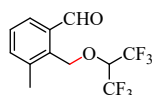

2-(((1,1,1,3,3,3-hexafluoropropan-2-yl)oxy)methyl)-3-methylbenzaldehyde **2b**. yield:46% (M=300.20, 13.9mg).  $^1\text{H}$  NMR (600 MHz,  $\text{CDCl}_3$ )  $\delta$  10.16 (s, 1H), 7.72-7.62 (m, 1H), 7.55-7.44 (m, 2H), 5.37 (s, 2H), 4.50-4.39 (m, 1H), 2.49 (s, 3H);  $^{13}\text{C}$  NMR (151 MHz,  $\text{CDCl}_3$ )  $\delta$  193.2, 140.7, 136.3, 135.0, 133.5, 132.0, 129.6, 121.6 (q,  $J = 282.3$  Hz, 2C), 75.5 (sept,  $J = 32.3$  Hz, 1C), 67.8, 18.9; Anal. Calcd. For

C<sub>12</sub>H<sub>10</sub>F<sub>6</sub>O<sub>2</sub>: C, 48.01; H, 3.36%. Found: C, 48.06; H, 3.35%; MS (EI) m/z (%) 300.1(M<sup>+</sup>, 5), 149.1(100), 133.1(13), 91.0(36), 77.0(44).

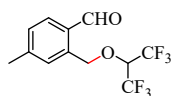

2-(((1,1,1,3,3,3-hexafluoropropan-2-yl)oxy)methyl)-4-methylbenzaldehyde **2c**. yield: 62% (M=300.20, 18.6mg). <sup>1</sup>H NMR (600 MHz, CDCl<sub>3</sub>) δ 10.04 (s, 1H), 7.74 (d, *J* = 7.7 Hz, 1H), 7.49 (s, 1H), 7.35 (d, *J* = 7.6 Hz, 1H), 5.32 (s, 2H), 4.43 – 4.30 (m, 1H), 2.47 (s, 3H); <sup>13</sup>C NMR (151 MHz, CDCl<sub>3</sub>) δ 192.7, 145.5, 137.3, 134.9, 130.7, 129.1, 121.6 (q, *J* = 283.2 Hz, 2C), 76.2 (sept, *J* = 32.3 Hz, 1C), 73.9, 22.0; Anal. Calcd. For C<sub>12</sub>H<sub>10</sub>F<sub>6</sub>O<sub>2</sub>: C, 48.01; H, 3.36%. Found: C, 48.03; H, 3.34%; MS (EI) m/z (%) 300.1(M<sup>+</sup>, 3), 149.1(100), 133.1(11), 119.1(6), 91.1(34), 77.0(41).

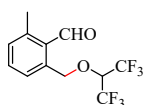

2-(((1,1,1,3,3,3-hexafluoropropan-2-yl)oxy)methyl)-6-methylbenzaldehyde **2d**. yield: 45% (M=300.20, 13.5mg). <sup>1</sup>H NMR (600 MHz, CDCl<sub>3</sub>) δ 10.58 (s, 1H), 7.52 (dt, *J* = 15.1, 7.6 Hz, 2H), 7.27 (s, 1H), 5.26 (s, 2H), 4.39-4.29 (m, 1H), 2.70 (s, 3H); <sup>13</sup>C NMR (151 MHz, CDCl<sub>3</sub>) δ 192.9 (d, *J* = 10.3 Hz, 1C), 142.2, 137.9, 133.8, 131.8, 131.0, 126.2, 121.5 (d, *J* = 278.6 Hz, 2C), 76.1 ((sept, *J* = 32.4 Hz, 1C), 74.6, 19.7; Anal. Calcd. For C<sub>12</sub>H<sub>10</sub>F<sub>6</sub>O<sub>2</sub>: C, 48.01; H, 3.36%. Found: C, 48.00; H, 3.37%; MS (EI) m/z (%) 300.1(M<sup>+</sup>, 5), 149.1(100), 132.1(19), 91.0(43), 77.0(56).

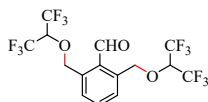

2,6-bis(((1,1,1,3,3,3-hexafluoropropan-2-yl)oxy)methyl)benzaldehyde **2d'**. yield: 20% (M=466.04, 9.3mg). <sup>1</sup>H NMR (600 MHz, CDCl<sub>3</sub>) δ 10.51 (s, 1H), 7.73-7.60 (m, 3H), 5.28 (s, 4H), 4.33-4.23 (m, 2H); <sup>13</sup>C NMR (151 MHz, CDCl<sub>3</sub>) δ 191.7, 138.4, 133.9, 131.0, 129.8 (2C), 121.6 (q, *J* = 282.3 Hz, 2C), 75.6 (sept, *J* = 32.6 Hz, 1C), 73.9; Anal. Calcd. For C<sub>15</sub>H<sub>10</sub>F<sub>12</sub>O<sub>3</sub>: C, 38.64; H, 2.16%. Found: C, 38.60; H, 2.18%; MS (EI) m/z (%) 298.1(5), 147.1(100), 119.1(24), 91.0(57), 69.0(22).

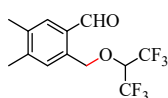

2-(((1,1,1,3,3,3-hexafluoropropan-2-yl)oxy)methyl)-4,5-dimethylbenzaldehyde **2e**. yield: 51% (M=314.23, 16mg). <sup>1</sup>H NMR (600 MHz, CDCl<sub>3</sub>) δ 10.04 (s, 1H), 7.60 (s, 1H), 7.40 (s, 1H), 5.27 (s, 2H), 4.39-4.28 (m, 1H), 2.37 (s, 3H), 2.36 (s, 3H); <sup>13</sup>C NMR (151 MHz, CDCl<sub>3</sub>) δ 192.8, 144.0, 137.3, 135.7, 134.5, 131.2, 130.3, 121.6 (q, *J* = 283.4 Hz, 2C), 76.0 (sept, *J* = 32.4 Hz, 1C), 73.6, 20.2, 19.3; Anal. Calcd. For C<sub>13</sub>H<sub>12</sub>F<sub>6</sub>O<sub>2</sub>: C, 49.69; H, 3.85%. Found: C, 49.63; H, 3.88%; MS (EI) m/z (%) 314.1(M<sup>+</sup>, 2), 163.1(100), 147.1(8), 107.0(73), 91.0(55), 69.0(24).

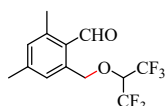

2-(((1,1,1,3,3,3-hexafluoropropan-2-yl)oxy)methyl)-4,6-dimethylbenzaldehyde **2f**. yield: 43% (M=314.23, 13.4mg). <sup>1</sup>H NMR (600 MHz, CDCl<sub>3</sub>) δ 10.51 (s, 1H), 7.32 (s, 1H), 7.07 (s, 1H), 5.24 (s, 2H), 4.40 – 4.30 (m, 1H), 2.65 (s, 3H), 2.40 (s, 3H); <sup>13</sup>C NMR (151 MHz, CDCl<sub>3</sub>) δ 192.4, 144.9, 142.5, 138.1, 132.4, 128.5, 127.0, 121.6 (d, *J* = 282.2 Hz, 2C), 76.1 (sept, *J* = 32.3 Hz, 1C), 74.7, 21.8, 19.6;

Anal. Calcd. For  $C_{13}H_{12}F_6O_2$ : C, 49.69; H, 3.85%. Found: C, 49.67; H, 3.83%; MS (EI)  $m/z$  (%) 314.1( $M^+$ , 5), 163.1(100), 147.1(11), 117.1(27), 91.0(46), 77.0(23).

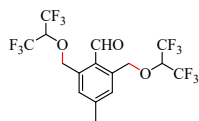

2,6-bis(((1,1,1,3,3,3-hexafluoropropan-2-yl)oxy)methyl)-4-methylbenzaldehyde **2f**. yield:15% ( $M=480.06$ , 7.2mg).  $^1H$  NMR (600 MHz,  $CDCl_3$ )  $\delta$  10.44 (s, 1H), 7.42 (s, 2H), 5.24 (s, 4H), 4.31-4.23 (m, 2H), 2.48 (s, 3H);  $^{13}C$  NMR (151 MHz,  $CDCl_3$ )  $\delta$  191.3, 145.3, 138.6, 130.5, 128.5, 121.4 (q,  $J = 285.9$  Hz, 2C), 75.5 (sept,  $J = 32.6$  Hz, 1C), 74.0, 21.9; Anal. Calcd. For  $C_{16}H_{12}F_{12}O_3$ : C, 40.02; H, 2.52%. Found: C, 40.05; H, 2.51%; MS (EI)  $m/z$  (%) 312.2(8), 161.1(100), 133.1(25), 105.1(31), 69.0(14).

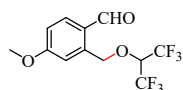

2-(((1,1,1,3,3,3-hexafluoropropan-2-yl)oxy)methyl)-4-methoxybenzaldehyde **2g**. yield:71%. ( $M=316.20$ , 22.4mg).  $^1H$  NMR (600 MHz,  $CDCl_3$ )  $\delta$  9.93 (s, 1H), 7.78 (d,  $J = 8.5$  Hz, 1H), 7.25 (s, 1H), 6.99 (dd,  $J = 8.4, 2.3$  Hz, 1H), 5.36 (s, 2H), 4.43-4.31 (m, 1H), 3.92 (s, 3H);  $^{13}C$  NMR (151 MHz,  $CDCl_3$ )  $\delta$  191.7, 164.3, 140.4, 137.6, 126.2, 121.5 (q,  $J = 285.9$  Hz, 2C), 113.6, 112.7, 76.4 (sept,  $J = 32.4$  Hz, 1C), 74.0, 55.6; Anal. Calcd. For  $C_{12}H_{10}F_6O_3$ : C, 45.58; H, 3.19%. Found: C, 45.56; H, 3.18%; MS (EI)  $m/z$  (%) 316.0( $M^+$ , 3), 165.0(100), 149.0(11), 109.0(56), 91.0(18), 77.0(42).

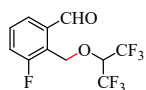

2-(((1,1,1,3,3,3-hexafluoropropan-2-yl)oxy)methyl)-3-fluorobenzaldehyde **2h**. yield:56% ( $M=304.16$ , 17.0mg).  $^1H$  NMR (600 MHz,  $CDCl_3$ )  $\delta$  10.21 (s, 1H), 7.72 (d,  $J = 7.6$  Hz, 1H), 7.60 (td,  $J = 7.9, 5.3$  Hz, 1H), 7.40 (t,  $J = 8.7$  Hz, 1H), 5.34 (s, 2H), 4.45-4.33 (m, 1H);  $^{13}C$  NMR (151 MHz,  $CDCl_3$ )  $\delta$  191.2 (d,  $J = 3.1$  Hz, 1C), 161.7 (d,  $J = 251.5$  Hz, 1C), 136.2 (d,  $J = 2.5$  Hz, 1C), 131.5 (d,  $J = 8.9$  Hz, 1C), 128.9 (d,  $J = 3.0$  Hz, 1C), 122.6 (d,  $J = 14.8$  Hz, 1C), 121.4 (q,  $J = 282.8$  Hz, 2C), 121.3 (d,  $J = 23.6$  Hz, 1C), 75.8 (sept,  $J = 32.6$  Hz, 1C), 64.1 (d,  $J = 5.8$  Hz, 1C); Anal. Calcd. For  $C_{11}H_7F_7O_2$ : C, 43.44; H, 2.32%. Found: C, 43.41; H, 2.33%; MS (EI)  $m/z$  (%) 303.8( $M^+$ , 2), 153.0(100), 137.0(22), 108.0(52), 83.0(21), 68.9(33).

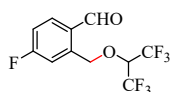

2-(((1,1,1,3,3,3-hexafluoropropan-2-yl)oxy)methyl)-4-fluorobenzaldehyde **2i**. yield:65% ( $M=304.16$ , 19.9mg).  $^1H$  NMR (600 MHz,  $CDCl_3$ )  $\delta$  10.02 (s, 1H), 7.87 (dd,  $J = 8.4, 5.6$  Hz, 1H), 7.48 (d,  $J = 9.7$  Hz, 1H), 7.22 (td,  $J = 8.2, 2.3$  Hz, 1H), 5.36 (s, 2H), 4.45-4.31 (m, 1H);  $^{13}C$  NMR (151 MHz,  $CDCl_3$ )  $\delta$  191.7, 166.3 (d,  $J = 257.9$  Hz, 1C), 141.6 (d,  $J = 9.2$  Hz, 1C), 137.5 (d,  $J = 10.1$  Hz, 1C), 129.1 (d,  $J = 2.8$  Hz, 1C), 121.4 (q,  $J = 283.8$  Hz, 2C), 115.2 (d,  $J = 10.9$  Hz, 1C), 115.0 (d,  $J = 13.3$  Hz, 1C), 76.5 (sept,  $J = 32.6$  Hz, 1C), 73.6; Anal. Calcd. For  $C_{11}H_7F_7O_2$ : C, 43.44; H, 2.32%. Found: C, 43.44; H, 2.31%; MS (EI)  $m/z$  (%) 304.0( $M^+$ , 4), 153.0(100), 137.1(16), 97.0(39), 68.0(23).

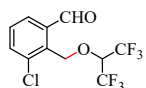



2-(((1,1,1,3,3,3-hexafluoropropan-2-yl)oxy)methyl)-3-chlorobenzaldehyde **2j**. yield:41% (M=320.62, 13.1mg). <sup>1</sup>H NMR (600 MHz, CDCl<sub>3</sub>) δ 10.22 (s, 1H), 7.83 (d, *J* = 7.6 Hz, 1H), 7.70 (d, *J* = 8.0 Hz, 1H), 7.55 (t, *J* = 7.8 Hz, 1H), 5.47 (s, 2H), 4.46-4.33 (m, 1H); <sup>13</sup>C NMR (151 MHz, CDCl<sub>3</sub>) δ 191.0, 137.3, 136.5, 135.0, 133.2, 131.2, 130.9, 121.4 (q, *J* = 282.9 Hz, 2C), 75.7 (sept, *J* = 32.6 Hz, 1C), 67.6; Anal. Calcd. For C<sub>11</sub>H<sub>7</sub>ClF<sub>6</sub>O<sub>2</sub>: C, 41.21; H, 2.20%. Found: C, 41.21; H, 2.19%; MS (EI) m/z (%) 320.0(M<sup>+</sup>, 7), 318.9(11), 169.0(100), 153.0(17), 124.0(42),89.0(81), 77.0(54).

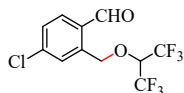

2-(((1,1,1,3,3,3-hexafluoropropan-2-yl)oxy)methyl)-4-chlorobenzaldehyde **2k**. yield:47% (M=320.62, 15.2mg). <sup>1</sup>H NMR (600 MHz, CDCl<sub>3</sub>) δ 10.05 (s, 1H), 7.79 (d, *J* = 8.1 Hz, 1H), 7.72 (s, 1H), 7.54 (d, *J* = 8.1 Hz, 1H), 5.33 (s, 2H), 4.41-4.33 (m, 1H); <sup>13</sup>C NMR (151 MHz, CDCl<sub>3</sub>) δ 191.9, 141.1, 139.5, 135.8, 130.9, 128.6, 128.0, 121.4 (q, *J* = 280.0 Hz, 2C), 76.4 (sept, *J* = 32.6 Hz, 1C), 73.4; Anal. Calcd. For C<sub>11</sub>H<sub>7</sub>ClF<sub>6</sub>O<sub>2</sub>: C, 41.21; H, 2.20%. Found: C, 41.19; H, 2.22%; MS (EI) m/z (%) 319.9(M<sup>+</sup>, 1), 169.0(100), 153.0(10), 113.0(39),89.0(57), 77.0(75).

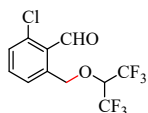

2-(((1,1,1,3,3,3-hexafluoropropan-2-yl)oxy)methyl)-6-chlorobenzaldehyde **2l**. yield:34% (M=320.62, 11.0mg). <sup>1</sup>H NMR (600 MHz, CDCl<sub>3</sub>) δ 10.63 (s, 1H), 7.69 (d, *J* = 7.8 Hz, 1H), 7.57 (t, *J* = 7.9 Hz, 1H), 7.47 (d, *J* = 8.0 Hz, 1H), 5.28 (s, 2H), 4.42-4.33 (m, 1H); <sup>13</sup>C NMR (151 MHz, CDCl<sub>3</sub>) δ 191.3 (d, *J* = 8.7 Hz, 1C), 139.1, 138.4, 133.7, 129.2, 127.9, 125.1, 120.4 (q, *J* = 282.0 Hz, 2C), 75.7 (sept, *J* = 32.6 Hz, 1C), 73.0; Anal. Calcd. For C<sub>11</sub>H<sub>7</sub>ClF<sub>6</sub>O<sub>2</sub>: C, 41.21; H, 2.20%. Found: C, 41.18; H, 2.21%; MS (EI) m/z (%) 320.0(M<sup>+</sup>, 2), 169.0(100), 153.0(11), 113.0(29), 77.0(84).

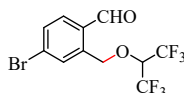

2-(((1,1,1,3,3,3-hexafluoropropan-2-yl)oxy)methyl)-4-bromobenzaldehyde **2m**. yield:36% (M=365.07, 13.1mg). <sup>1</sup>H NMR (600 MHz, CDCl<sub>3</sub>) δ 10.04 (s, 1H), 7.88 (s, 1H), 7.71 (s, 2H), 5.32 (s, 2H), 4.40 – 4.32 (m, 1H); <sup>13</sup>C NMR (151 MHz, CDCl<sub>3</sub>) δ 192.1, 139.3, 135.8, 131.7, 131.4, 131.0, 129.9, 121.4 (q, *J* = 286.1 Hz, 2C), 76.4 (sept, *J* = 32.6 Hz, 1C), 73.3; Anal. Calcd. For C<sub>11</sub>H<sub>7</sub>BrF<sub>6</sub>O<sub>2</sub>: C, 36.19; H, 1.93%. Found: C, 36.11; H, 1.91%; MS (EI) m/z (%) 365.9(8), 363.9(M<sup>+</sup>, 8), 212.8(100), 196.9(10), 156.9(7),104.9(7), 88.9(58),77.0(47),63.0(25).

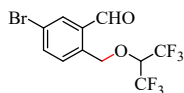

2-(((1,1,1,3,3,3-hexafluoropropan-2-yl)oxy)methyl)-5-bromobenzaldehyde **2n**. yield:67% (M=365.07, 24.6mg). <sup>1</sup>H NMR (600 MHz, CDCl<sub>3</sub>) δ 10.04 (s, 1H), 7.98 (d, *J* = 1.9 Hz, 1H), 7.79 (dd, *J* = 8.2, 1.9 Hz, 1H), 7.59 (d, *J* = 8.2 Hz, 1H), 5.28 (s, 2H), 4.41-4.25 (m, 1H); <sup>13</sup>C NMR (151 MHz, CDCl<sub>3</sub>) δ 191.6, 137.1, 136.9, 136.3, 134.3, 129.8, 122.6, 121.4 (q, *J* = 279.8 Hz, 2C), 76.3 (sept, *J* = 32.6 Hz, 1C), 73.4; Anal. Calcd. For C<sub>11</sub>H<sub>7</sub>BrF<sub>6</sub>O<sub>2</sub>: C, 36.19; H, 1.93%. Found: C, 36.21; H, 1.90%; MS (EI) m/z (%) 365.9(3), 363.9(M<sup>+</sup>, 3), 212.9(86), 196.9(9), 156.9(12), 104.9(12), 88.9(100), 77.0(86), 63.0(53).

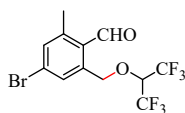

4-bromo-2-(((1,1,1,3,3,3-hexafluoropropan-2-yl)oxy)methyl)-6-methylbenzaldehyde **2o**. yield:41% (M=379.10, 15.3 mg).  $^1\text{H NMR}$  (600 MHz,  $\text{CDCl}_3$ )  $\delta$  10.50 (s, 1H), 7.71 (s, 1H), 7.44 (s, 1H), 5.23 (s, 2H), 4.37-4.29 (m, 1H), 2.67 (s, 3H);  $^{13}\text{C NMR}$  (151 MHz,  $\text{CDCl}_3$ )  $\delta$  191.9 (d,  $J = 3.5$  Hz, 1C), 143.9, 139.9, 134.4, 129.4, 129.1, 128.9, 121.4 (q,  $J = 285.6$  Hz, 2C), 76.3 (sept,  $J = 32.6$  Hz, 1C), 74.0, 19.4; Anal. Calcd. For  $\text{C}_{12}\text{H}_9\text{BrF}_6\text{O}_2$ : C, 38.02; H, 2.39%. Found: C, 38.01; H, 2.41%; MS (EI)  $m/z$  (%) 379.9(10), 377.9( $\text{M}^+$ , 12), 226.9(100), 211.0(13), 181.9(6), 131.0(8), 91.0(56), 77.0(32), 63.0(19).

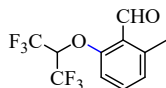

2-(((1,1,1,3,3,3-hexafluoropropan-2-yl)oxy)methyl)-6-methylbenzaldehyde **3a**. yield:63% (M=286.04, 18.0 mg).  $^1\text{H NMR}$  (600 MHz,  $\text{CDCl}_3$ )  $\delta$  10.63 (s, 1H), 7.46 (t,  $J = 8.0$  Hz, 1H), 7.06 (d,  $J = 7.6$  Hz, 1H), 6.93 (d,  $J = 8.4$  Hz, 1H), 5.06 – 4.94 (m, 1H), 2.61 (s, 3H);  $^{13}\text{C NMR}$  (151 MHz,  $\text{CDCl}_3$ )  $\delta$  190.7 (d,  $J = 10.8$  Hz, 1C), 160.5, 143.0, 134.4, 128.0, 125.2, 120.9 (q,  $J = 280.5$  Hz, 2C), 112.0, 76.0 (sept,  $J = 33.6$  Hz, 1C), 21.4;  $^{19}\text{F NMR}$  (565 MHz,  $\text{CDCl}_3$ )  $\delta$  -73.19, -73.20; Anal. Calcd. For  $\text{C}_{11}\text{H}_8\text{F}_6\text{O}_2$ : C, 46.17; H, 2.82%. Found: C, 46.16; H, 2.81%; MS (EI)  $m/z$  (%) 286.0( $\text{M}^+$ , 49), 270.9(14), 133.9(56), 106.0(28), 90.0(75), 77.0(100).

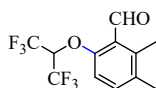

6-(((1,1,1,3,3,3-hexafluoropropan-2-yl)oxy)methyl)-2,3-dimethylbenzaldehyde **3b**. yield: 51% (M=300.06, 15.2 mg).  $^1\text{H NMR}$  (600 MHz,  $\text{CDCl}_3$ )  $\delta$  10.61 (s, 1H), 7.35 (d,  $J = 8.5$  Hz, 1H), 6.83 (d,  $J = 8.5$  Hz, 1H), 4.97 – 4.90 (m, 1H), 2.50 (s, 3H), 2.29 (s, 3H);  $^{13}\text{C NMR}$  (151 MHz,  $\text{CDCl}_3$ )  $\delta$  191.7 (d,  $J = 10.4$  Hz, 1C), 158.7, 140.7, 135.6, 134.4, 125.7, 120.9 (d,  $J = 285.5$  Hz, 2C), 111.4, 76.1 (sept,  $J = 33.3$  Hz, 1C), 19.9, 16.3; Anal. Calcd. For  $\text{C}_{12}\text{H}_{10}\text{F}_6\text{O}_2$ : C, 48.01; H, 3.36%. Found: C, 48.03; H, 3.36%; MS (EI)  $m/z$  (%) 300.0( $\text{M}^+$ , 66), 285.0(18), 265.0(7), 213.0(12), 195.3(3), 148.0(65), 121.1(46), 91.0(100), 77.0(89).

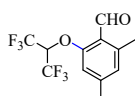

2-(((1,1,1,3,3,3-hexafluoropropan-2-yl)oxy)methyl)-4,6-dimethylbenzaldehyde **3c**. yield: 39% (M=300.06, 11.7 mg).  $^1\text{H NMR}$  (600 MHz,  $\text{CDCl}_3$ )  $\delta$  10.56 (s, 1H), 6.86 (s, 1H), 6.71 (s, 1H), 5.03 – 4.95 (m, 1H), 2.58 (s, 3H), 2.39 (s, 3H);  $^{13}\text{C NMR}$  (151 MHz,  $\text{CDCl}_3$ )  $\delta$  190.3 (d,  $J = 9.8$  Hz, 1C), 160.8, 146.0, 142.9, 128.9, 122.8, 120.9 (d,  $J = 282.2$  Hz, 2C), 112.7, 76.0 (sept,  $J = 33.5$  Hz, 1C), 22.0, 21.4; Anal. Calcd. For  $\text{C}_{12}\text{H}_{10}\text{F}_6\text{O}_2$ : C, 48.01; H, 3.36%. Found: C, 48.00; H, 3.34%; MS (EI)  $m/z$  (%) 300.0( $\text{M}^+$ , 91), 285.0(40), 265.1(3), 195.1(11), 148.1(73), 119.9(45), 90.9(83), 77.0(100);

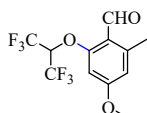

2-(((1,1,1,3,3,3-hexafluoropropan-2-yl)oxy)methyl)-4-methoxy-6-methylbenzaldehyde **3g**. yield:37% (M=316.05, 11.8 mg).  $^1\text{H NMR}$  (600 MHz,  $\text{CDCl}_3$ )  $\delta$  10.47 (s, 1H), 6.54 (s, 1H), 6.40 (s, 1H), 5.03 – 4.91 (m, 1H), 3.88 (s, 3H), 2.62 (s, 3H);  $^{13}\text{C NMR}$  (151 MHz,  $\text{CDCl}_3$ )  $\delta$  189.1, 164.1, 162.4, 145.6, 120.8 (q,  $J = 282.9$  Hz, 2C), 118.8, 112.3, 99.1, 75.9 (sept,  $J = 33.3$  Hz, 1C), 55.8, 22.3; Anal. Calcd. For

C<sub>12</sub>H<sub>10</sub>F<sub>6</sub>O<sub>3</sub>: C, 45.58; H, 3.19%. Found: C, 45.60; H, 3.17%; MS (EI) m/z (%) 315.0(M<sup>+</sup>, 98), 299.0(31), 269.0(5), 230.2(6), 164.0(89), 136.0(61), 121.0(32), 77.0(59).

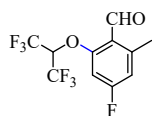

4-fluoro-2-((1,1,1,3,3,3-hexafluoropropan-2-yl)oxy)-6-methylbenzaldehyde **3i**. yield:46% (M=304.03, 14.0 mg). <sup>1</sup>H NMR (600 MHz, CDCl<sub>3</sub>) δ 10.45 (s, 1H), 6.72 (dd, *J* = 8.9, 1.8 Hz, 1H), 6.59 (dd, *J* = 9.2, 2.0 Hz, 1H), 4.98 – 4.76 (m, 1H), 2.56 (s, 3H); <sup>13</sup>C NMR (151 MHz, CDCl<sub>3</sub>) δ 188.0 (d, *J* = 4.9 Hz, 1C), 164.3 (d, *J* = 257.6 Hz, 1C), 160.8 (d, *J* = 11.1 Hz, 1C), 145.3 (d, *J* = 10.6 Hz, 1C), 120.8 (d, *J* = 3.1 Hz, 1C), 119.7 (q, *J* = 282.2 Hz, 2C), 114.0 (d, *J* = 20.9 Hz, 1C), 99.4 (d, *J* = 25.6 Hz, 1C), 75.0 (sept, *J* = 33.8 Hz, 1C), 20.9 (d, *J* = 1.3 Hz, 1C); Anal. Calcd. For C<sub>11</sub>H<sub>7</sub>F<sub>7</sub>O<sub>2</sub>: C, 43.44; H, 2.32%. Found: C, 43.46; H, 2.33%; MS (EI) m/z (%) 303.0(M<sup>+</sup>, 90), 288.9(21), 268.9(7), 199.0(15), 152.0(100), 124.0(58), 96.0(73), 68.9(83).

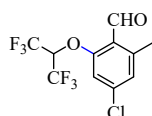

4-chloro-2-((1,1,1,3,3,3-hexafluoropropan-2-yl)oxy)-6-methylbenzaldehyde **3k**. yield:38% (M=320.00, 12.0 mg). <sup>1</sup>H NMR (600 MHz, CDCl<sub>3</sub>) δ 10.53 (s, 1H), 7.07 (s, 1H), 6.94 (s, 1H), 5.05 – 4.90 (m, 1H), 2.60 (s, 3H); <sup>13</sup>C NMR (151 MHz, CDCl<sub>3</sub>) δ 188.4 (d, *J* = 9.5 Hz, 1C), 159.7, 143.6, 139.0, 127.2, 122.6, 119.7 (q, *J* = 282.6 Hz, 2C), 111.9, 75.1 (sept, *J* = 33.8 Hz, 1C), 20.4; Anal. Calcd. For C<sub>11</sub>H<sub>7</sub>ClF<sub>6</sub>O<sub>2</sub>: C, 41.21; H, 2.20%. Found: C, 41.20; H, 2.21%; MS (EI) m/z (%) 319.9(M<sup>+</sup>, 50), 318.9(55), 304.8(13), 285.0(32), 168.0(60), 113.0(35), 89.0(50), 77.0(100).

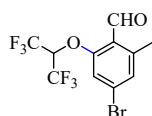

4-bromo-2-((1,1,1,3,3,3-hexafluoropropan-2-yl)oxy)-6-methylbenzaldehyde **3m**. yield:33% (M=363.95, 12.0 mg). <sup>1</sup>H NMR (600 MHz, CDCl<sub>3</sub>) δ 10.54 (s, 1H), 7.25 (s, 1H), 7.09 (s, 1H), 5.02 – 4.90 (m, 1H), 2.59 (s, 3H); <sup>13</sup>C NMR (151 MHz, CDCl<sub>3</sub>) δ 189.6 (d, *J* = 7.2 Hz, 1C), 160.5, 144.6, 131.2, 128.4, 124.0, 120.7 (q, *J* = 282.9 Hz, 2C), 115.9, 76.1 (sept, *J* = 33.8 Hz, 1C), 21.3; Anal. Calcd. For C<sub>11</sub>H<sub>7</sub>BrF<sub>6</sub>O<sub>2</sub>: C, 36.19; H, 1.93%. Found: C, 36.22; H, 1.92%; MS (EI) m/z (%) 363.9(M<sup>+</sup>, 40), 285.0(57), 265.0(21), 211.9(48), 134.0(14), 105.0(26), 77.0(100).

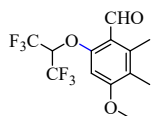

6-((1,1,1,3,3,3-hexafluoropropan-2-yl)oxy)-4-methoxy-2,3-dimethylbenzaldehyde **3p**. yield: 47% (M=330.07, 15.4 mg). <sup>1</sup>H NMR (600 MHz, CDCl<sub>3</sub>) δ 10.50 (s, 1H), 6.36 (s, 1H), 4.98 – 4.87 (m, 1H), 3.90 (s, 3H), 2.55 (s, 3H), 2.13 (s, 3H); <sup>13</sup>C NMR (151 MHz, CDCl<sub>3</sub>) δ 190.1 (d, *J* = 9.5 Hz, 1C), 162.2, 160.8, 142.2, 123.2, 120.9 (d, *J* = 280.2 Hz, 2C), 119.1, 95.0, 76.5 (sept, *J* = 33.3 Hz, 1C), 55.8, 16.5, 11.2; Anal. Calcd. For C<sub>13</sub>H<sub>12</sub>F<sub>6</sub>O<sub>3</sub>: C, 47.28; H, 3.66%. Found: C, 47.31; H, 3.65%; MS (EI) m/z (%) 330.1(M<sup>+</sup>, 97), 313.0(40), 244.2(11), 179.1 (100), 150.1(40), 135.0(32), 107.0(32), 91.0(92) 77.0(83).

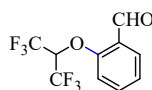

2-((1,1,1,3,3,3-hexafluoropropan-2-yl)oxy)benzaldehyde **3r**.<sup>1</sup> yield:45% (M=272.03, 12.2 mg). <sup>1</sup>H NMR

(600 MHz, CDCl<sub>3</sub>) δ 10.48 (s, 1H), 7.94 (dd, *J* = 7.7, 1.7 Hz, 1H), 7.72 – 7.59 (m, 1H), 7.29 (t, *J* = 7.5 Hz, 1H), 7.11 (d, *J* = 8.4 Hz, 1H), 5.06 – 4.94 (m, 1H); <sup>13</sup>C NMR (151 MHz, CDCl<sub>3</sub>) δ 188.0 (d, *J* = 9.2 Hz, 1C), 159.15, 136.08, 129.10, 126.76, 124.81, 120.9 (q, *J* = 284.9 Hz, 2C), 114.82, 76.0 (sept, *J* = 33.6 Hz, 1C).

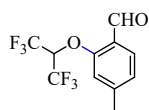

2-((1,1,1,3,3,3-hexafluoropropan-2-yl)oxy)-4-methylbenzaldehyde **3s**. yield:52% (M=286.04, 14.8 mg). <sup>1</sup>H NMR (600 MHz, CDCl<sub>3</sub>) δ 10.40 (s, 1H), 7.82 (d, *J* = 7.9 Hz, 1H), 7.08 (d, *J* = 7.9 Hz, 1H), 6.88 (s, 1H), 5.05 – 4.92 (m, 1H), 2.45 (s, 3H); <sup>13</sup>C NMR (151 MHz, CDCl<sub>3</sub>) δ 187.8, 159.2, 147.9, 129.0, 125.7, 124.5, 120.9 (q, *J* = 282.3 Hz, 2C), 115.3, 75.9 (sept, *J* = 33.6 Hz, 1C), 22.2; Anal. Calcd. For C<sub>11</sub>H<sub>8</sub>F<sub>6</sub>O<sub>2</sub>: C, 46.17; H, 2.82%. Found: C, 46.16; H, 2.80%; MS (EI) *m/z* (%) 286.1(M<sup>+</sup>, 73), 271.0(39), 251.0(11), 217.0(10), 181.1(16), 134.0(97), 91.0(48), 77.0(100).

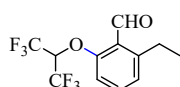

2-ethyl-6-((1,1,1,3,3,3-hexafluoropropan-2-yl)oxy)benzaldehyde **3t**. yield:66% (M=300.06, 19.8 mg). <sup>1</sup>H NMR (600 MHz, CDCl<sub>3</sub>) δ 10.61 (s, 1H), 7.50 (t, *J* = 8.1 Hz, 1H), 7.09 (d, *J* = 7.7 Hz, 1H), 6.93 (d, *J* = 8.4 Hz, 1H), 5.05 – 4.93 (m, 1H), 3.01 (q, *J* = 7.4 Hz, 2H), 1.22 (t, *J* = 7.5 Hz, 3H); <sup>13</sup>C NMR (151 MHz, CDCl<sub>3</sub>) δ 190.6 (d, *J* = 9.8 Hz, 1C), 160.5, 149.2, 134.6, 126.4, 124.8, 120.9 (d, *J* = 285.6 Hz, 2C), 111.9, 76.0 (sept, *J* = 33.6 Hz, 1C), 26.9, 15.4; Anal. Calcd. For C<sub>12</sub>H<sub>10</sub>F<sub>6</sub>O<sub>2</sub>: C, 48.01; H, 3.36%. Found: C, 47.98; H, 3.37%; MS (EI) *m/z* (%) 300.0(M<sup>+</sup>, 63), 271.0(17), 195.0(12), 148.1(41), 121.1(60), 103.0(100), 91.0(68), 77.0(98).

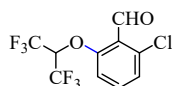

2-chloro-6-((1,1,1,3,3,3-hexafluoropropan-2-yl)oxy)benzaldehyde **3u**.<sup>2</sup> yield:47% (M=305.99, 14.4 mg). <sup>1</sup>H NMR (600 MHz, CDCl<sub>3</sub>) δ 10.48 (s, 1H), 7.50 (t, *J* = 8.3 Hz, 1H), 7.30 (d, *J* = 8.1 Hz, 1H), 7.03 (d, *J* = 8.5 Hz, 1H), 5.06 – 4.93 (m, 1H); <sup>13</sup>C NMR (151 MHz, CDCl<sub>3</sub>) δ 187.4 (d, *J* = 9.8 Hz, 1C), 158.72, 136.71, 134.46, 127.36, 124.84, 120.7 (d, *J* = 282.9 Hz, 2C), 114.12, 76.2 (sept, *J* = 33.5 Hz, 1C).

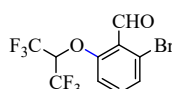

2-bromo-6-((1,1,1,3,3,3-hexafluoropropan-2-yl)oxy)benzaldehyde **3v**.<sup>3</sup> yield:51% (M=349.94, 17.8 mg). <sup>1</sup>H NMR (600 MHz, CDCl<sub>3</sub>) δ 10.38 (s, 1H), 7.50 (d, *J* = 8.0 Hz, 1H), 7.41 (t, *J* = 8.2 Hz, 1H), 7.08 (d, *J* = 8.4 Hz, 1H), 5.07 – 4.94 (m, 1H); <sup>13</sup>C NMR (151 MHz, CDCl<sub>3</sub>) δ 188.5, 158.6, 134.6, 130.7, 126.1, 124.7, 120.7 (d, *J* = 282.5 Hz, 2C), 114.9, 76.2 (sept, *J* = 33.8 Hz, 1C).

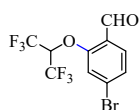

4-bromo-2-((1,1,1,3,3,3-hexafluoropropan-2-yl)oxy)benzaldehyde **3w**.<sup>4</sup> yield:34% (M=349.94, 11.9 mg). <sup>1</sup>H NMR (600 MHz, CDCl<sub>3</sub>) δ 10.39 (s, 1H), 7.81 (d, *J* = 8.3 Hz, 1H), 7.44 (d, *J* = 8.4 Hz, 1H), 7.27 (d, *J* = 1.3 Hz, 1H), 5.05 – 4.94 (m, 1H); <sup>13</sup>C NMR (151 MHz, CDCl<sub>3</sub>) δ 186.9, 159.0, 130.3, 130.3,

128.5, 125.6, 120.7 (d,  $J = 285.0$  Hz, 2C), 118.6, 76.1 (sept,  $J = 33.8$  Hz, 1C).

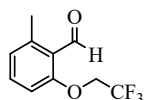

2-methyl-6-(2,2,2-trifluoroethoxy)benzaldehyde **4**. yield:52% (M=218.18, 11.3 mg).  $^1\text{H}$  NMR (600 MHz,  $\text{CDCl}_3$ )  $\delta$  10.66 (s, 1H), 7.41 (t,  $J = 8.0$  Hz, 1H), 6.94 (d,  $J = 7.6$  Hz, 1H), 6.80 (d,  $J = 8.4$  Hz, 1H), 4.45 (q,  $J = 7.9$  Hz, 2H), 2.60 (s, 3H);  $^{13}\text{C}$  NMR (151 MHz,  $\text{CDCl}_3$ )  $\delta$  191.4, 160.7, 142.7, 134.3, 126.2, 124.1, 123.1 (d,  $J = 276.5$  Hz, 2C), 110.2, 66.4 (q,  $J = 35.9$  Hz, 1C), 21.4; Anal. Calcd. For  $\text{C}_{10}\text{H}_9\text{F}_3\text{O}_2$ : C, 55.05; H, 4.16%. Found: C, 55.06; H, 4.18%; MS (EI)  $m/z$  (%) 218.0( $\text{M}^+$ , 100), 201.1(27), 134.0(28), 118.1(37), 90.0(70), 77.0(76).

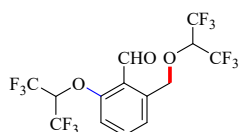

2-((1,1,1,3,3,3-hexafluoropropan-2-yl)oxy)-6-(((1,1,1,3,3,3-hexafluoropropan-2-yl)oxy)methyl)benzaldehyde **5**. Total yield: 27% (M=452.03, 12.4 mg).  $^1\text{H}$  NMR (600 MHz,  $\text{CDCl}_3$ )  $\delta$  10.58 (s, 1H), 7.69 (t,  $J = 8.1$  Hz, 1H), 7.60 (d,  $J = 7.9$  Hz, 1H), 7.10 (d,  $J = 8.4$  Hz, 1H), 5.31 (s, 2H), 5.07-4.97 (m, 1H), 4.42-4.31 (m, 1H);  $^{13}\text{C}$  NMR (151 MHz,  $\text{CDCl}_3$ )  $\delta$  190.2 (d,  $J = 8.3$  Hz, 1C), 160.3, 140.6, 135.8, 123.1, 122.9, 122.1 (d,  $J = 104.3$  Hz, 2C), 120.2(d,  $J = 104.1$  Hz, 2C), 113.9, 76.6 (sept,  $J = 32.4$  Hz, 1C), 76.1 (sept,  $J = 33.6$  Hz, 1C), 74.2.

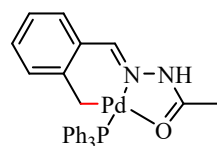

Intermediate **6**. yield:48% (M=543.08, 26.1 mg).  $^1\text{H}$  NMR (600 MHz,  $\text{CDCl}_3$ )  $\delta$  8.22 (d,  $J = 9.4$  Hz, 1H), 7.65-7.60 (m, 6H), 7.50-7.44 (m, 4H), 7.44-7.39 (m, 6H), 7.32 (d,  $J = 7.4$  Hz, 1H), 7.14 (t,  $J = 7.3$  Hz, 1H), 7.10 (t,  $J = 7.3$  Hz, 1H), 6.89 (d,  $J = 7.4$  Hz, 1H), 2.94 (d,  $J = 6.2$  Hz, 2H), 2.15 (s, 3H);  $^{13}\text{C}$  NMR (151 MHz,  $\text{CDCl}_3$ )  $\delta$  178.1 (d,  $J = 4.7$  Hz, 1C), 148.5, 143.7, 134.5, 134.5, 134.4, 132.9, 132.5, 132.2, 132.1, 132.1, 132.0, 131.9, 131.1, 130.8, 130.7, 130.7, 130.2, 128.9, 128.7, 128.6, 128.5, 128.5, 124.8, 26.5 (d,  $J = 5.3$  Hz, 1C), 19.3; HRMS (ESI):  $m/z$  [ $\text{M}+2\text{H}$ ] $^+$  calcd for  $\text{C}_{28}\text{H}_{26}\text{N}_2\text{OPPd}$  545.0818, found 545.0826.

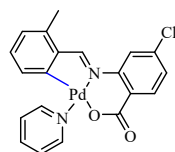

Intermediate **7**. yield:65% (M=455.99, 29.7 mg).  $^1\text{H}$  NMR (600 MHz,  $\text{CDCl}_3$ )  $\delta$  8.84 (d,  $J = 5.0$  Hz, 2H), 8.71 (s, 1H), 8.26 (d,  $J = 8.5$  Hz, 1H), 7.91 (t,  $J = 7.7$  Hz, 1H), 7.47 (dd,  $J = 7.4, 6.6$  Hz, 2H), 7.40 (d,  $J = 1.7$  Hz, 1H), 7.30 (dd,  $J = 8.5, 1.8$  Hz, 1H), 6.95 (t,  $J = 7.6$  Hz, 1H), 6.84 (d,  $J = 7.5$  Hz, 1H), 6.28 (d,  $J = 7.6$  Hz, 1H), 2.58 (s, 3H);  $^{13}\text{C}$  NMR (151 MHz,  $\text{CDCl}_3$ )  $\delta$  169.9, 169.3, 160.8, 152.6, 145.5, 144.0, 141.0, 138.6, 136.4, 136.3, 133.0, 131.8, 130.9, 128.3, 127.0, 125.6, 117.6, 20.2.

Reference:

[1] CAS Registry Number: 1988549-39-8.

[2] CAS Registry Number: 1990191-30-4.

[3] CAS Registry Number: 1779119-70-8.

[4] CAS Registry Number: 1707604-69-0.

## 6. <sup>1</sup>H NMR, <sup>13</sup>C NMR and MS Spectra of the Products

<sup>1</sup>H NMR of 2-(((1,1,1,3,3,3-hexafluoropropan-2-yl)oxy)methyl)benzaldehyde **2a**

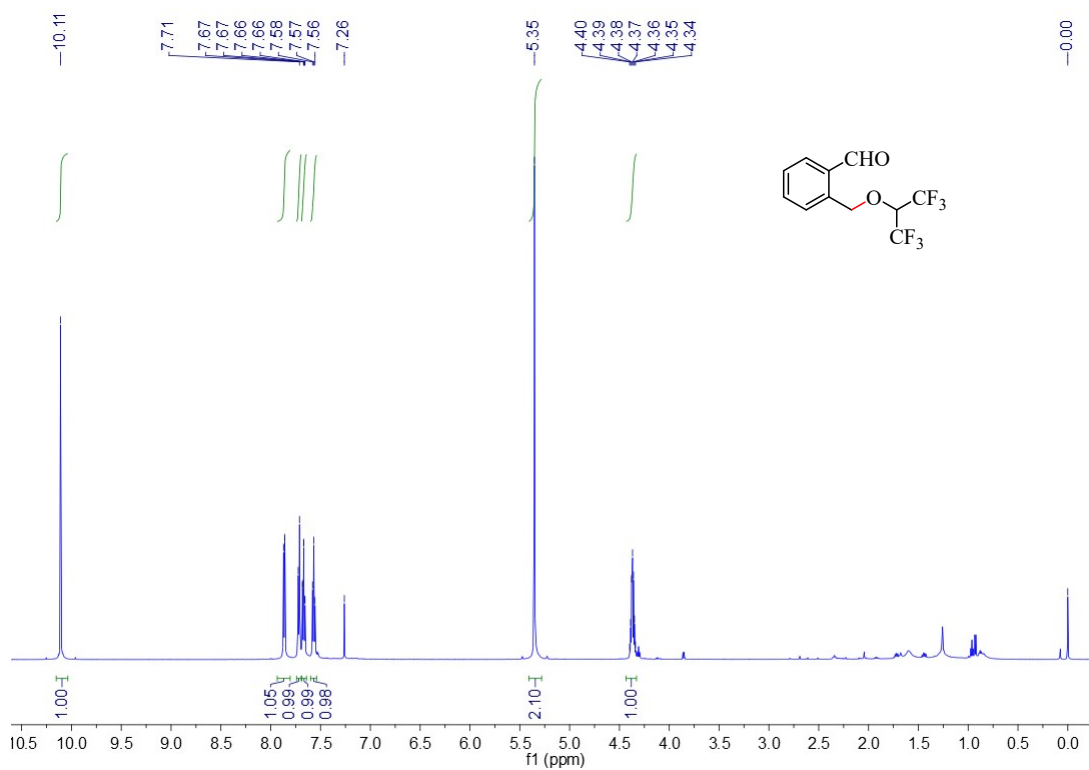

<sup>13</sup>C NMR of 2-(((1,1,1,3,3,3-hexafluoropropan-2-yl)oxy)methyl)benzaldehyde **2a**

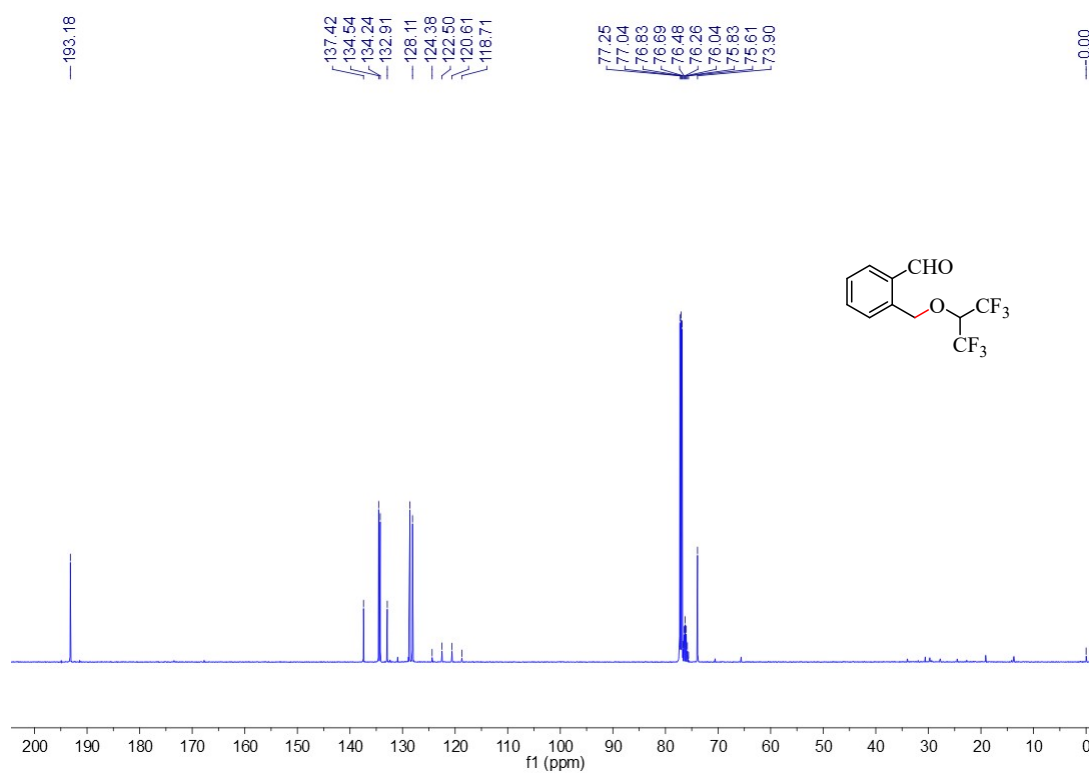

$^{19}\text{F}$  NMR of 2-(((1,1,1,3,3,3-hexafluoropropan-2-yl)oxy)methyl)benzaldehyde **2a**

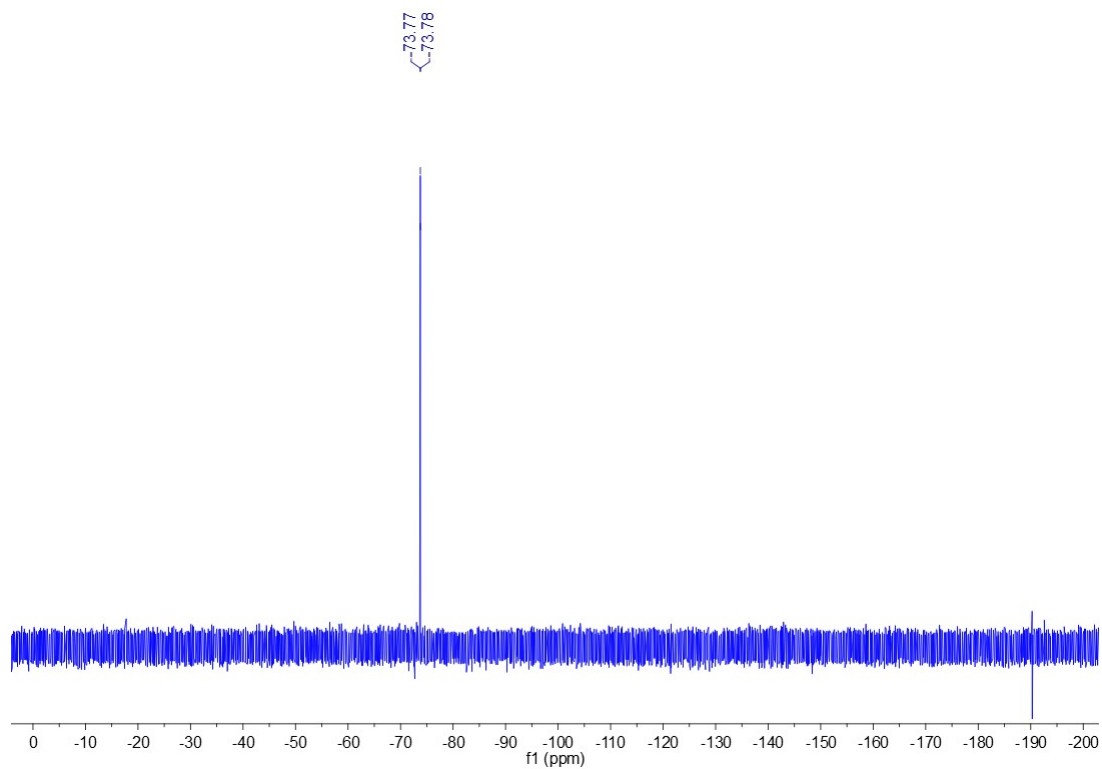

MS(EI) of 2-(((1,1,1,3,3,3-hexafluoropropan-2-yl)oxy)methyl)benzaldehyde **2a**

**2a** #1591 RT: 5.33 AV: 1 AV: 5 SB: 12 1584-1589 1593-1598 NL: 3.77E7  
F: + c Full ms [50.00-650.00]

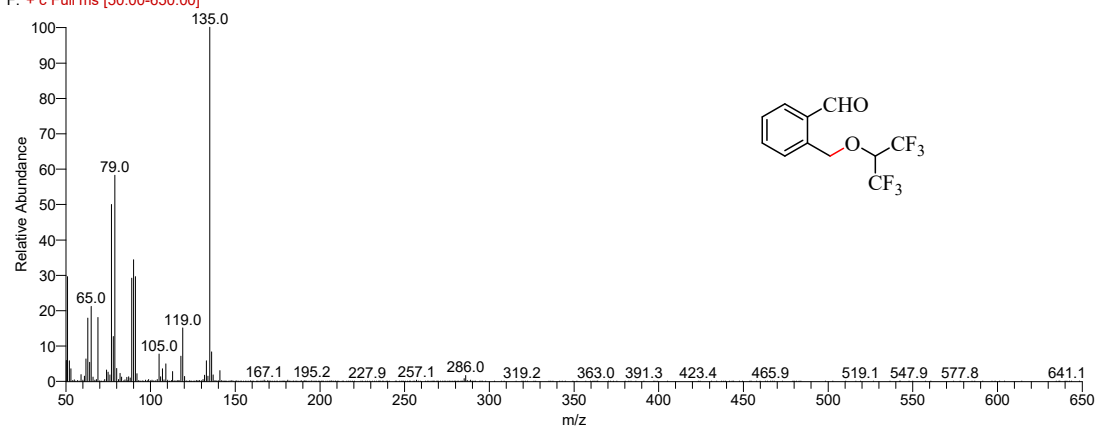

<sup>1</sup>H NMR of 2-(((1,1,1,3,3,3-hexafluoropropan-2-yl)oxy)methyl)-3-methylbenzaldehyde **2b**

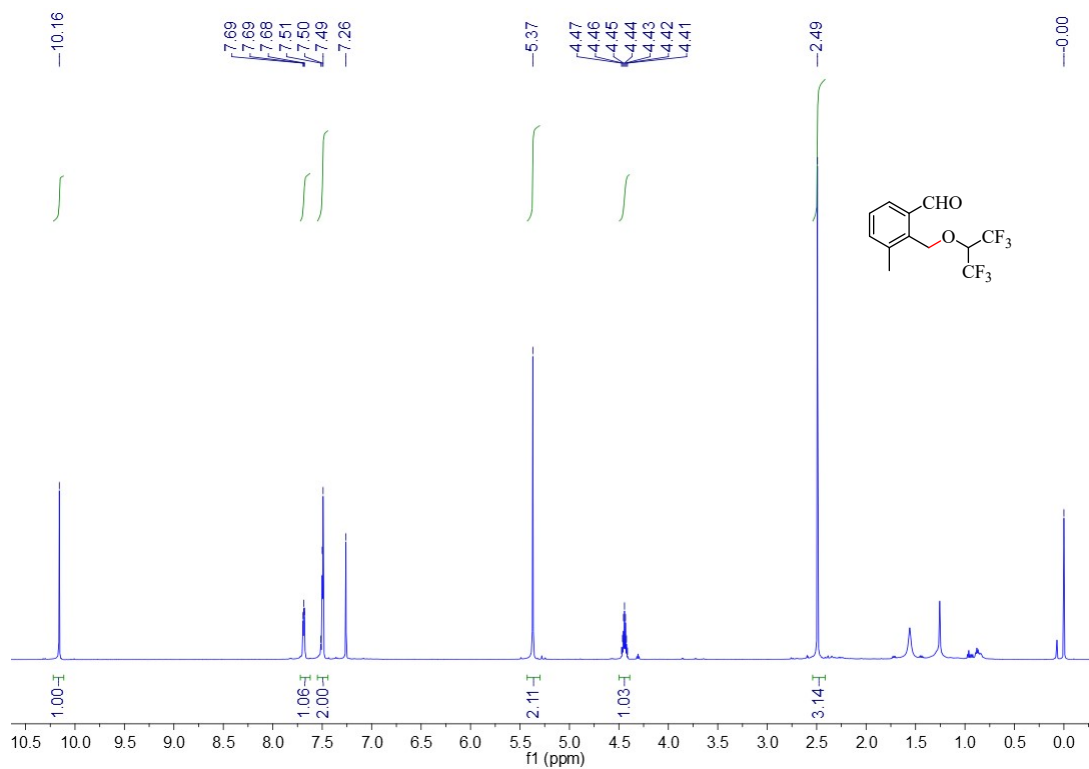

<sup>13</sup>C NMR of 2-(((1,1,1,3,3,3-hexafluoropropan-2-yl)oxy)methyl)-3-methylbenzaldehyde **2b**

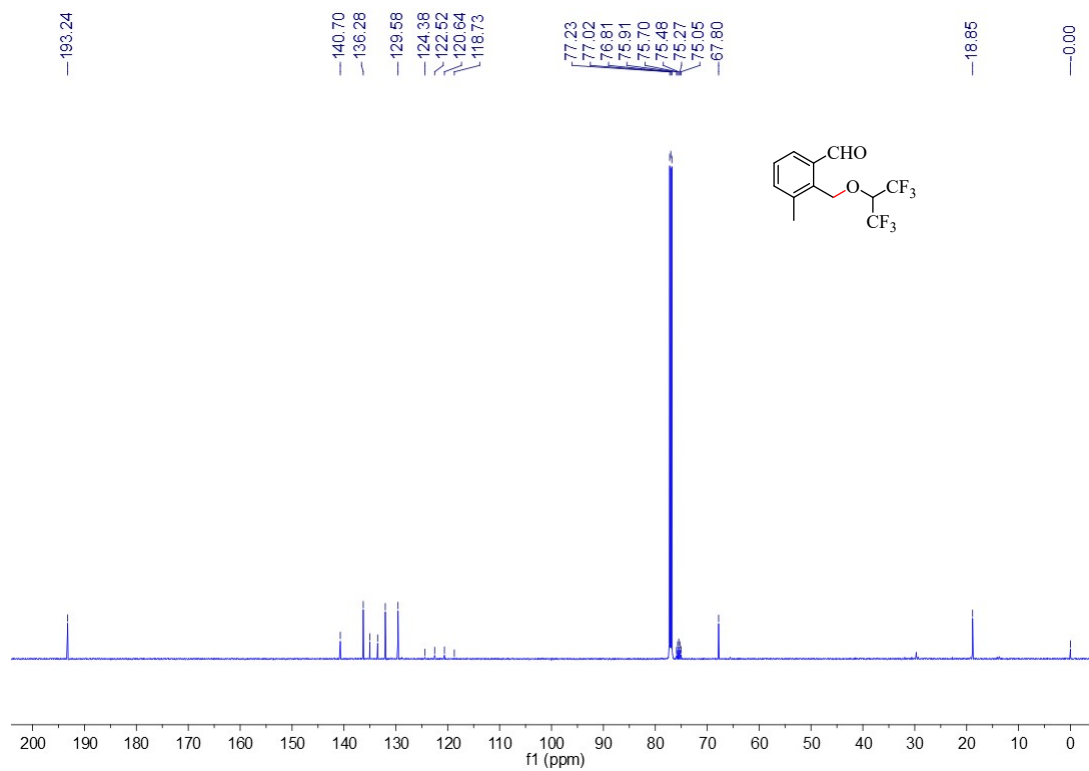



MS(EI) of 2-(((1,1,1,3,3,3-hexafluoropropan-2-yl)oxy)methyl)-3-methylbenzaldehyde **2b**

2b #1303 RT: 4.38 AV: 1 SB: 12 1296-1301 1305-1310 NL: 8.38E5  
F: + c Full ms [50.00-650.00]

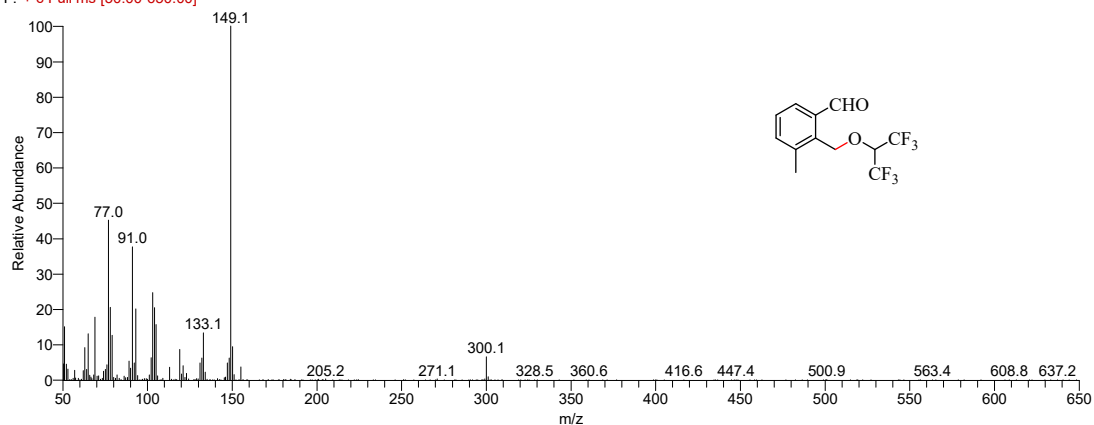

<sup>1</sup>H NMR of 2-(((1,1,1,3,3,3-hexafluoropropan-2-yl)oxy)methyl)-4-methylbenzaldehyde **2c**

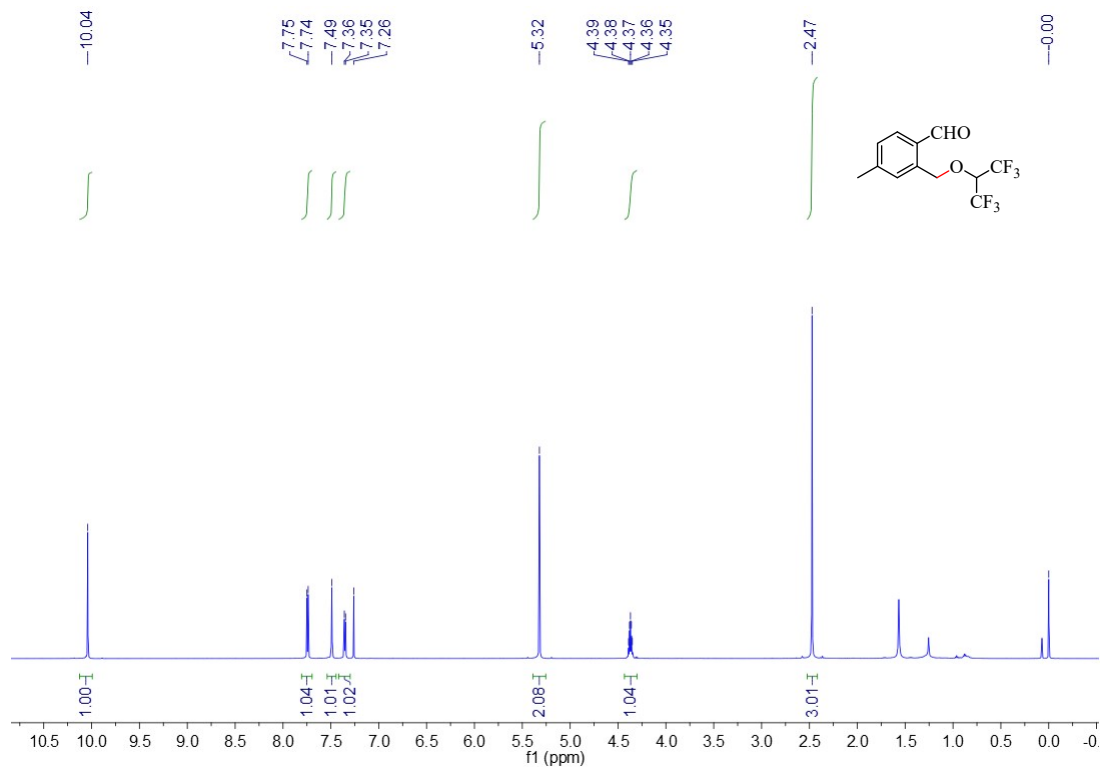

<sup>13</sup>C NMR of 2-(((1,1,1,3,3,3-hexafluoropropan-2-yl)oxy)methyl)-4-methylbenzaldehyde **2c**

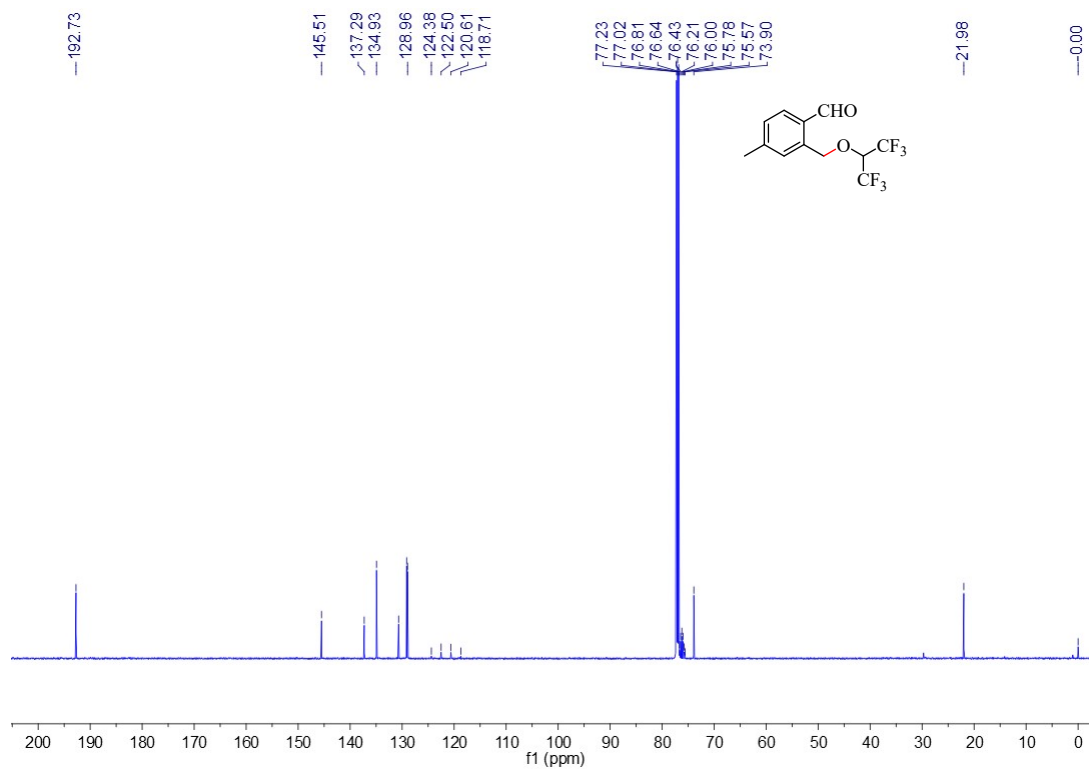

MS(EI) of 2-(((1,1,1,3,3,3-hexafluoropropan-2-yl)oxy)methyl)-4-methylbenzaldehyde **2c**

2c #1305 RT: 4.38 AV: 1 AV: 5 SB: 12 1298-1303 1307-1312 NL: 8.04E5  
F: + c Full ms [50.00-650.00]

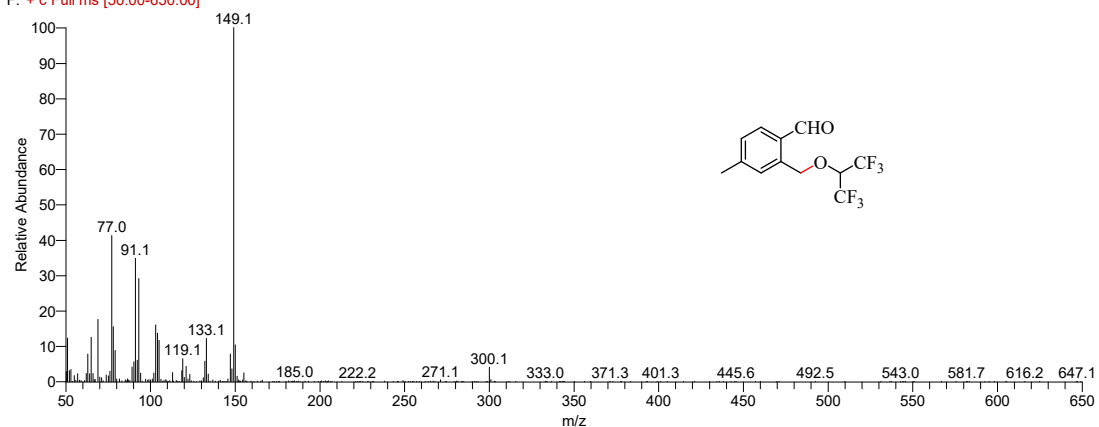

<sup>1</sup>H NMR of 2-((1,1,1,3,3,3-hexafluoropropan-2-yloxy)methyl)-6-methylbenzaldehyde **2d**

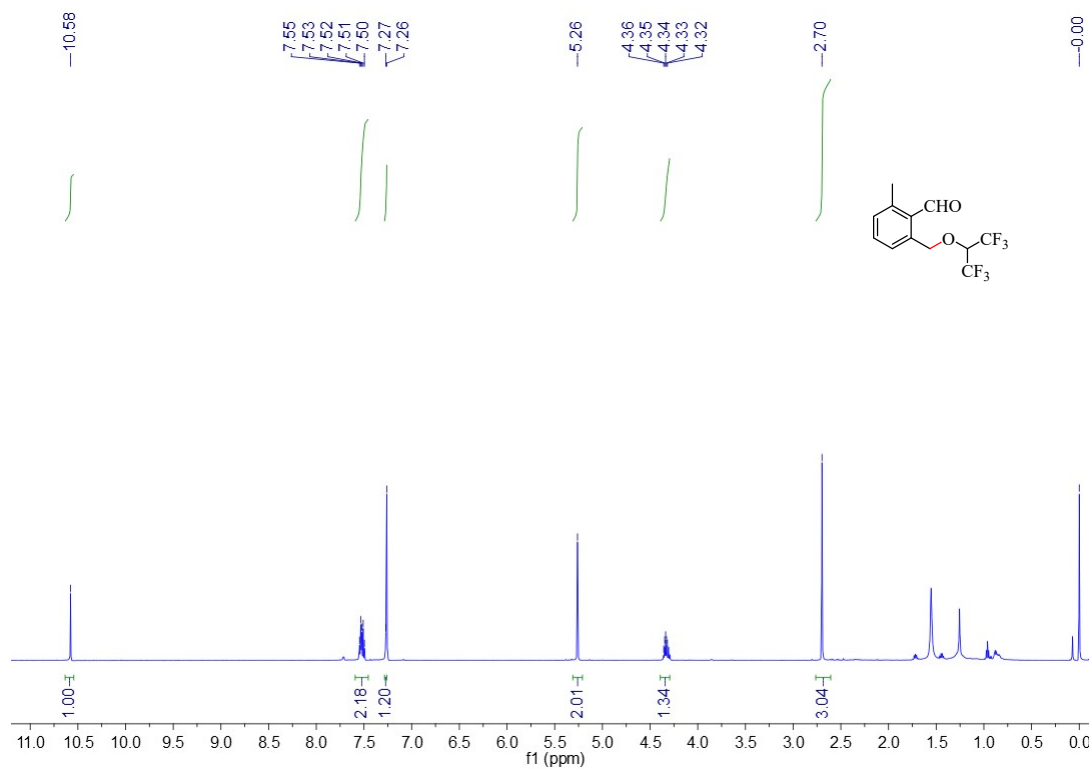

<sup>13</sup>C NMR of 2-((1,1,1,3,3,3-hexafluoropropan-2-yloxy)methyl)-6-methylbenzaldehyde **2d**

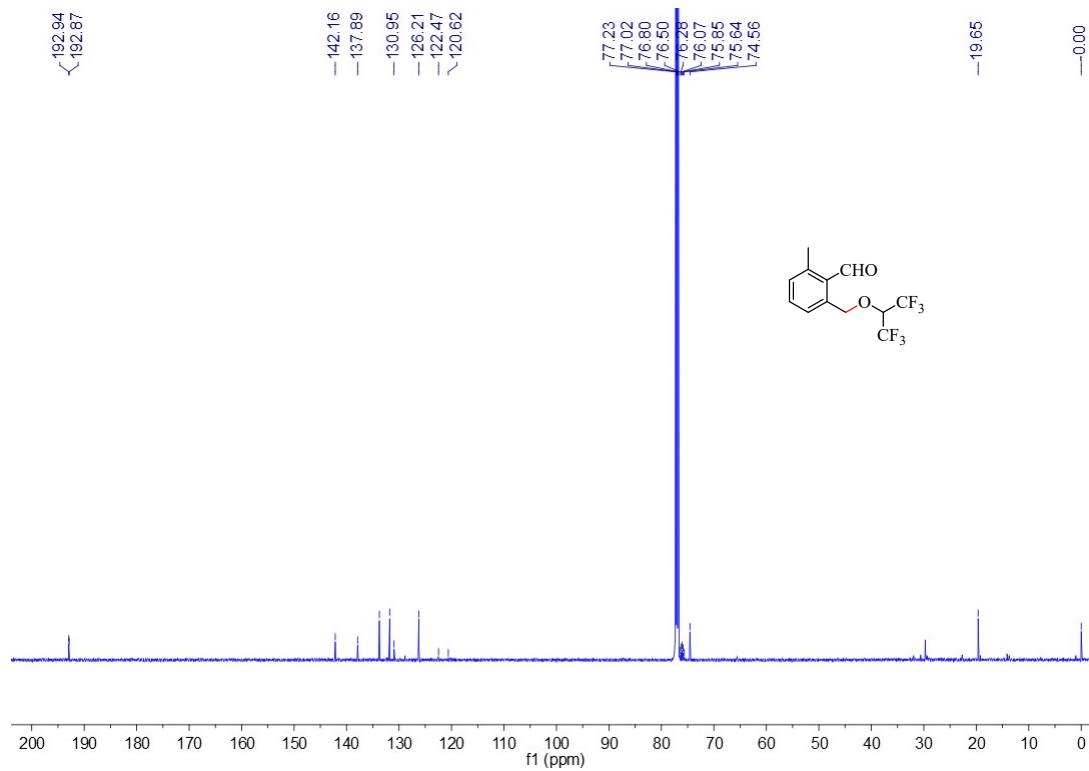

MS(EI) of 2-((1,1,1,3,3,3-hexafluoropropan-2-yloxy)methyl)-6-methylbenzaldehyde **2d**

2d #1332 RT: 4.47 AV: 1 AV: 5 SB: 12 1325-1330 1334-1339 NL: 3.18E6  
F: + c Full ms [50.00-650.00]

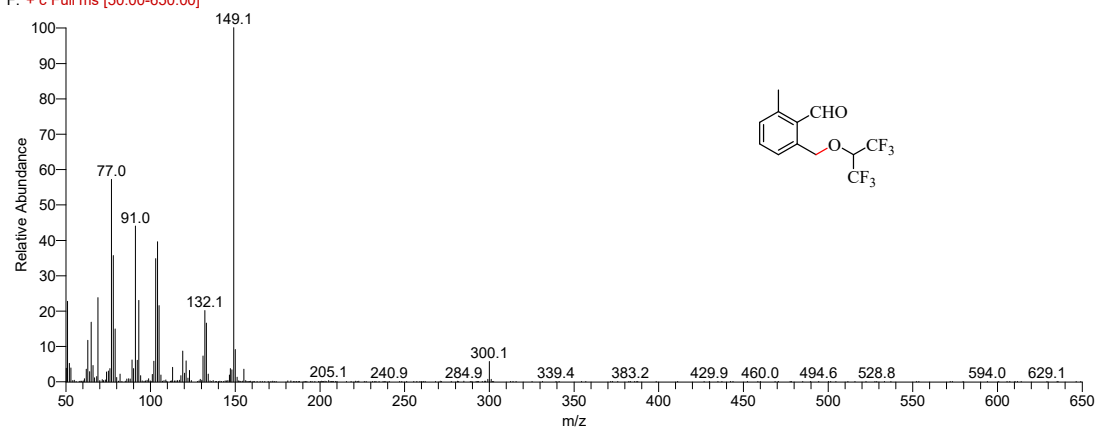

<sup>1</sup>H NMR of 2,6-bis(((1,1,1,3,3,3-hexafluoropropan-2-yl)oxy)methyl)benzaldehyde **2d'**

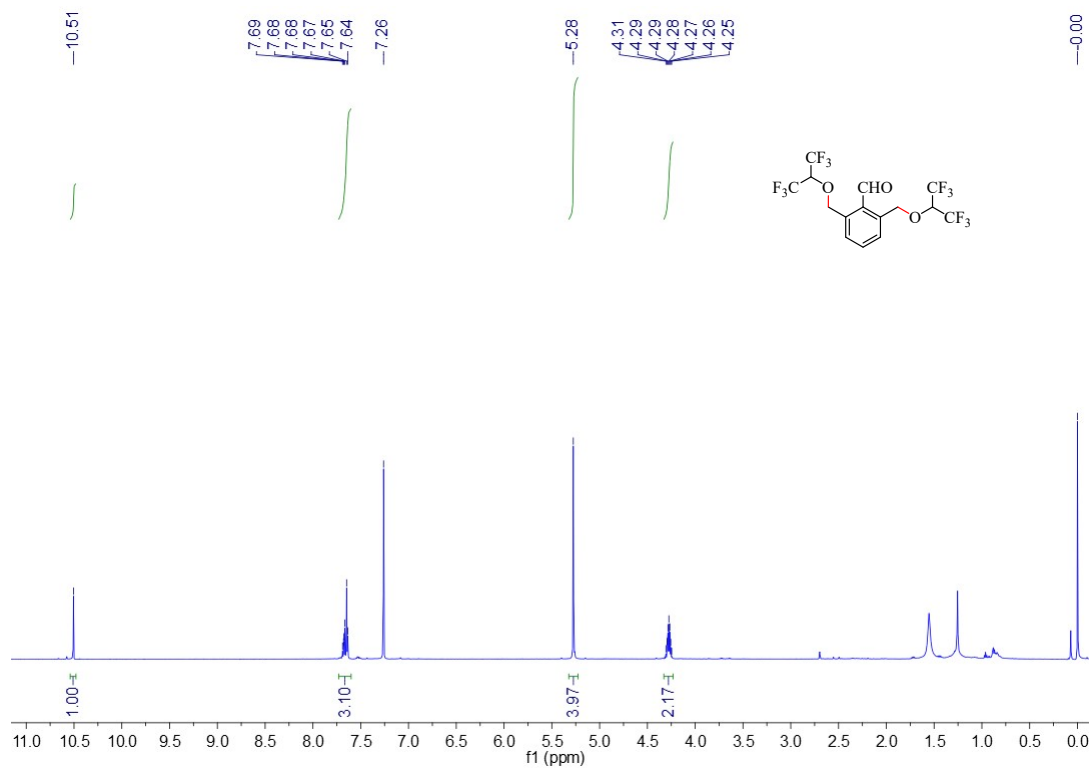

$^{13}\text{C}$  NMR of 2,6-bis(((1,1,1,3,3,3-hexafluoropropan-2-yl)oxy)methyl)benzaldehyde **2d'**

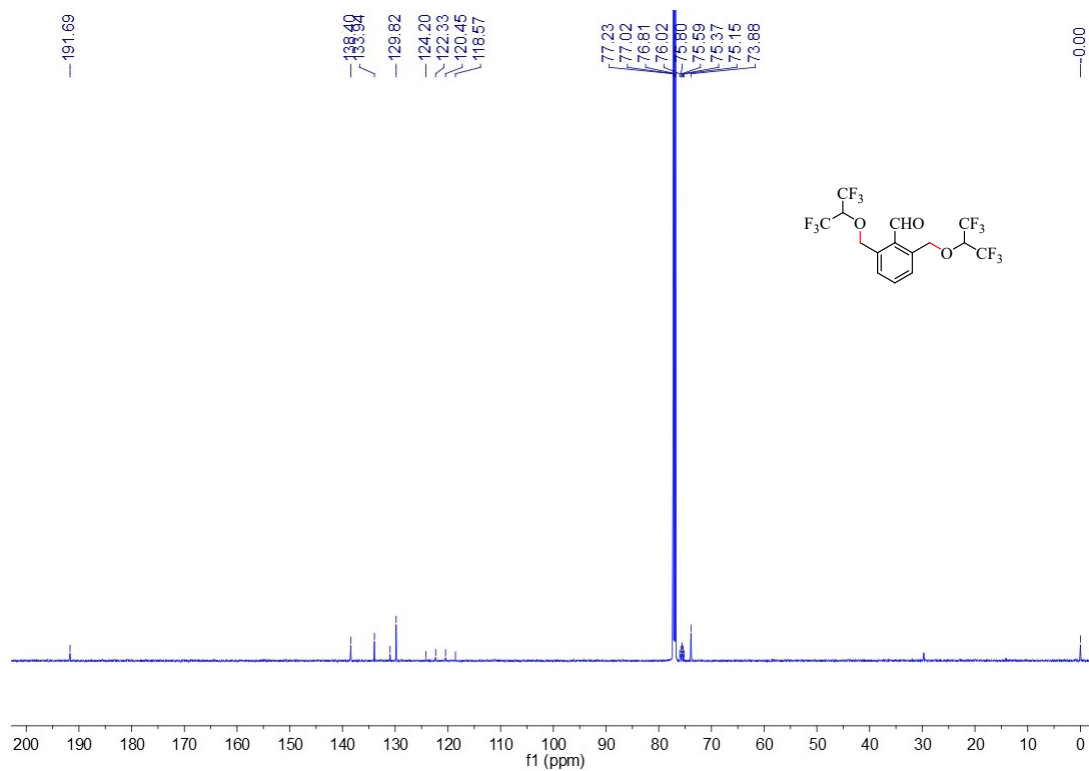

MS(EI) of 2,6-bis(((1,1,1,3,3,3-hexafluoropropan-2-yl)oxy)methyl)benzaldehyde **2d'**

2d2 #1391 RT: 4.67 AV: 1 AV: 5 SB: 12 1384-1389 1393-1398 NL: 5.50E6  
F: + c Full ms [50.00-650.00]

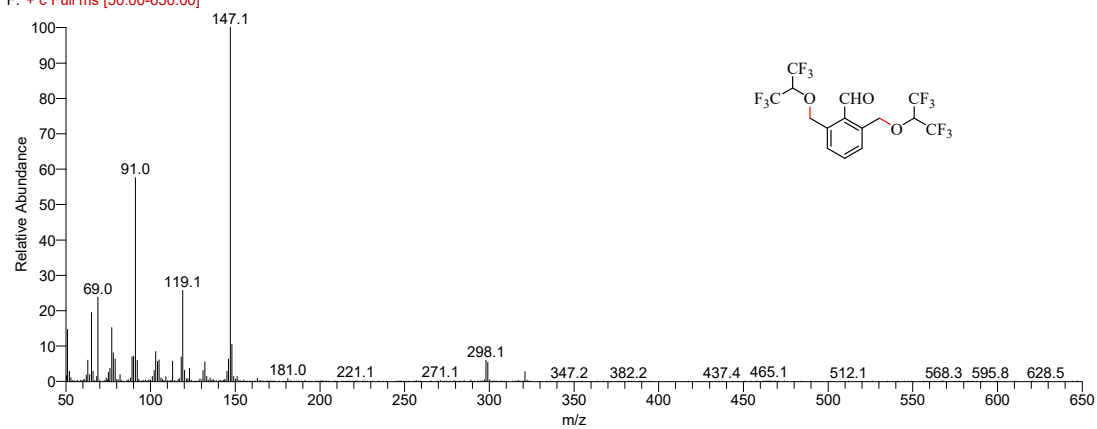

<sup>1</sup>H NMR of 2-(((1,1,1,3,3,3-hexafluoropropan-2-yl)oxy)methyl)-4,5-dimethylbenzaldehyde **2e**

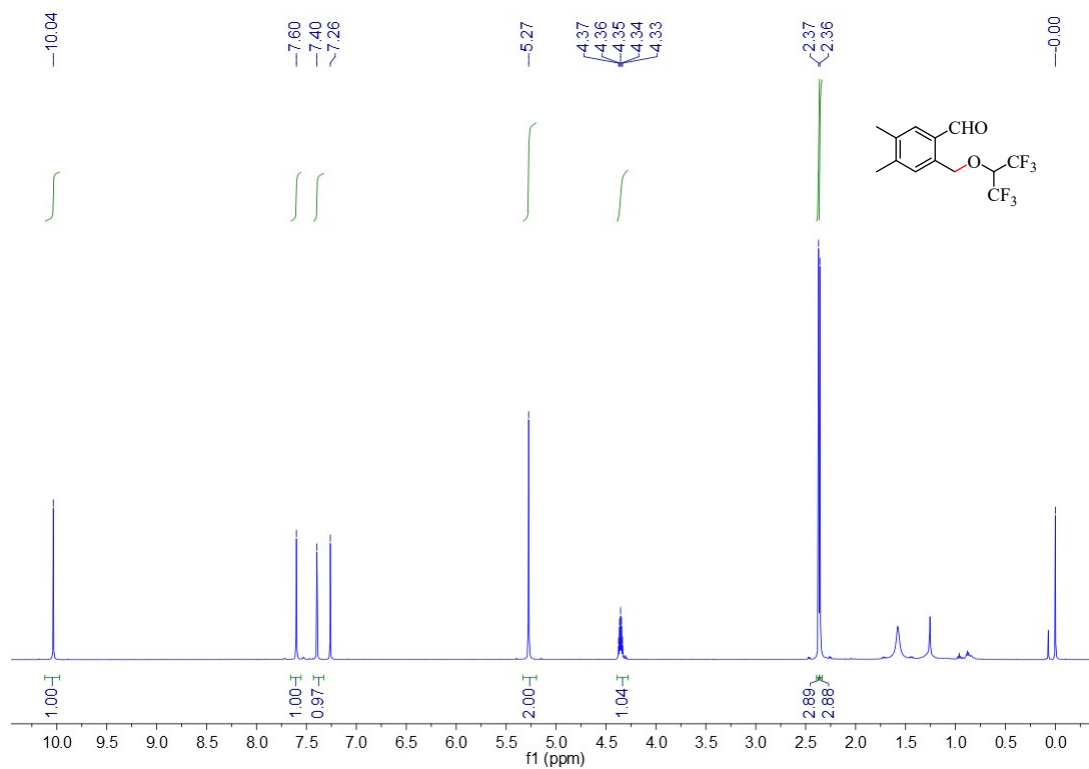

<sup>13</sup>C NMR of 2-(((1,1,1,3,3,3-hexafluoropropan-2-yl)oxy)methyl)-4,5-dimethylbenzaldehyde **2e**

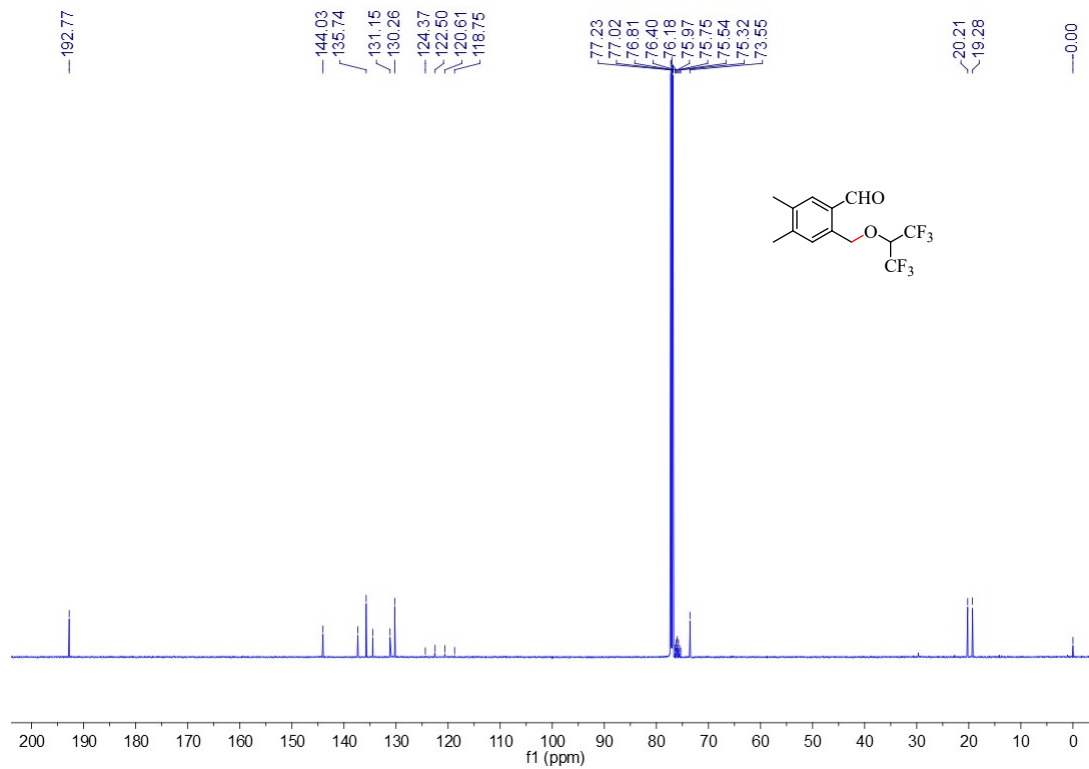

MS(EI) of 2-(((1,1,1,3,3,3-hexafluoropropan-2-yl)oxy)methyl)-4,5-dimethylbenzaldehyde **2e**

2e #1417 RT: 4.75 AV: 1 AV: 5 SB: 12 1410-1415 1419-1424 NL: 5.34E6  
 F: + c Full ms [50.00-650.00]

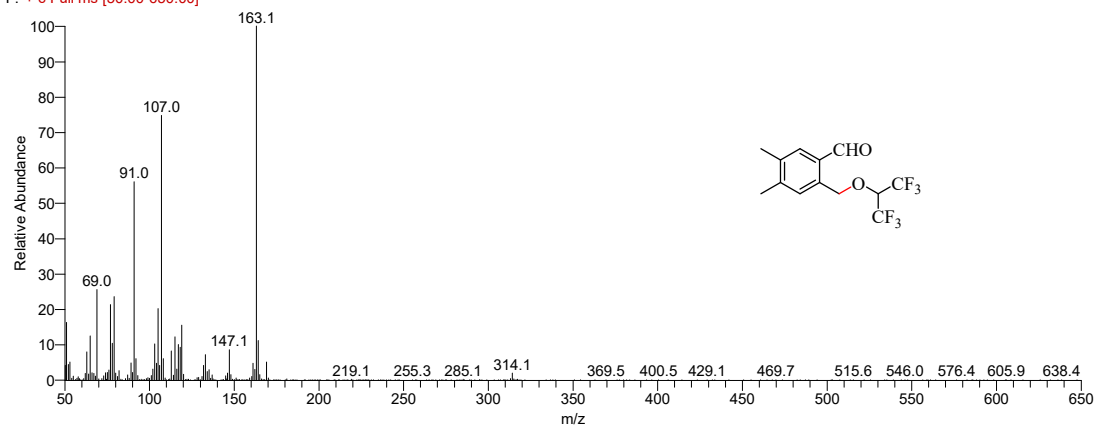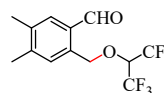

<sup>1</sup>H NMR of 2-(((1,1,1,3,3,3-hexafluoropropan-2-yl)oxy)methyl)-4,6-dimethylbenzaldehyde **2f**

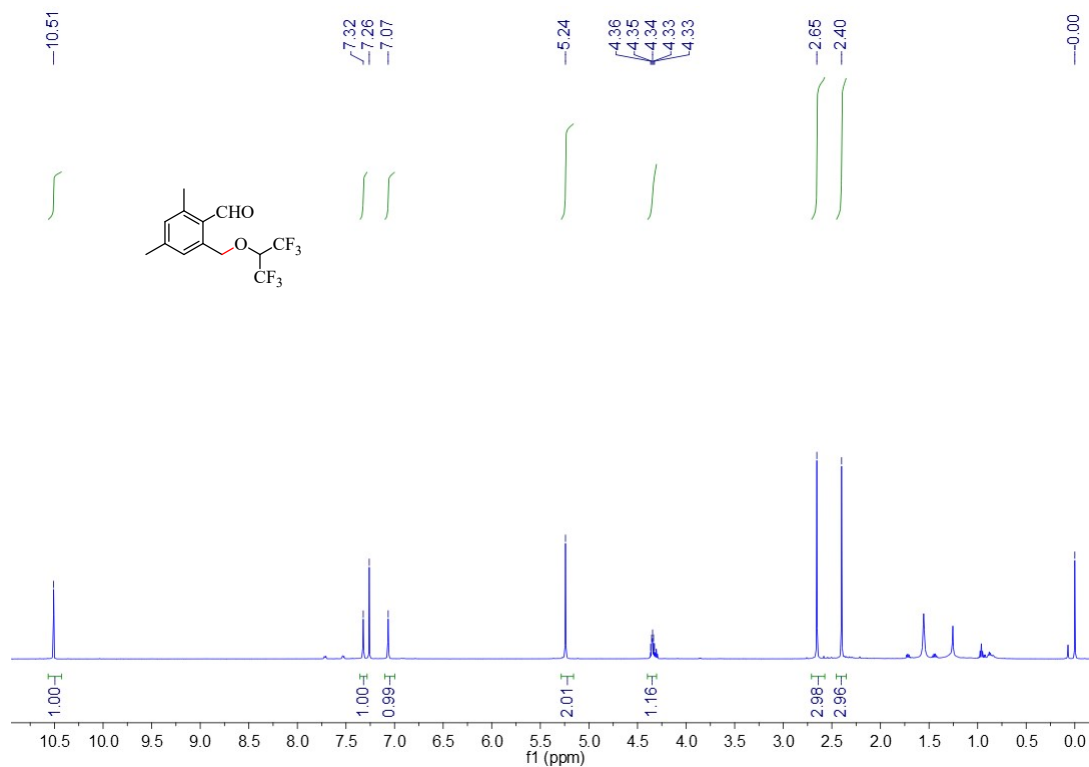

<sup>13</sup>C NMR of 2-((1,1,1,3,3,3-hexafluoropropan-2-yloxy)methyl)-4,6-dimethylbenzaldehyde **2f**

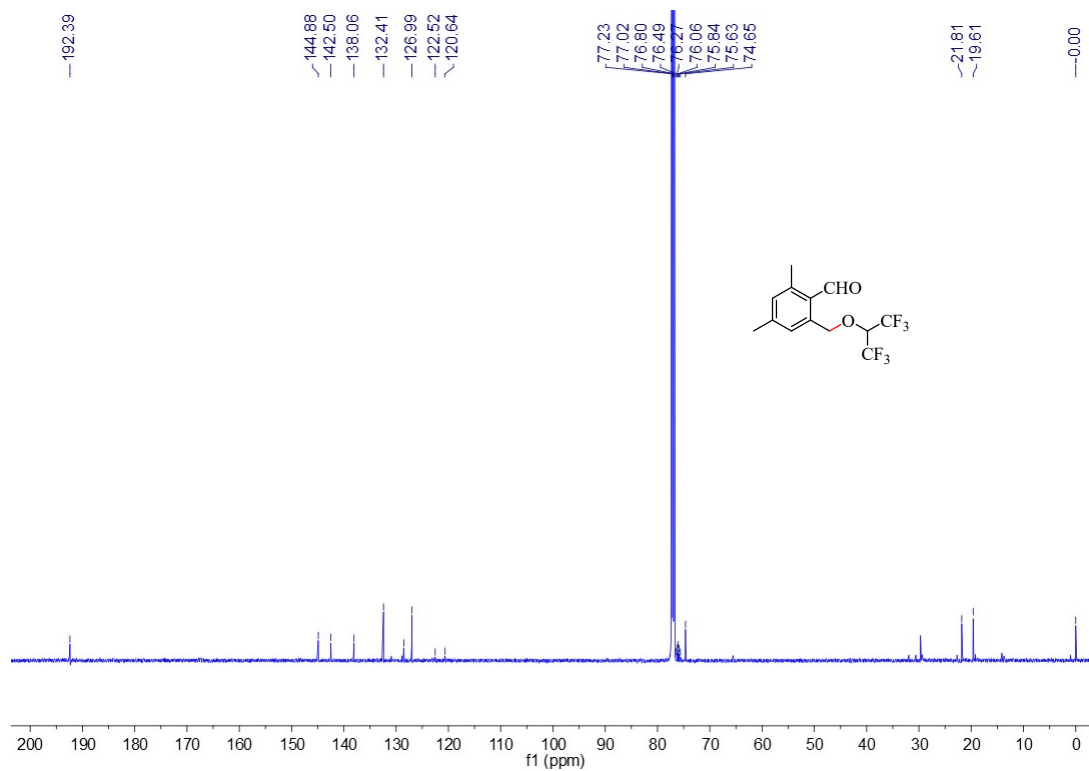

MS(EI) of 2-((1,1,1,3,3,3-hexafluoropropan-2-yloxy)methyl)-4,6-dimethylbenzaldehyde **2f**

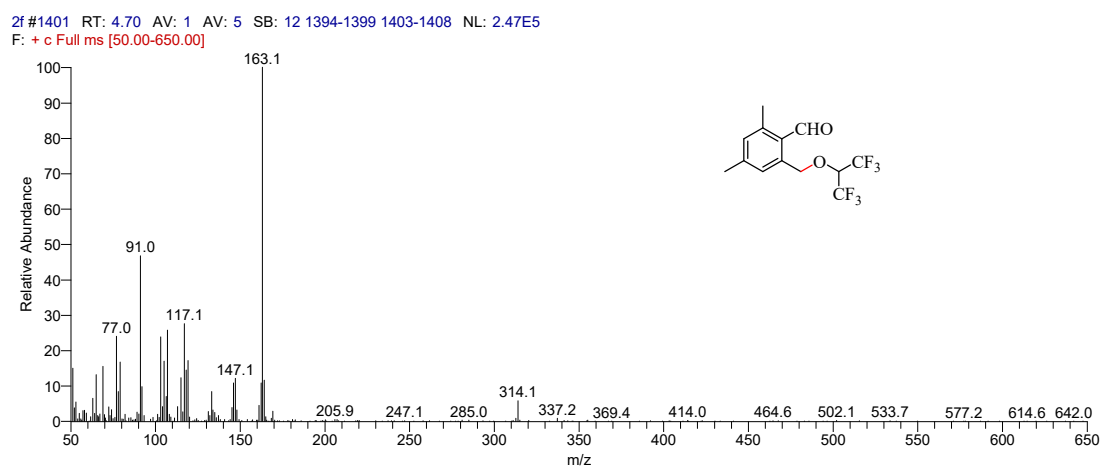



<sup>1</sup>H NMR of 2,6-bis(((1,1,1,3,3,3-hexafluoropropan-2-yl)oxy)methyl)-4-methylbenzaldehyde **2f**

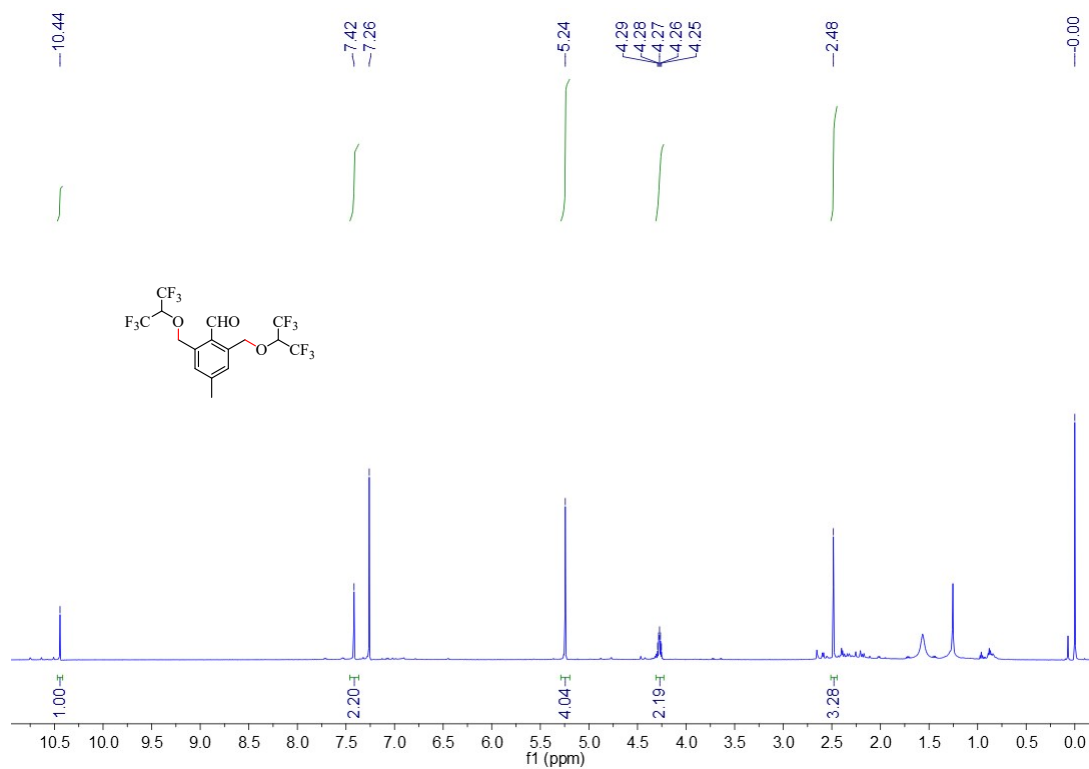

<sup>13</sup>C NMR of 2,6-bis(((1,1,1,3,3,3-hexafluoropropan-2-yl)oxy)methyl)-4-methylbenzaldehyde **2f**

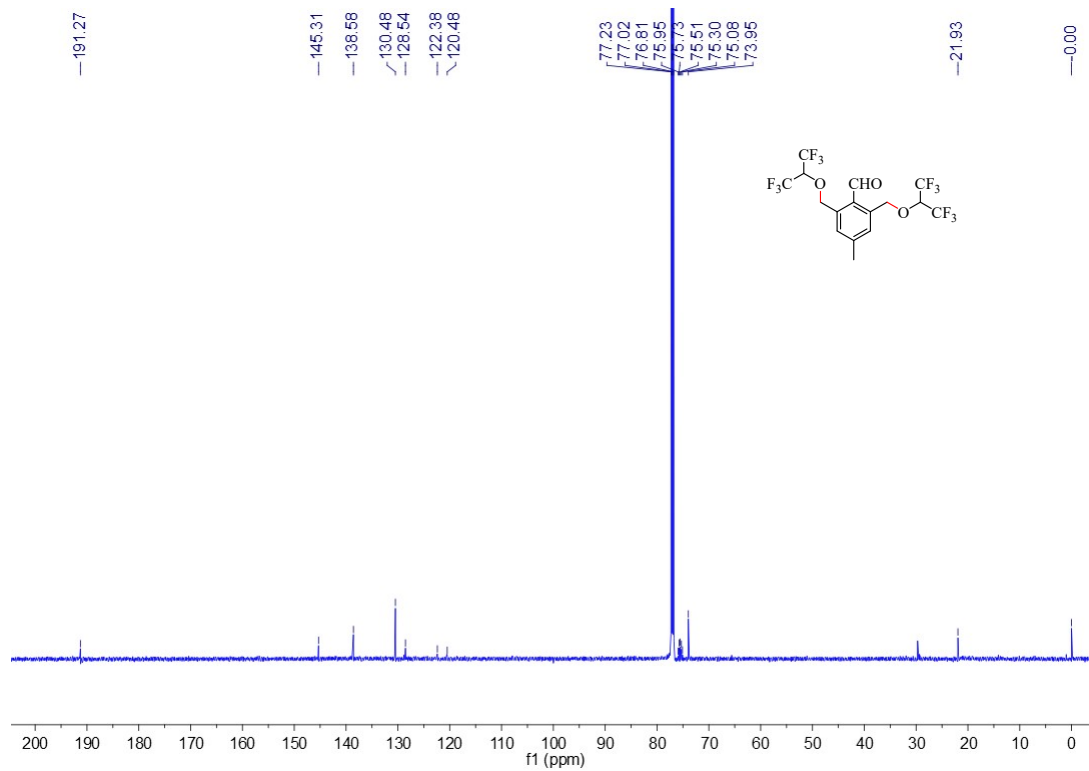

MS(EI) of 2,6-bis(((1,1,1,3,3,3-hexafluoropropan-2-yl)oxy)methyl)-4-methylbenzaldehyde **2f**

2f2 #1426 RT: 4.78 AV: 1 AV: 5 SB: 12 1419-1424 1428-1433 NL: 2.20E6  
 F: + c Full ms [50.00-650.00]

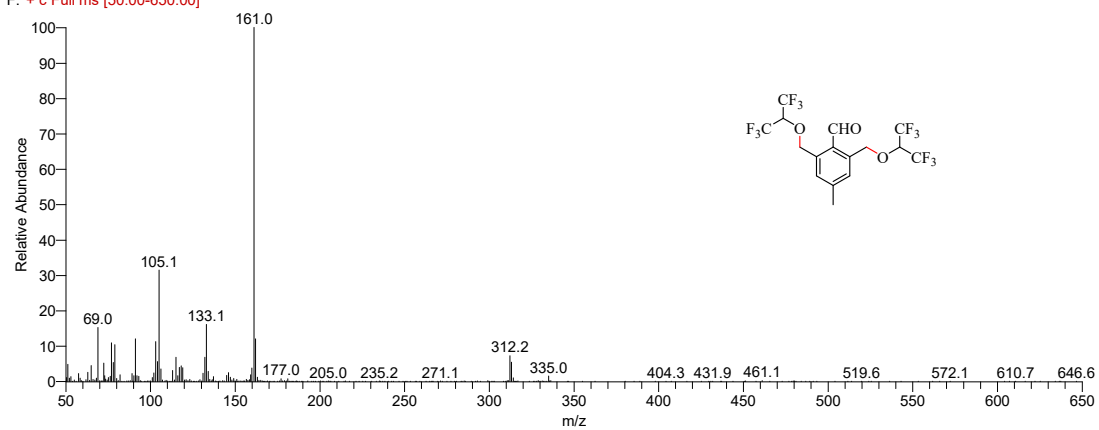

<sup>1</sup>H NMR of 2-(((1,1,1,3,3,3-hexafluoropropan-2-yl)oxy)methyl)-4-methoxybenzaldehyde **2g**

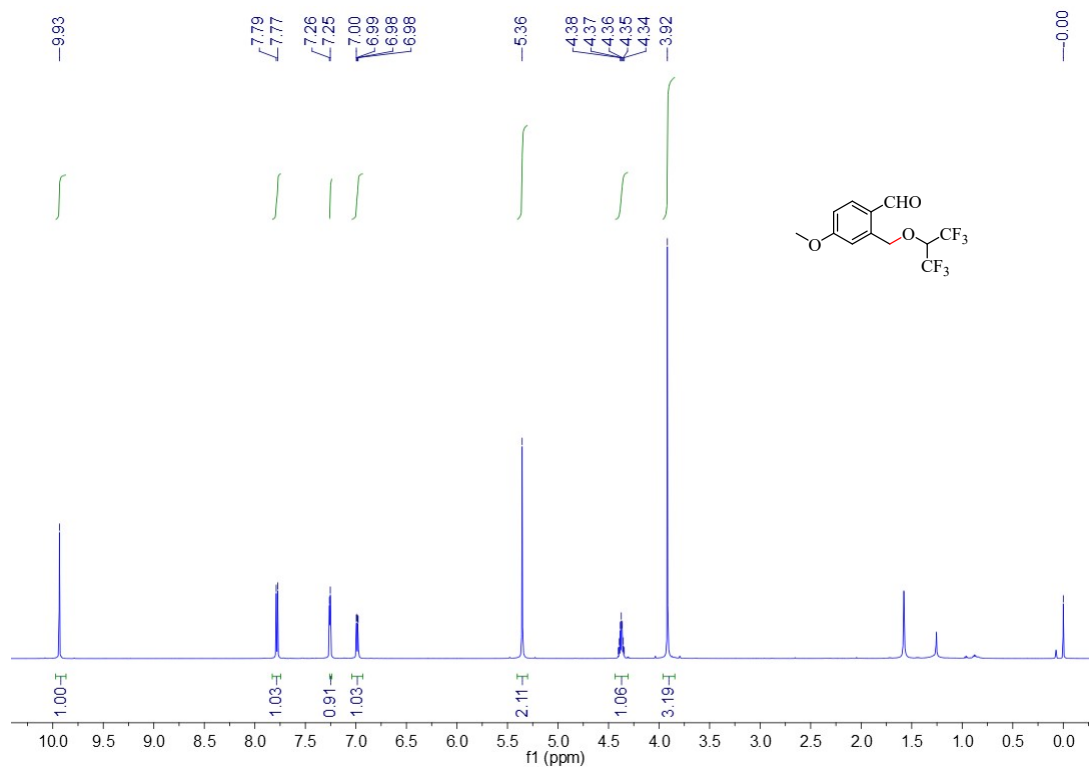

<sup>13</sup>C NMR of 2-(((1,1,1,3,3,3-hexafluoropropan-2-yl)oxy)methyl)-4-methoxybenzaldehyde **2g**

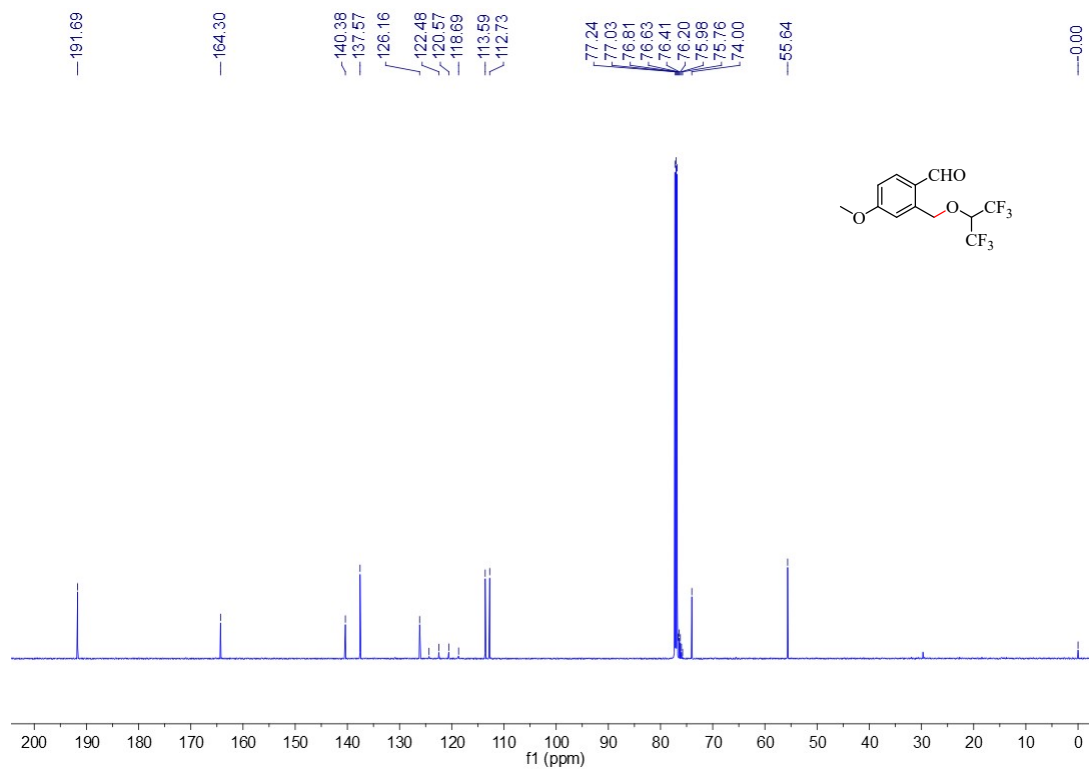

MS(EI) of 2-(((1,1,1,3,3,3-hexafluoropropan-2-yl)oxy)methyl)-4-methoxybenzaldehyde **2g**

2g #1433 RT: 4.80 AV: 1 AV: 5 SB: 12 1426-1431 1435-1440 NL: 2.44E7  
F: + c Full ms [50.00-650.00]

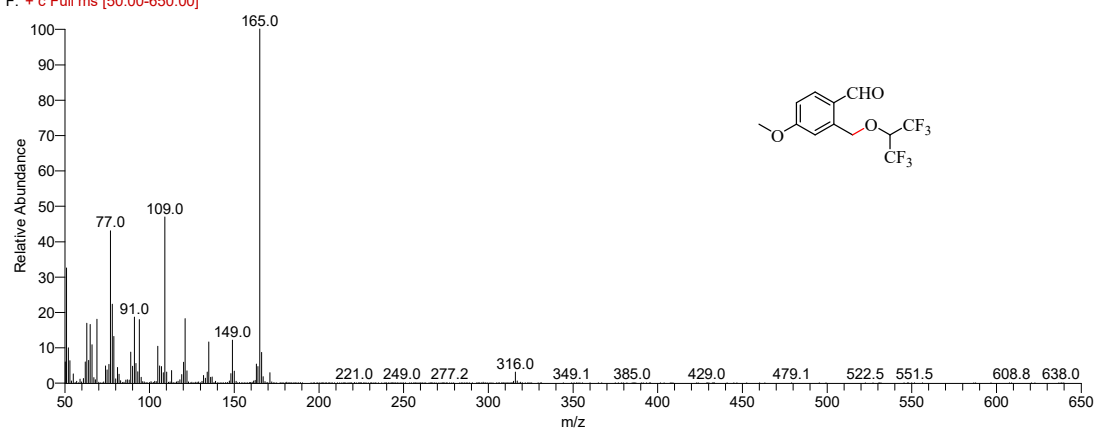

<sup>1</sup>H NMR of 2-((1,1,1,3,3,3-hexafluoropropan-2-yloxy)methyl)-3-fluorobenzaldehyde **2h**

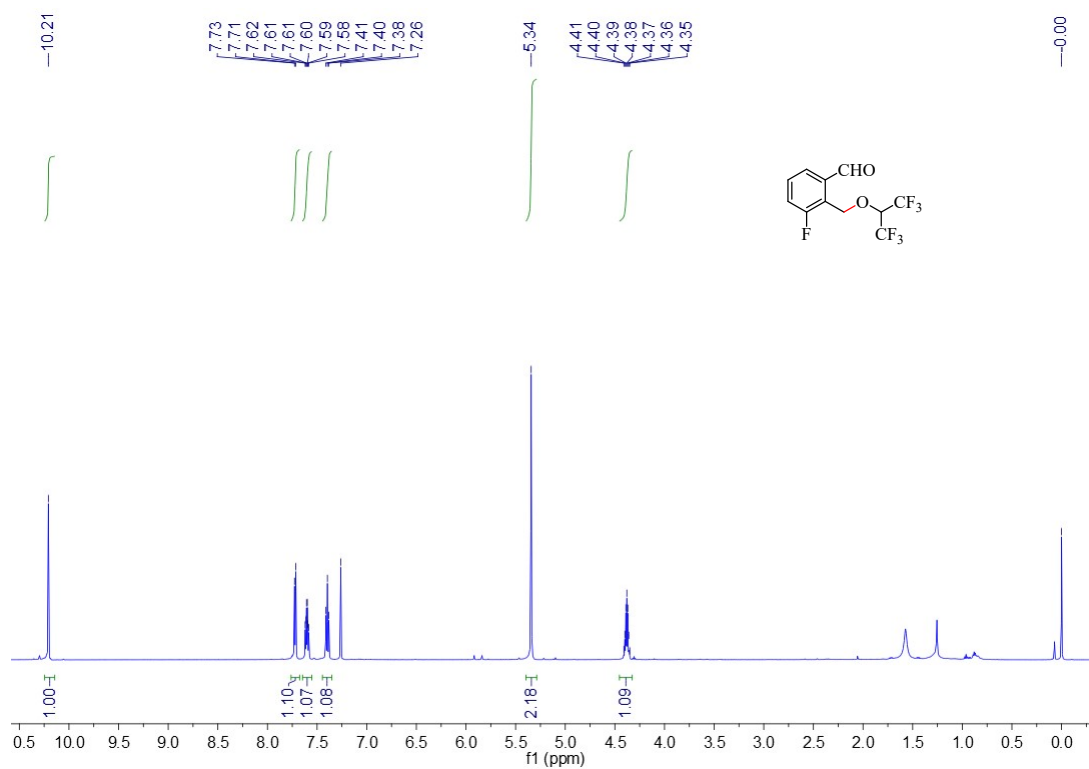

<sup>13</sup>C NMR of 2-((1,1,1,3,3,3-hexafluoropropan-2-yloxy)methyl)-3-fluorobenzaldehyde **2h**

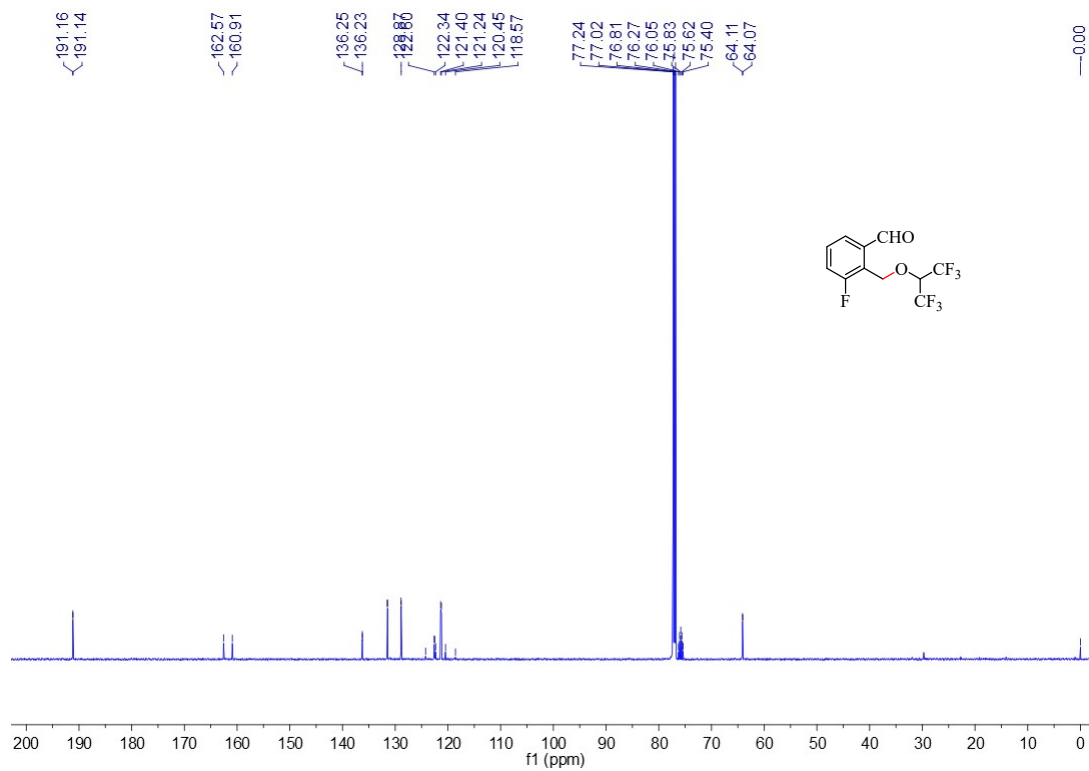

MS(EI) of 2-((1,1,1,3,3,3-hexafluoropropan-2-yloxy)methyl)-3-fluorobenzaldehyde **2h**

2h #1231 RT: 4.14 AV: 1 SB: 12 1224-1229 1233-1238 NL: 9.00E5  
F: + c Full ms [50.00-650.00]

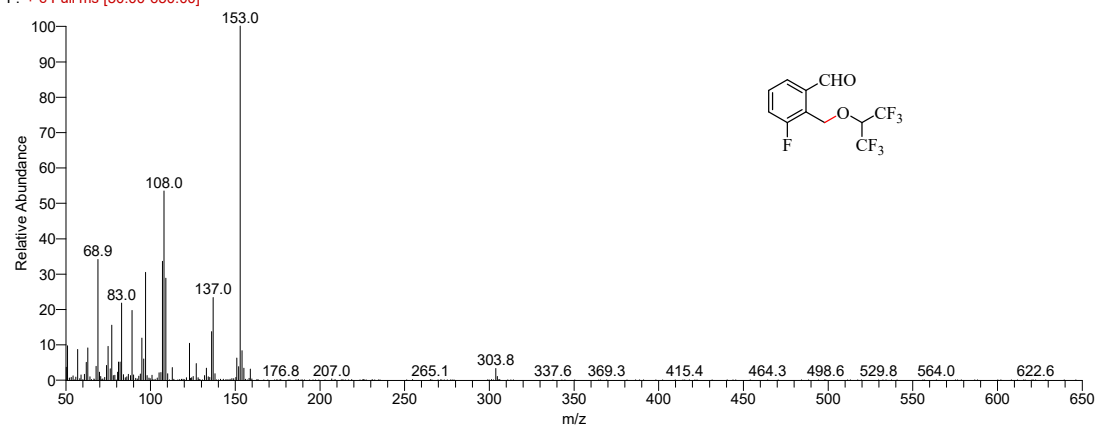

<sup>1</sup>H NMR of 2-((1,1,1,3,3,3-hexafluoropropan-2-yloxy)methyl)-4-fluorobenzaldehyde **2i**

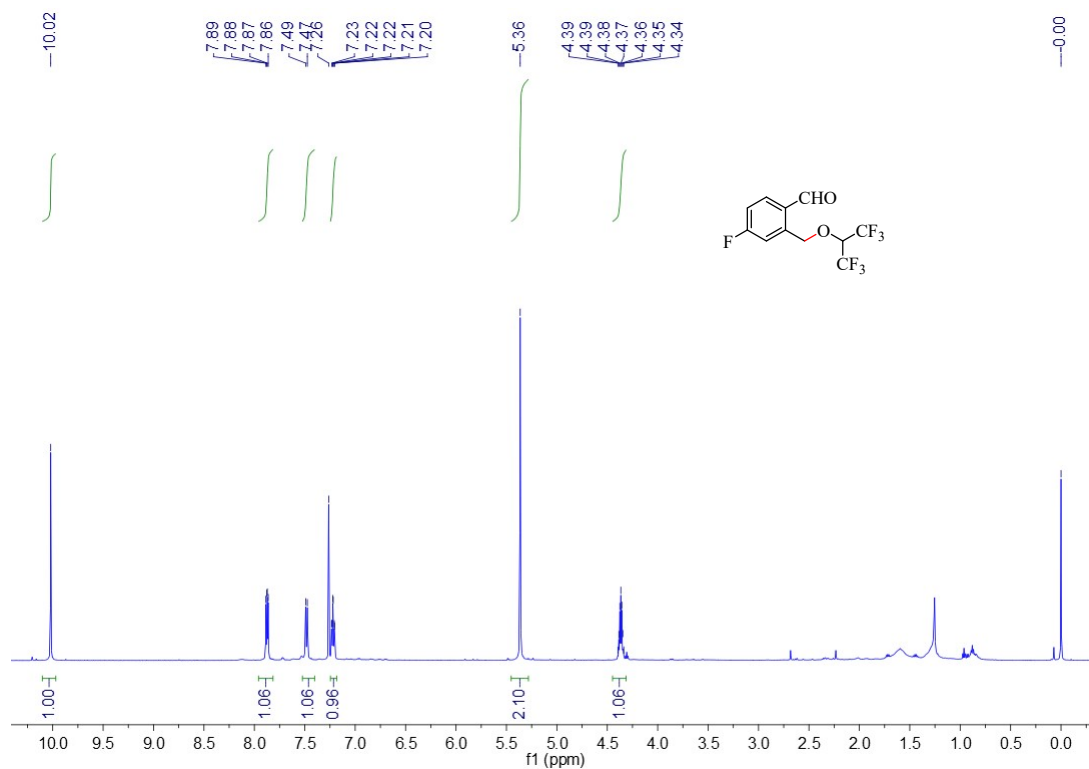

<sup>13</sup>C NMR of 2-((1,1,1,3,3,3-hexafluoropropan-2-yloxy)methyl)-4-fluorobenzaldehyde **2i**

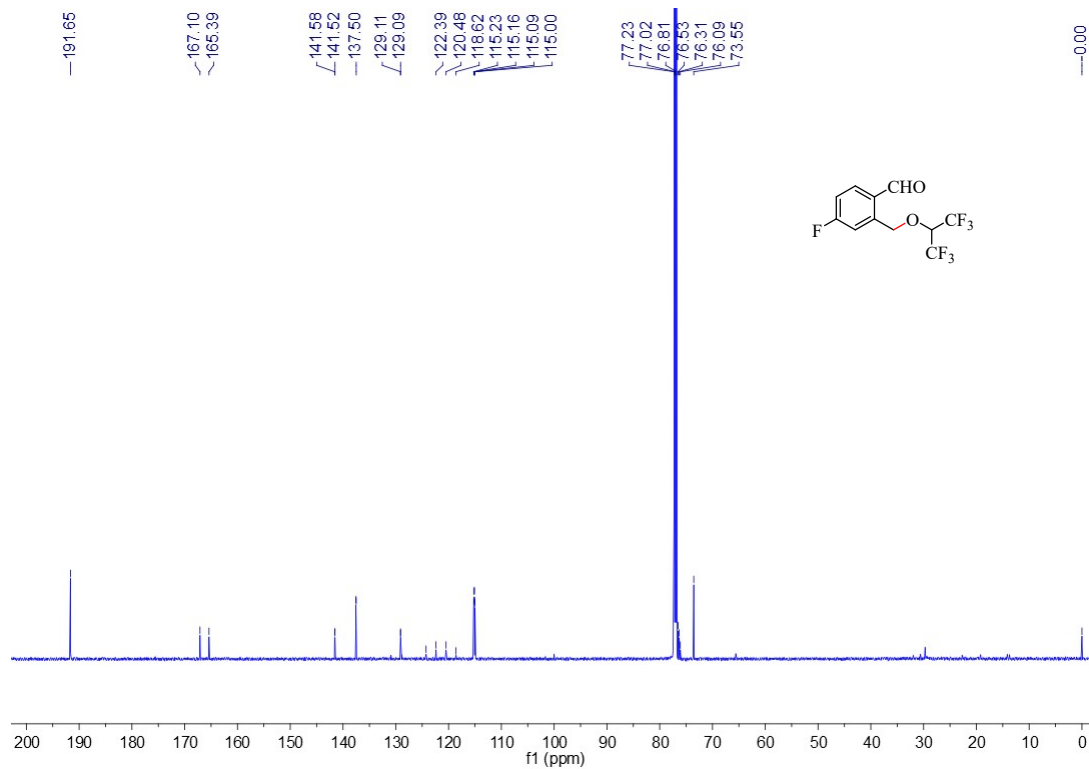

MS(EI) of 2-((1,1,1,3,3,3-hexafluoropropan-2-yloxy)methyl)-4-fluorobenzaldehyde **2i**

**2i** #1210 RT: 4.07 AV: 1 AV: 5 SB: 12 1203-1208 1212-1217 NL: 3.55E5  
F: + c Full ms [50.00-650.00]

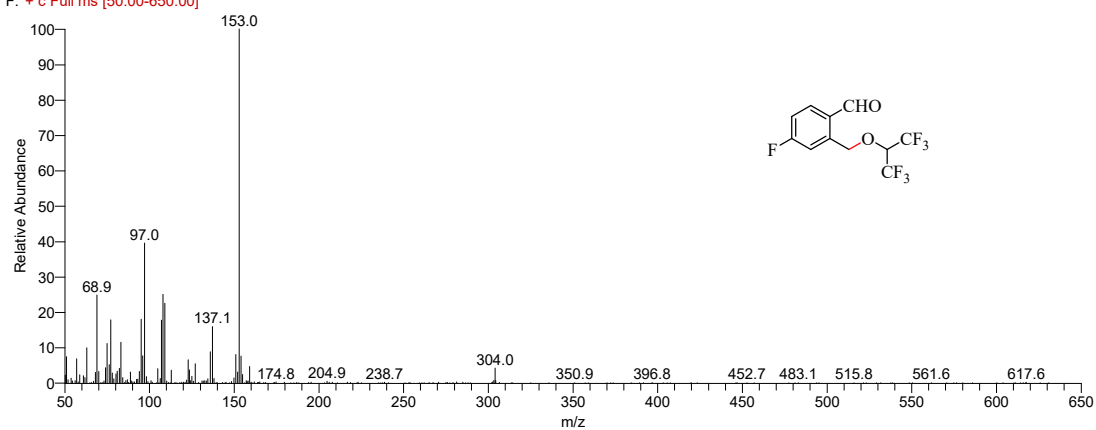

<sup>1</sup>H NMR of 2-((1,1,1,3,3,3-hexafluoropropan-2-yloxy)methyl)-3-chlorobenzaldehyde **2j**

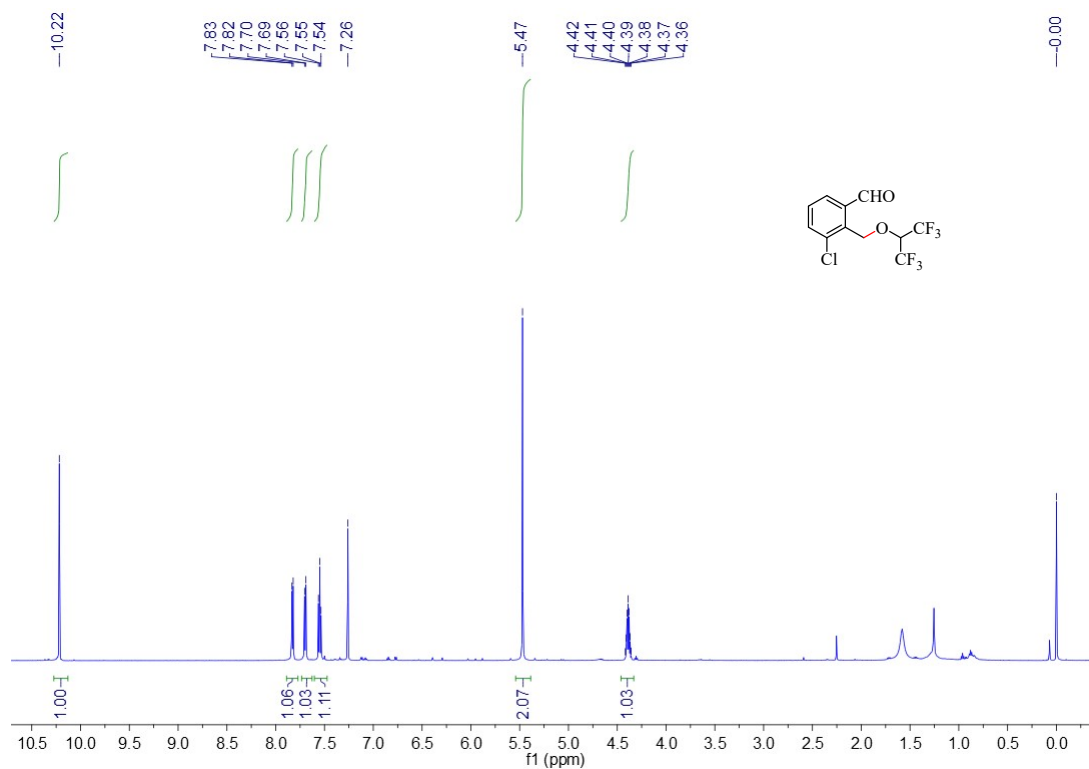

<sup>13</sup>C NMR of 2-((1,1,1,3,3,3-hexafluoropropan-2-yloxy)methyl)-3-chlorobenzaldehyde **2j**

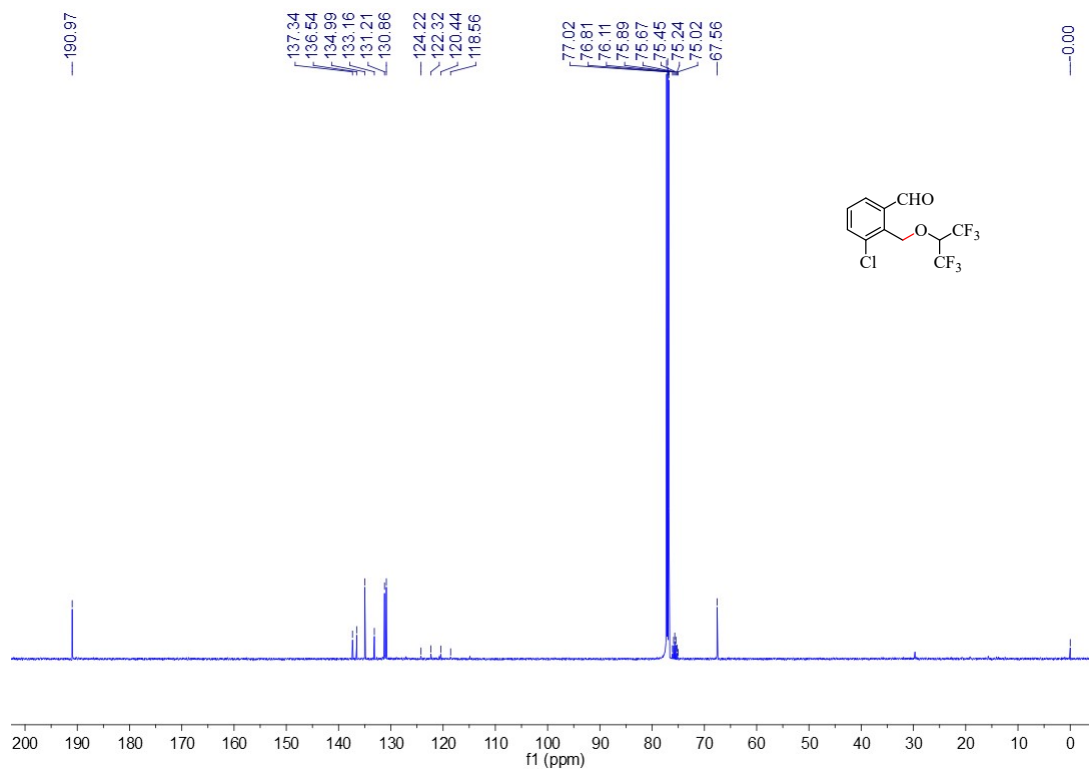

MS(EI) of 2-((1,1,1,3,3,3-hexafluoropropan-2-yloxy)methyl)-3-chlorobenzaldehyde **2j**

2j #1376 RT: 4.62 AV: 1 AV: 5 SB: 12 1369-1374 1378-1383 NL: 3.17E5  
F: + c Full ms [50.00-650.00]

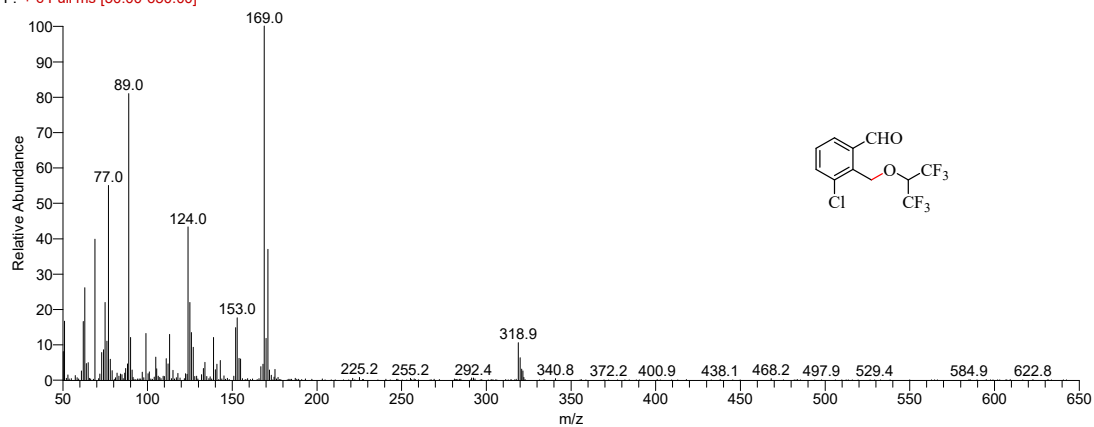

<sup>1</sup>H NMR of 2-((1,1,1,3,3,3-hexafluoropropan-2-yloxy)methyl)-4-chlorobenzaldehyde **2k**

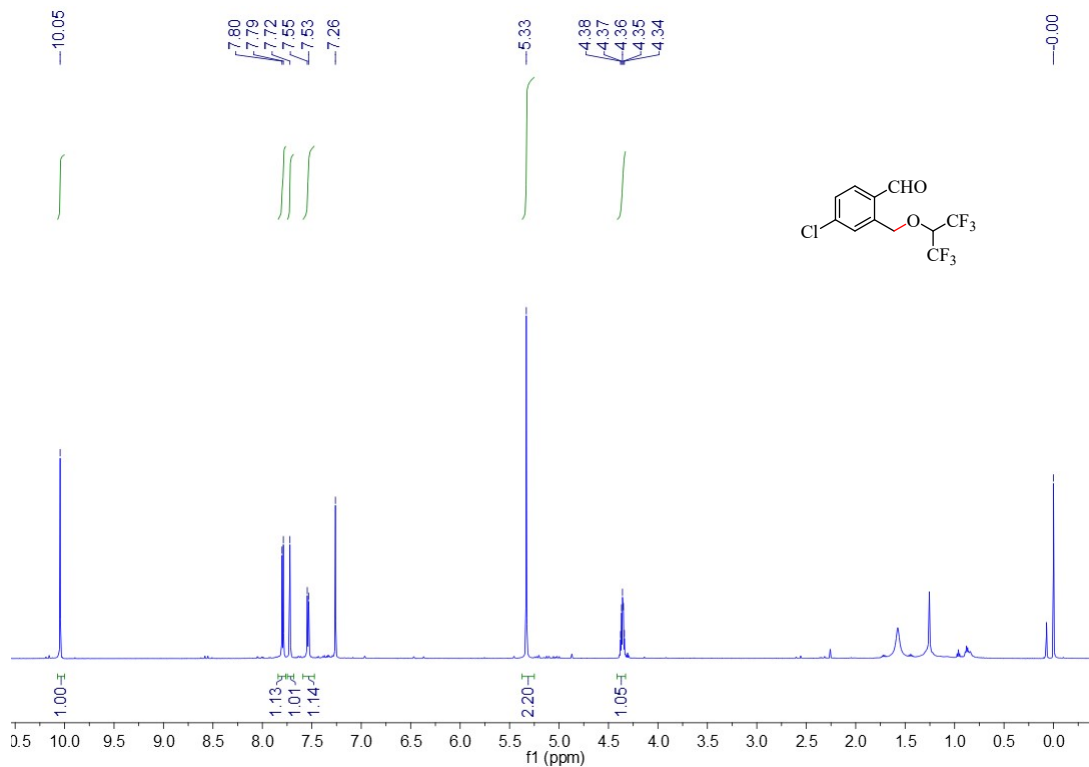



<sup>13</sup>C NMR of 2-((1,1,1,3,3,3-hexafluoropropan-2-yloxy)methyl)-4-chlorobenzaldehyde **2k**

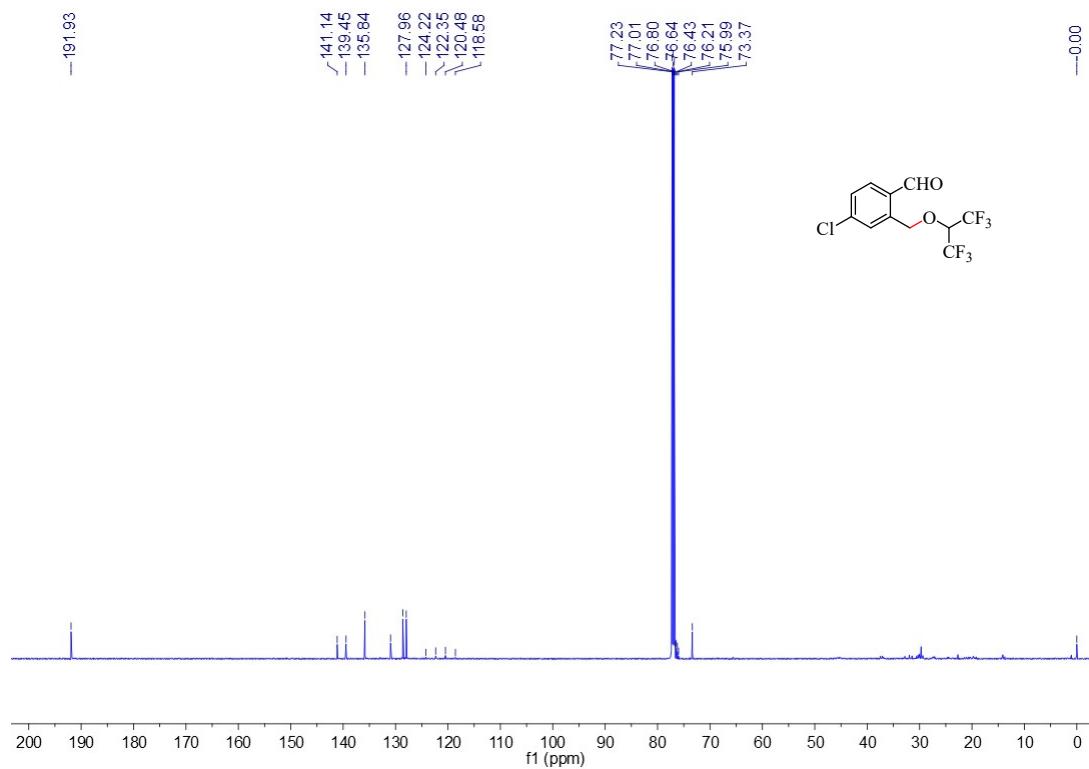

MS(EI) of 2-((1,1,1,3,3,3-hexafluoropropan-2-yloxy)methyl)-4-chlorobenzaldehyde **2k**

2k #1367 RT: 4.59 AV: 1 AV: 5 SB: 12 1360-1365 1369-1374 NL: 5.91E6  
F: + c Full ms [50.00-650.00]

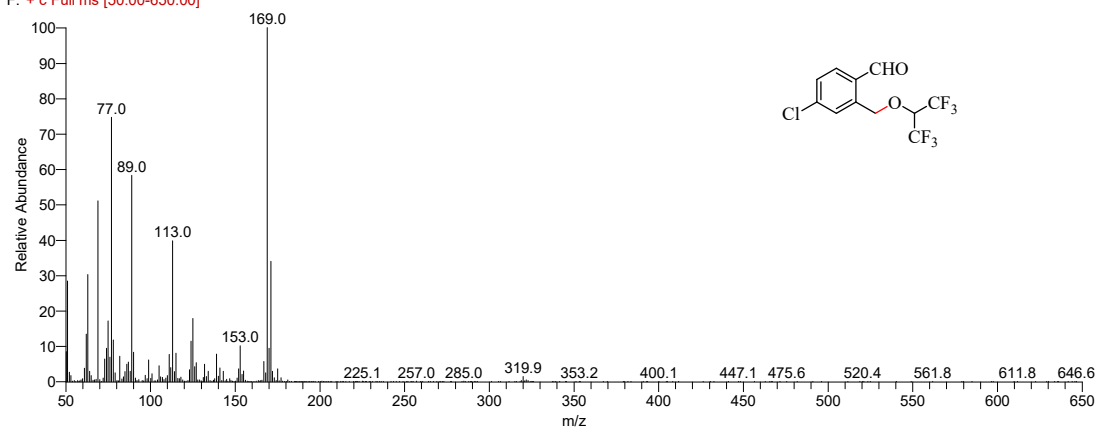

<sup>1</sup>H NMR of 2-((1,1,1,3,3,3-hexafluoropropan-2-yl)oxy)methyl-6-chlorobenzaldehyde **21**

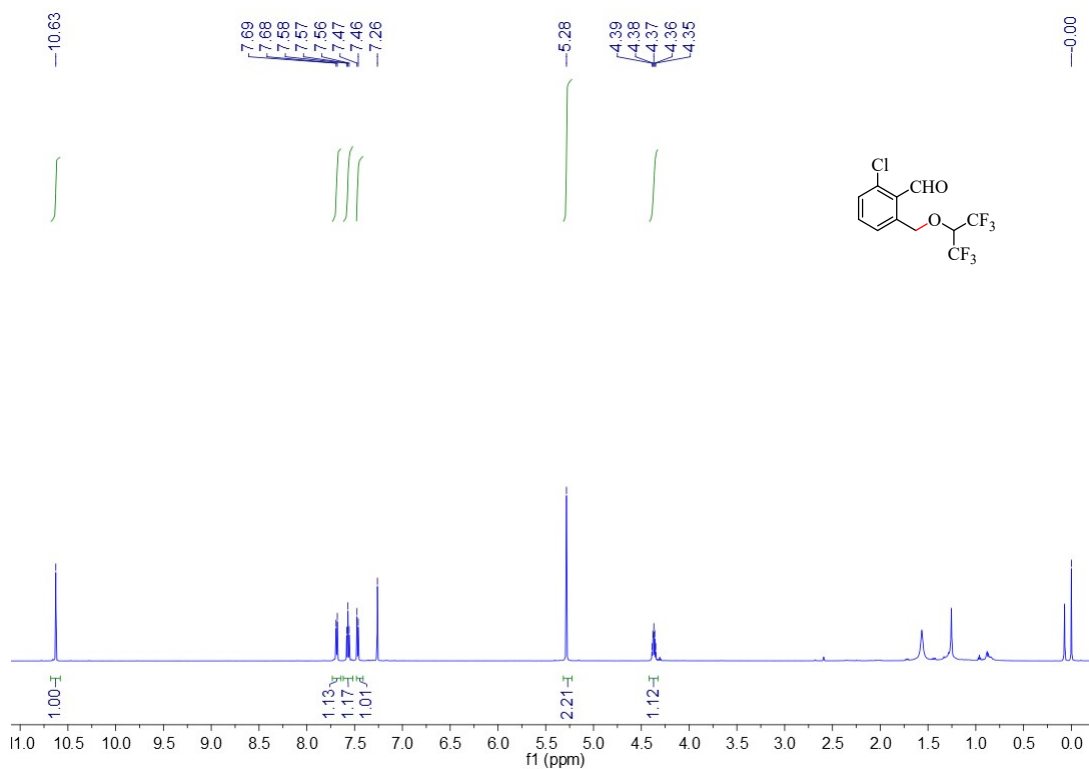

<sup>13</sup>C NMR of 2-((1,1,1,3,3,3-hexafluoropropan-2-yl)oxy)methyl-6-chlorobenzaldehyde **21**

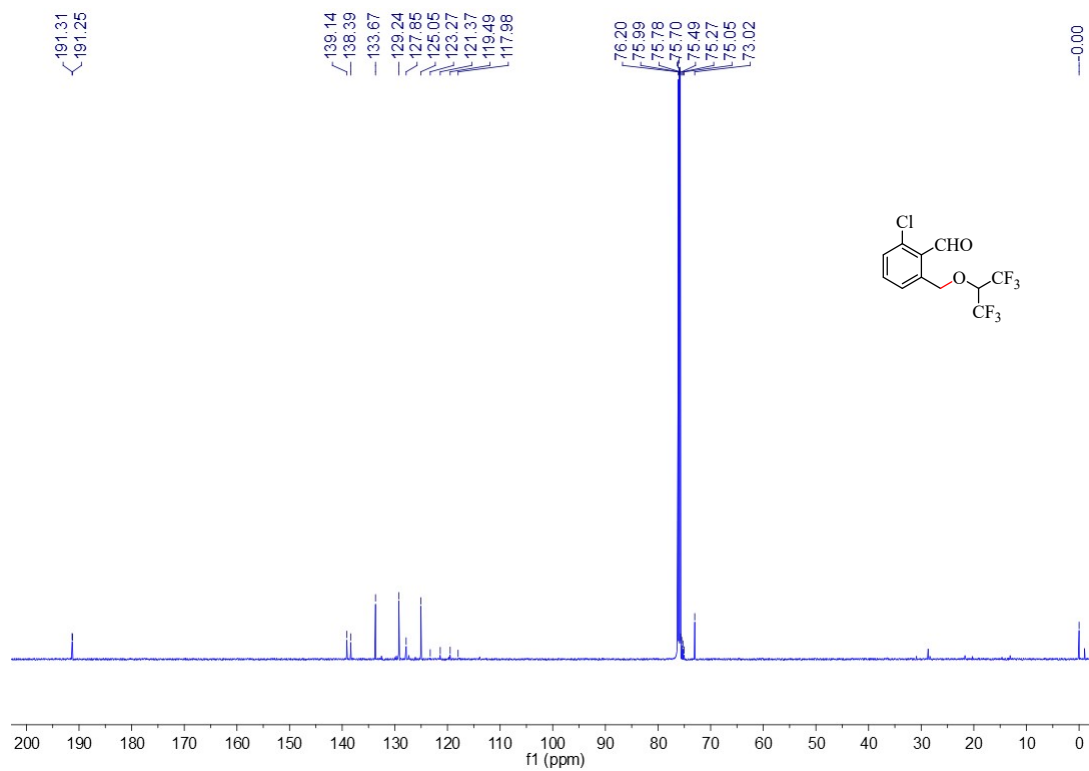

MS(EI) of 2-((1,1,1,3,3,3-hexafluoropropan-2-yloxy)methyl)-6-chlorobenzaldehyde **2l**

2l #1348 RT: 4.52 AV: 1 AV: 5 SB: 12 1341-1346 1350-1355 NL: 7.48E6  
 F: + c Full ms [50.00-650.00]

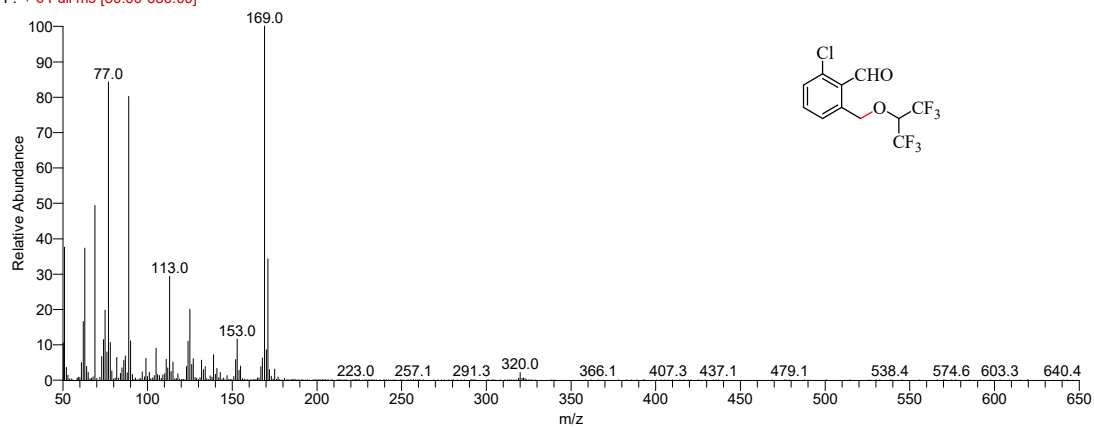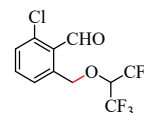

<sup>1</sup>H NMR of 2-((1,1,1,3,3,3-hexafluoropropan-2-yloxy)methyl)-4-bromobenzaldehyde **2m**

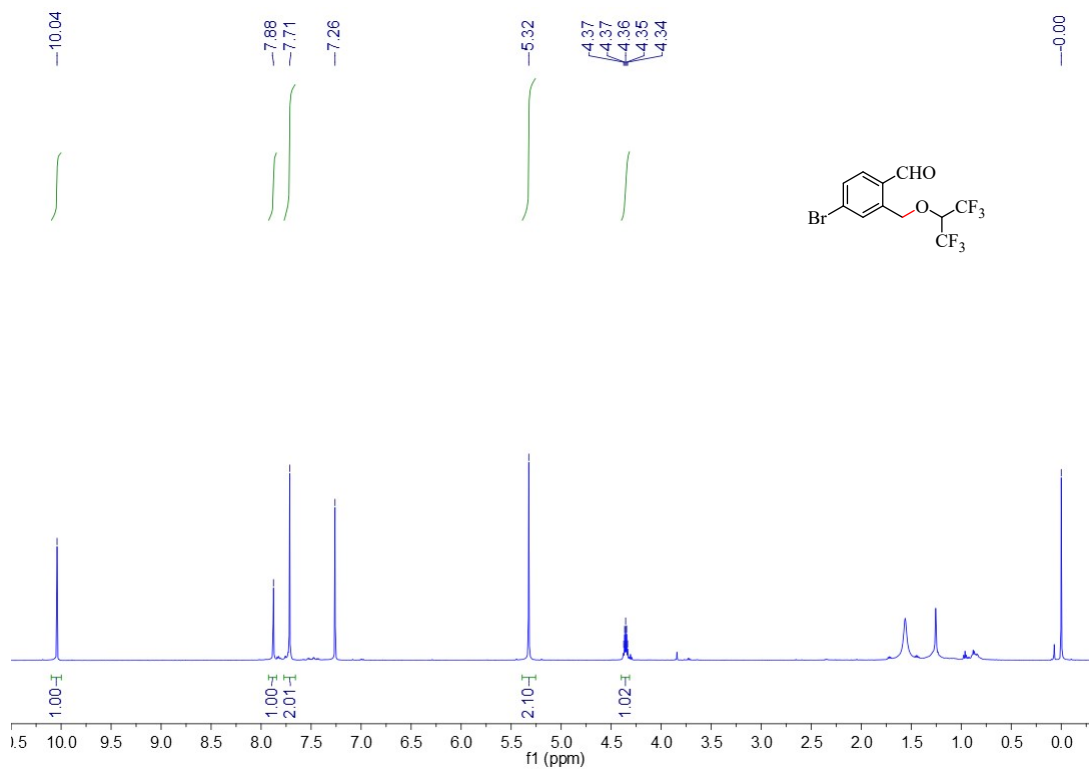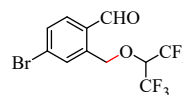

<sup>13</sup>C NMR of 2-((1,1,1,3,3,3-hexafluoropropan-2-yloxy)methyl)-4-bromobenzaldehyde **2m**

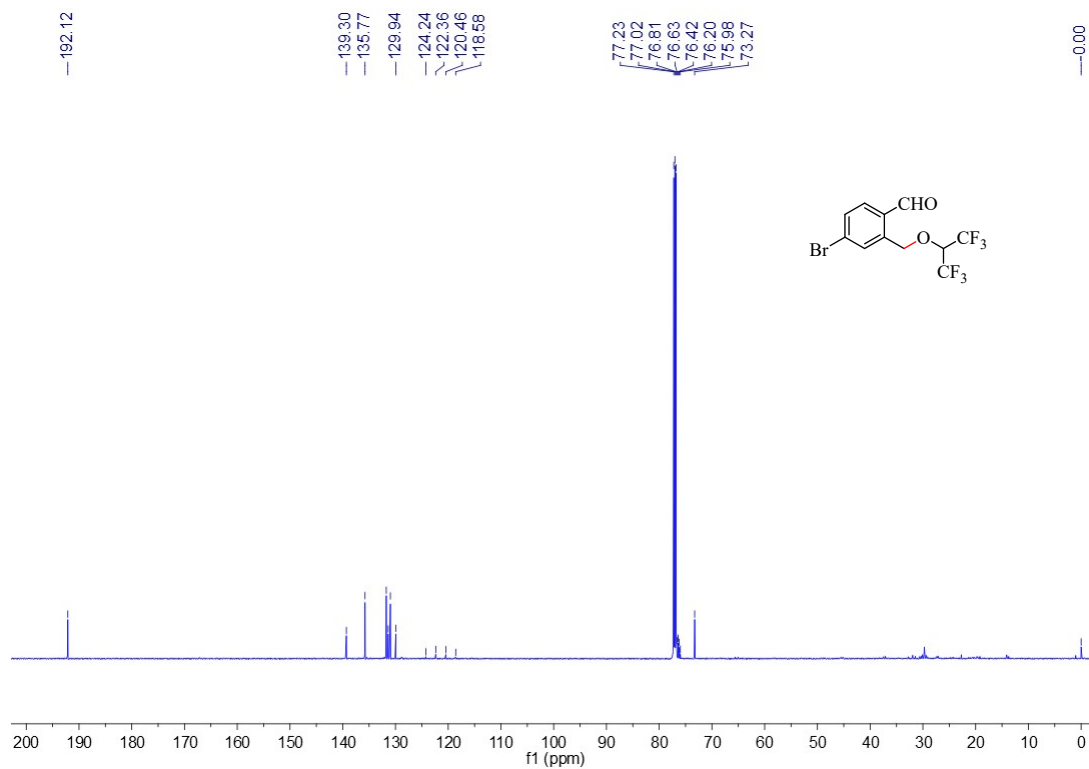

MS(EI) of 2-((1,1,1,3,3,3-hexafluoropropan-2-yloxy)methyl)-4-bromobenzaldehyde **2m**

2m #1452 RT: 4.87 AV: 1 AV: 5 SB: 12 1445-1450 1454-1459 NL: 9.53E7  
F: + c Full ms [50.00-650.00]

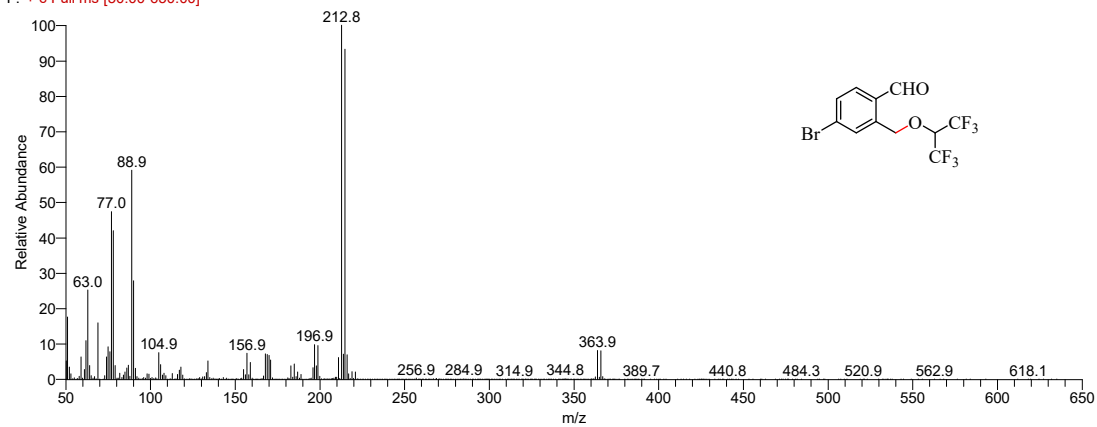

<sup>1</sup>H NMR of 2-((1,1,1,3,3,3-hexafluoropropan-2-yl)oxy)methyl-5-bromobenzaldehyde **2n**

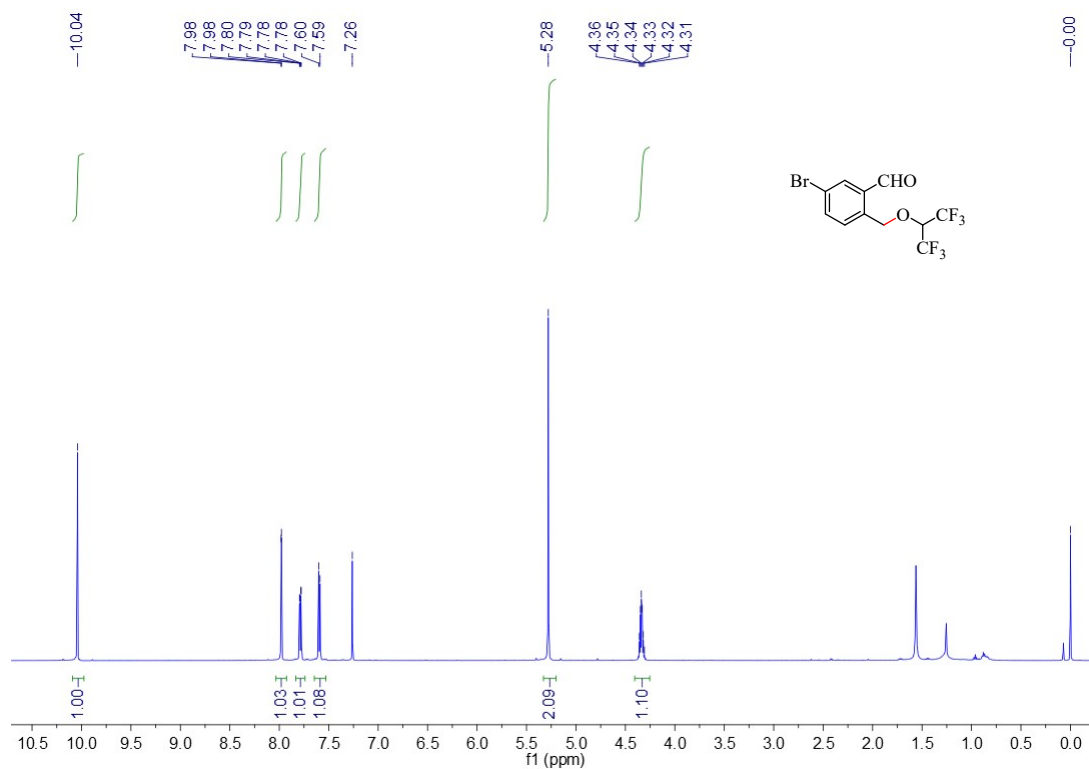

<sup>13</sup>C NMR of 2-((1,1,1,3,3,3-hexafluoropropan-2-yl)oxy)methyl-5-bromobenzaldehyde **2n**

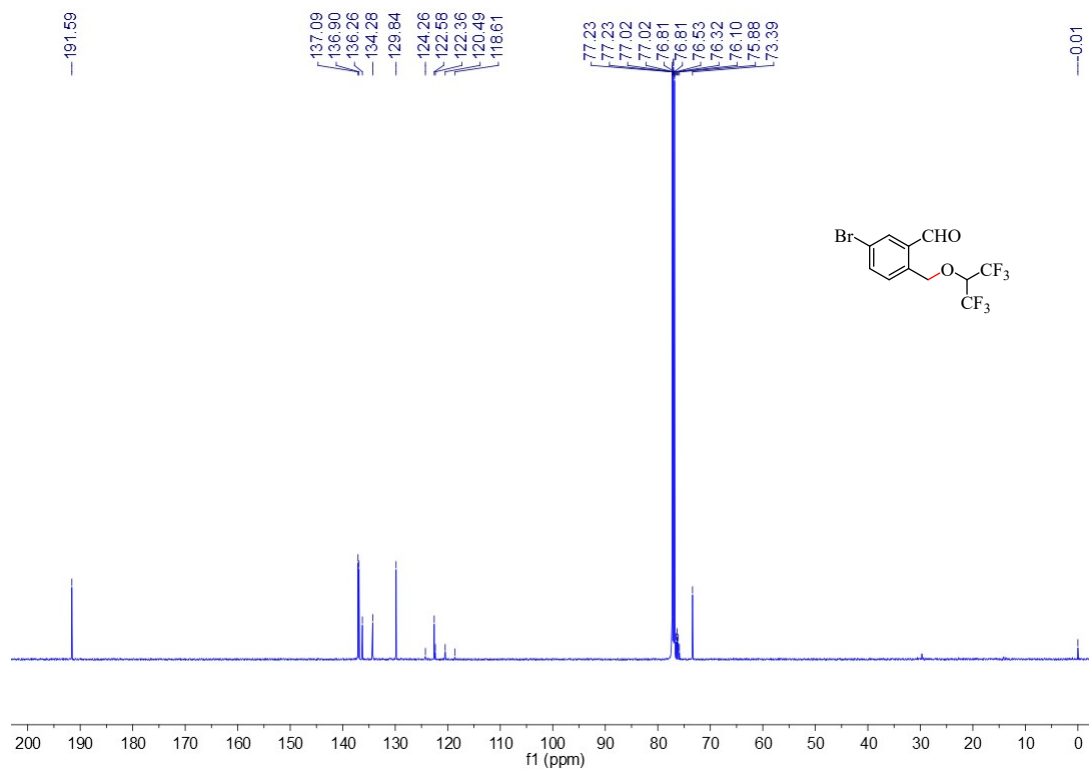

MS(EI) of 2-((1,1,1,3,3,3-hexafluoropropan-2-yloxy)methyl)-5-bromobenzaldehyde **2n**

2n #1447 RT: 4.85 AV: 1 AV: 5 SB: 12 1440-1445 1449-1454 NL: 1.45E7  
F: + c Full ms [50.00-650.00]

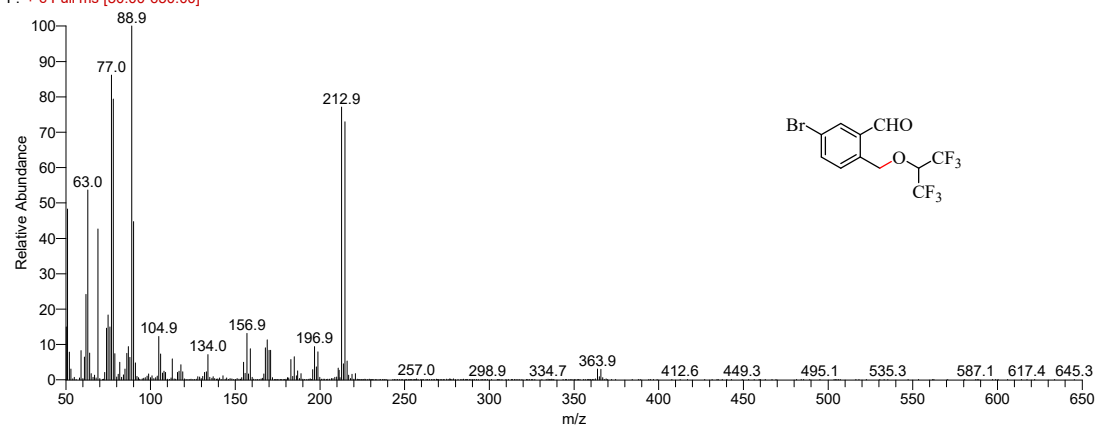

<sup>1</sup>H NMR of 4-bromo-2-(((1,1,1,3,3,3-hexafluoropropan-2-yl)oxy)methyl)-6-methylbenzaldehyde **2o**

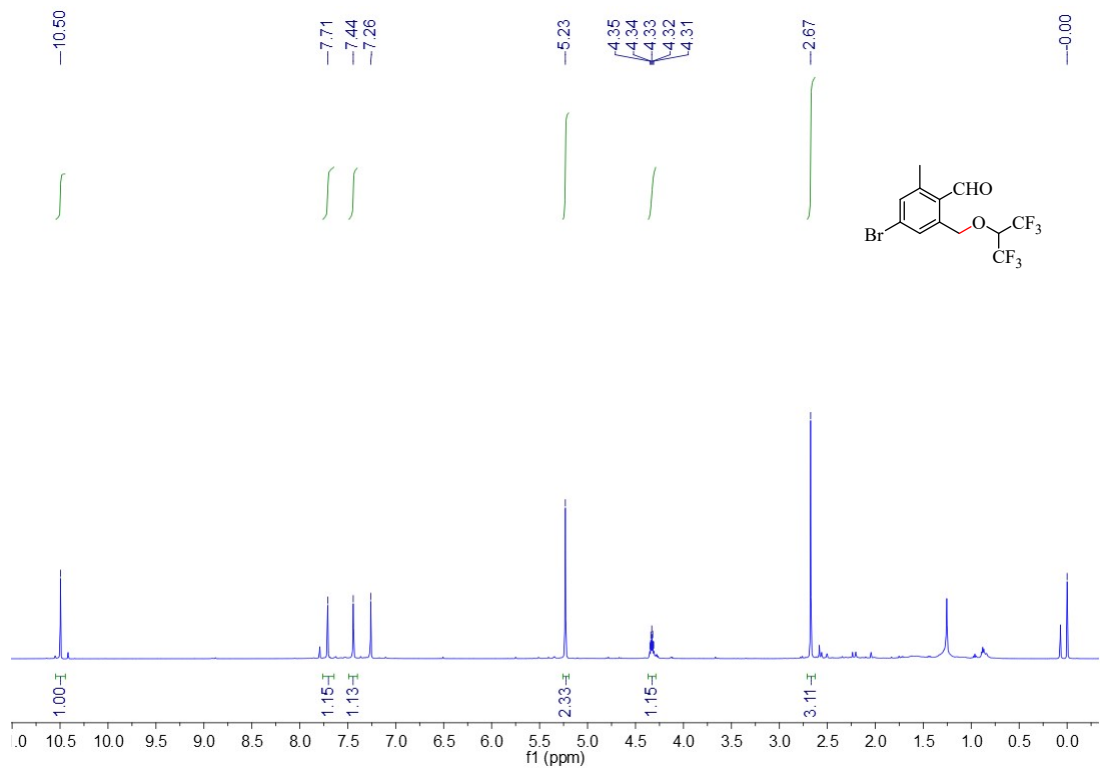

<sup>13</sup>C NMR of 4-bromo-2-(((1,1,1,3,3,3-hexafluoropropan-2-yl)oxy)methyl)-6-methylbenzaldehyde **2o**

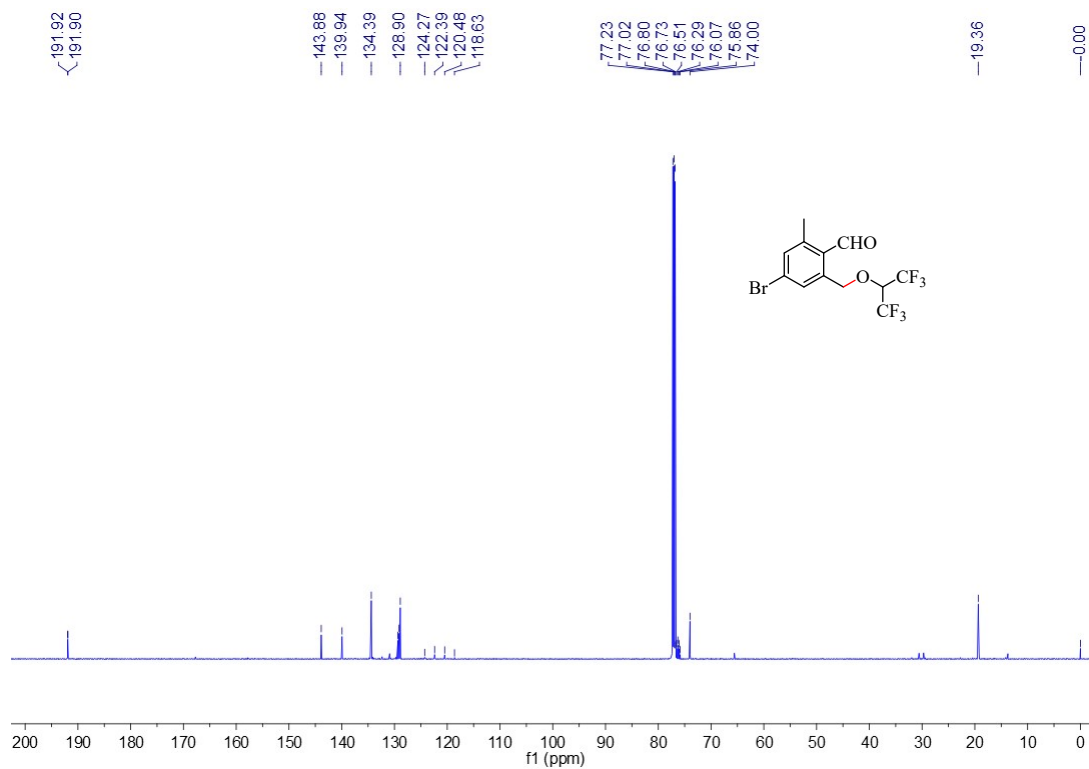

MS(EI) of 4-bromo-2-(((1,1,1,3,3,3-hexafluoropropan-2-yl)oxy)methyl)-6-methylbenzaldehyde **2o**

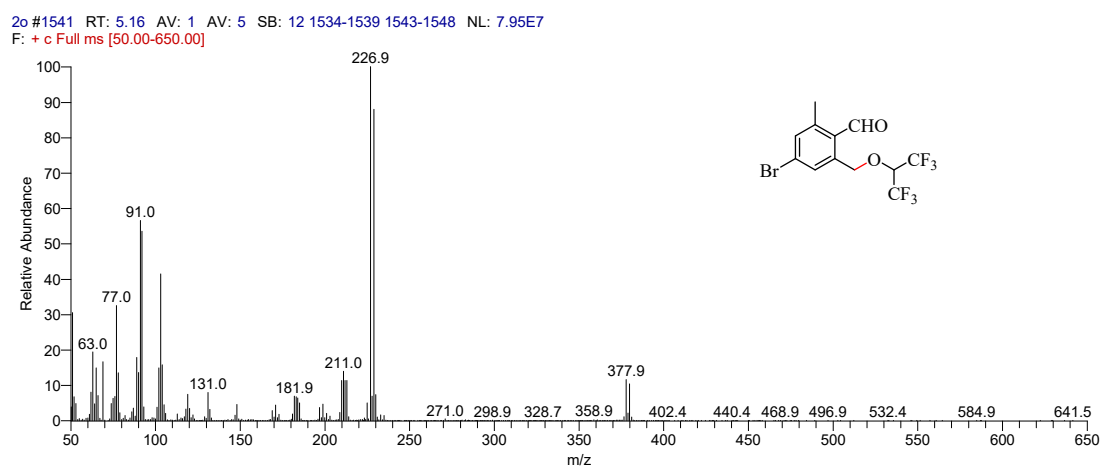

<sup>1</sup>H NMR of 2-((1,1,1,3,3,3-hexafluoropropan-2-yl)oxy)-6-methylbenzaldehyde **3a**

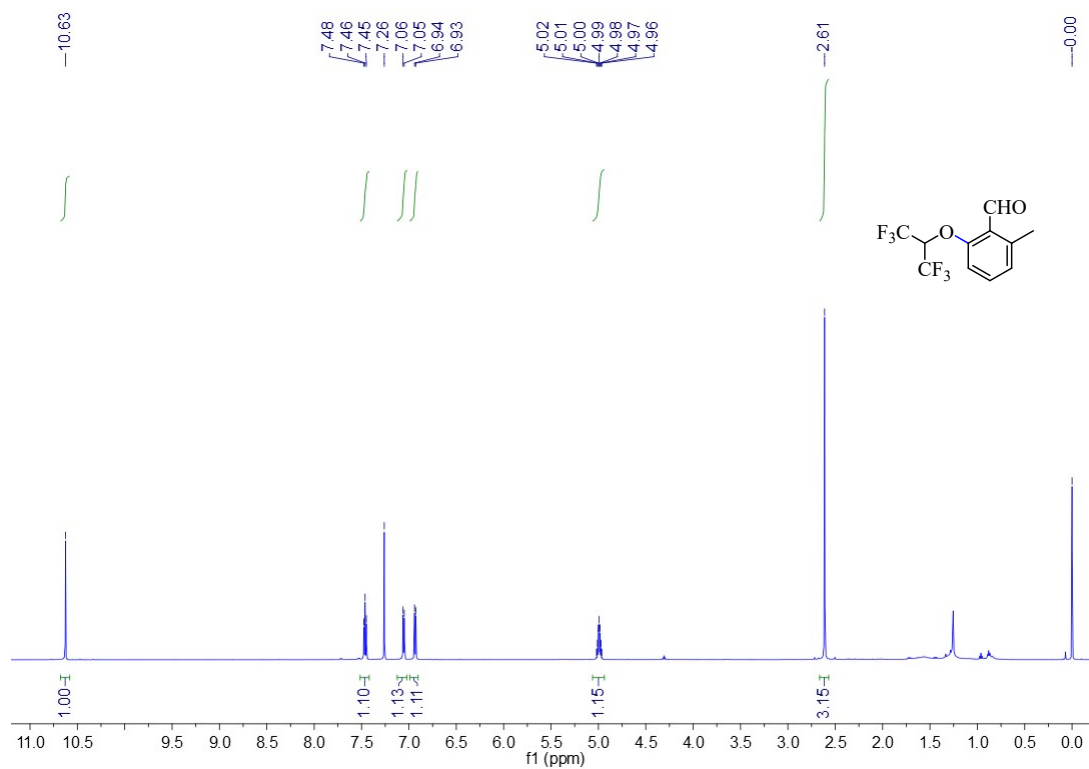

<sup>13</sup>C NMR of 2-((1,1,1,3,3,3-hexafluoropropan-2-yl)oxy)-6-methylbenzaldehyde **3a**

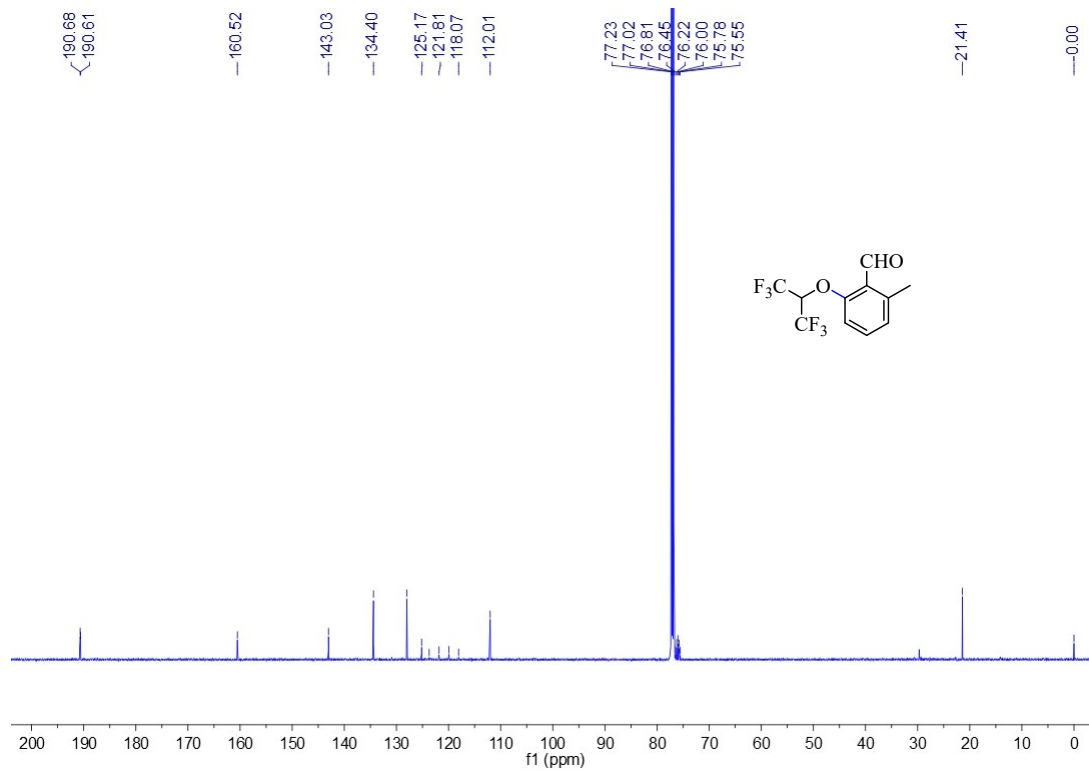



$^{19}\text{F}$  NMR of 2-((1,1,1,3,3,3-hexafluoropropan-2-yl)oxy)-6-methylbenzaldehyde **3a**

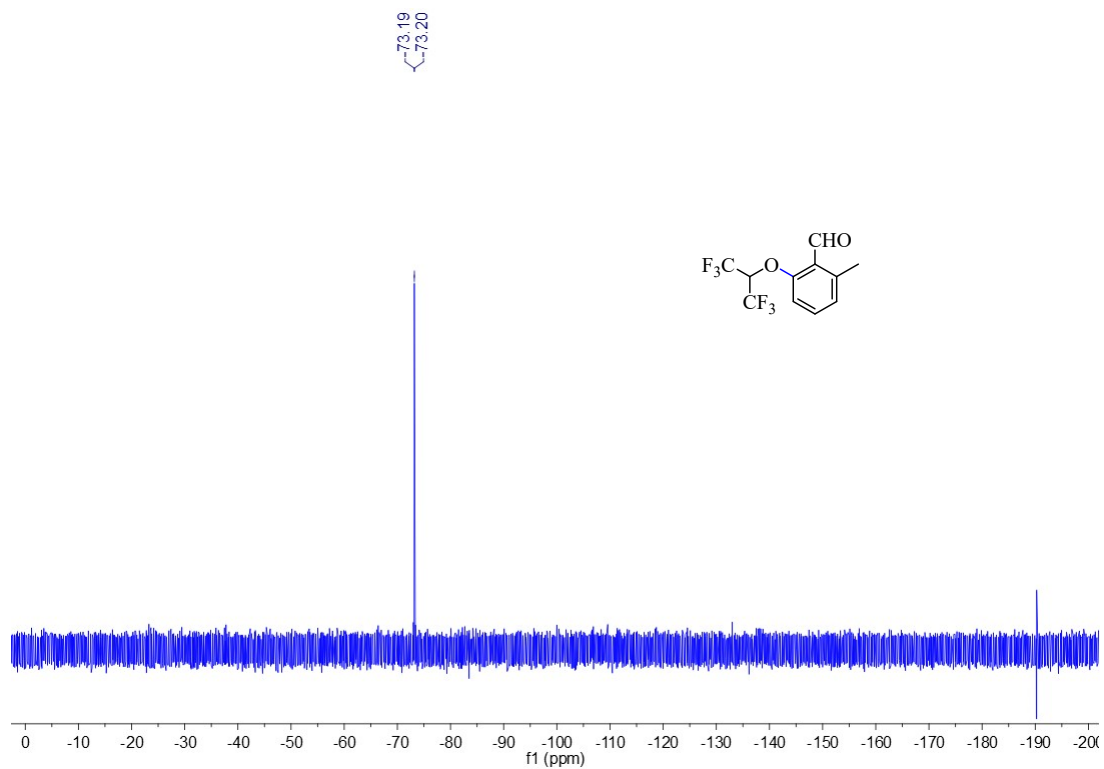

MS(EI) of 2-((1,1,1,3,3,3-hexafluoropropan-2-yl)oxy)-6-methylbenzaldehyde **3a**

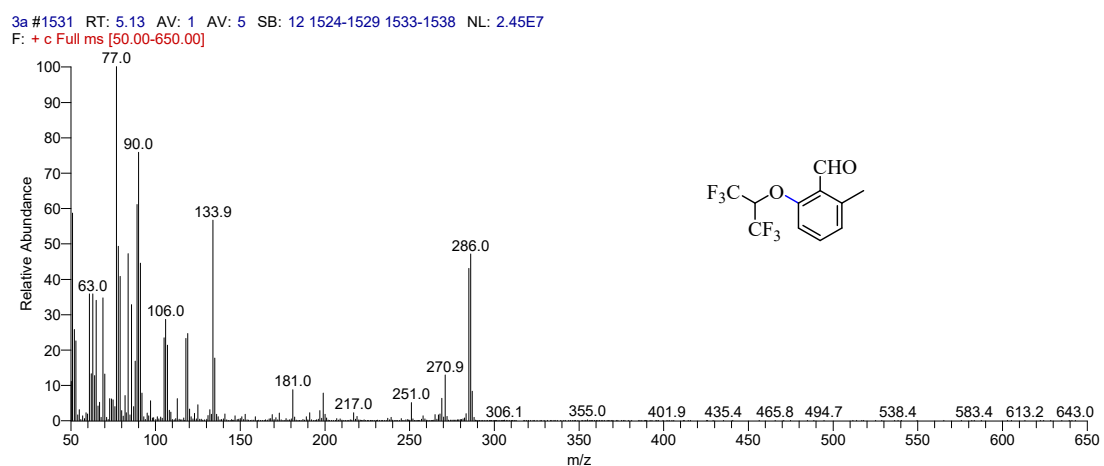

<sup>1</sup>H NMR of 6-((1,1,1,3,3,3-hexafluoropropan-2-yl)oxy)-2,3-dimethylbenzaldehyde **3b**

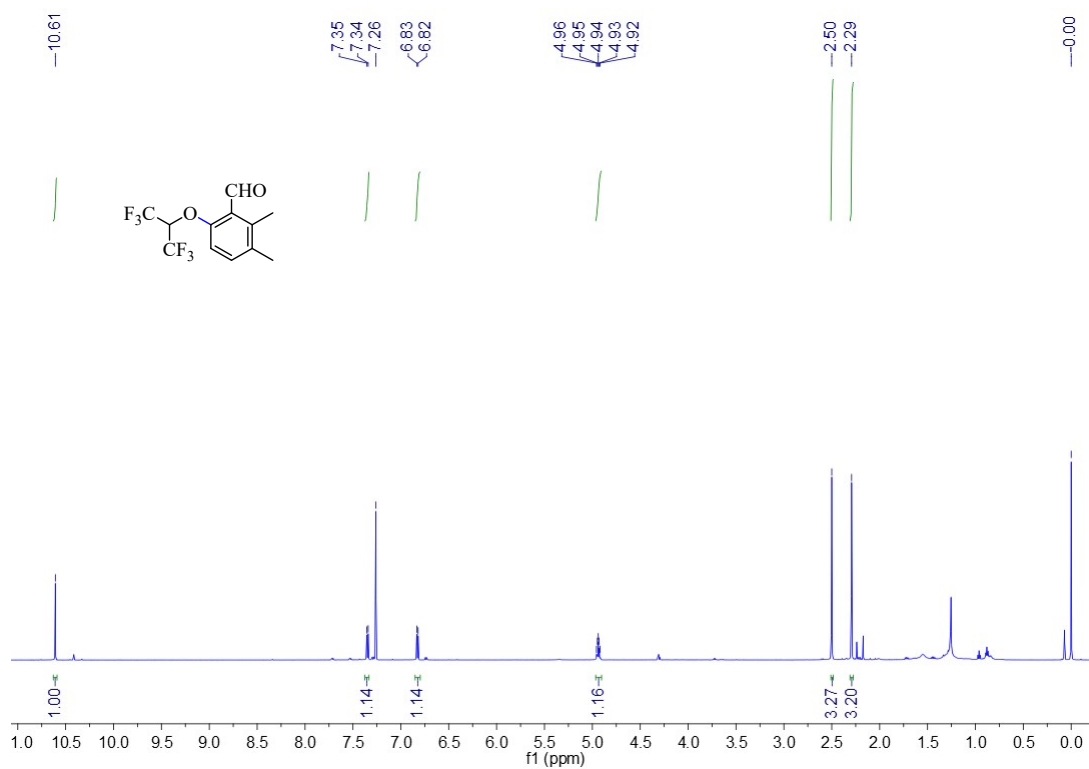

<sup>13</sup>C NMR of 6-((1,1,1,3,3,3-hexafluoropropan-2-yl)oxy)-2,3-dimethylbenzaldehyde **3b**

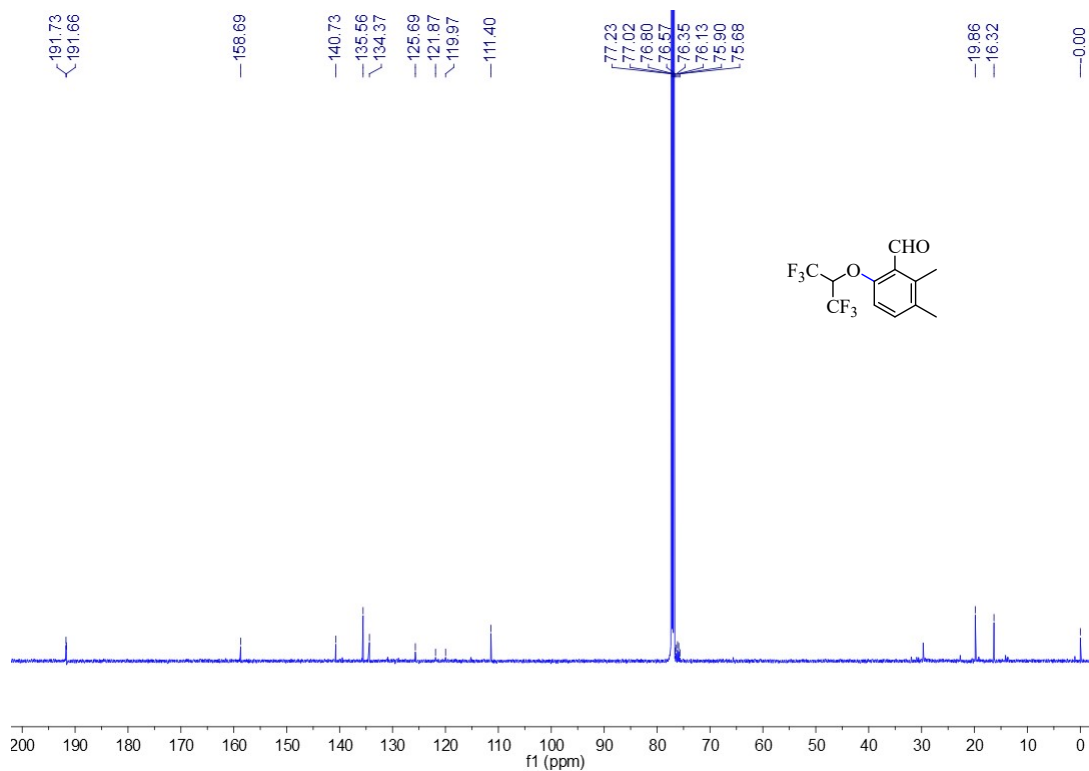

MS(EI) of 6-((1,1,1,3,3,3-hexafluoropropan-2-yl)oxy)-2,3-dimethylbenzaldehyde **3b**

3b #1704 RT: 5.70 AV: 1 AV: 5 SB: 12 1697-1702 1706-1711 NL: 1.60E5  
F: + c Full ms [50.00-650.00]

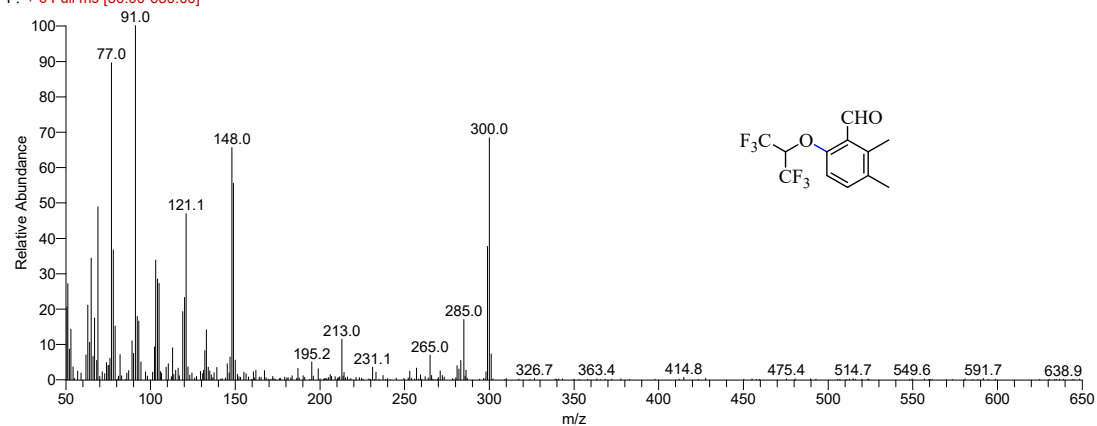

<sup>1</sup>H NMR of 2-((1,1,1,3,3,3-hexafluoropropan-2-yl)oxy)-4,6-dimethylbenzaldehyde **3c**

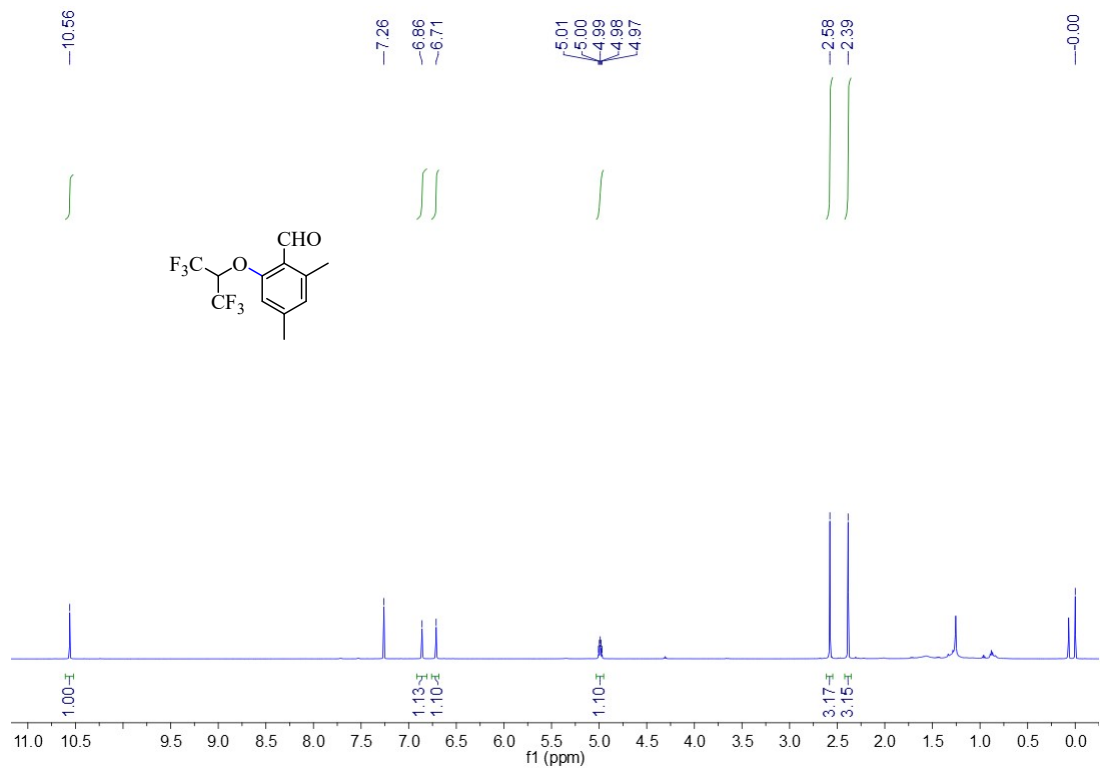

<sup>13</sup>C NMR of 2-((1,1,1,3,3,3-hexafluoropropan-2-yl)oxy)-4,6-dimethylbenzaldehyde **3c**

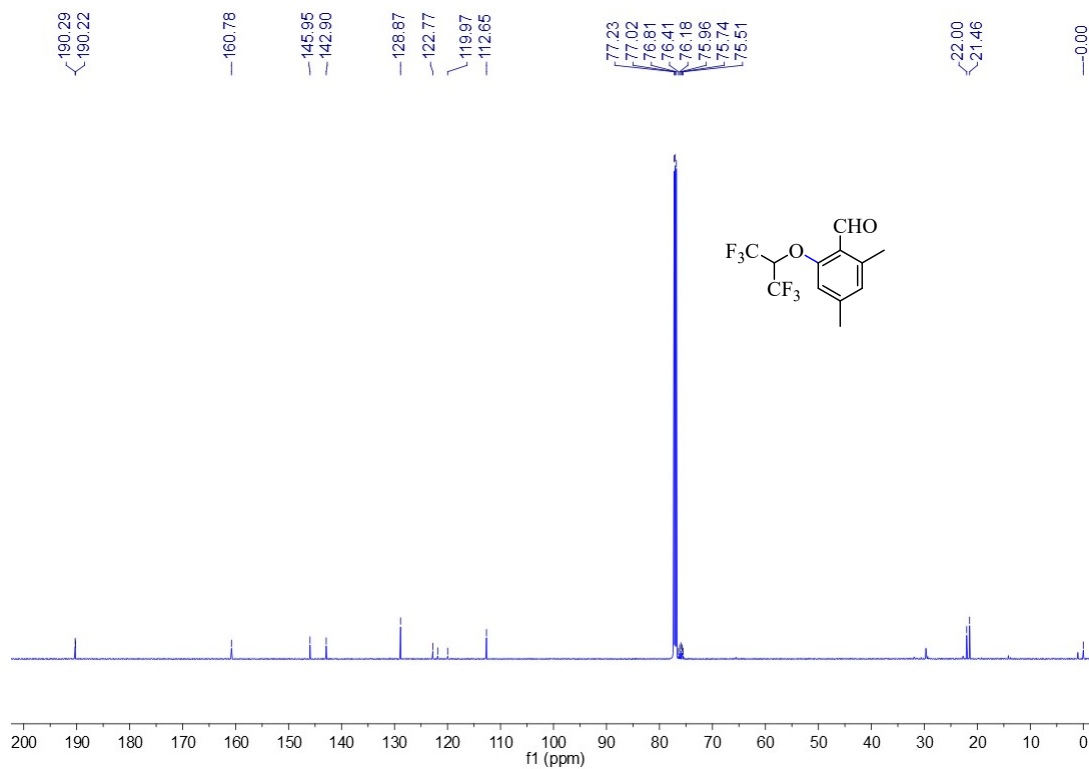

MS(EI) of 2-((1,1,1,3,3,3-hexafluoropropan-2-yl)oxy)-4,6-dimethylbenzaldehyde **3c**

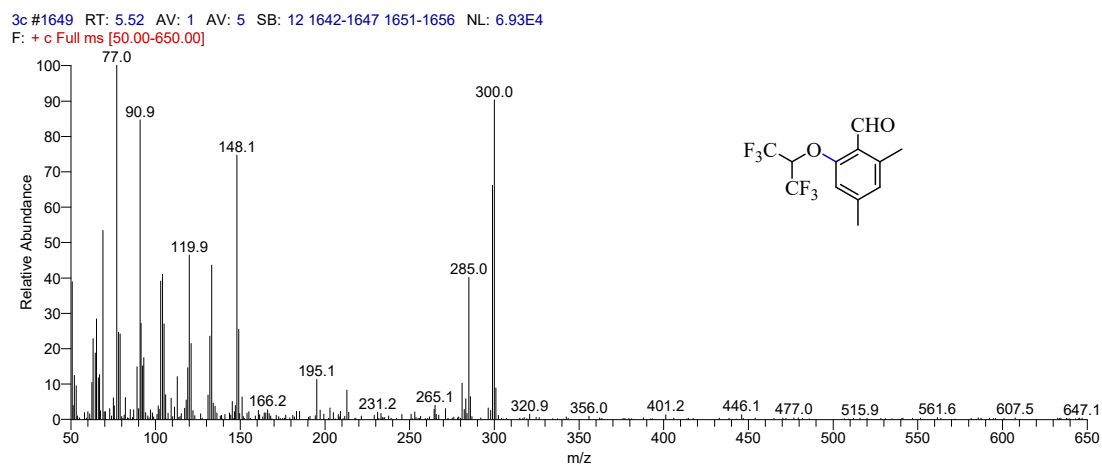

<sup>1</sup>H NMR of 2-((1,1,1,3,3,3-hexafluoropropan-2-yl)oxy)-4-methoxy-6-methylbenzaldehyde **3g**

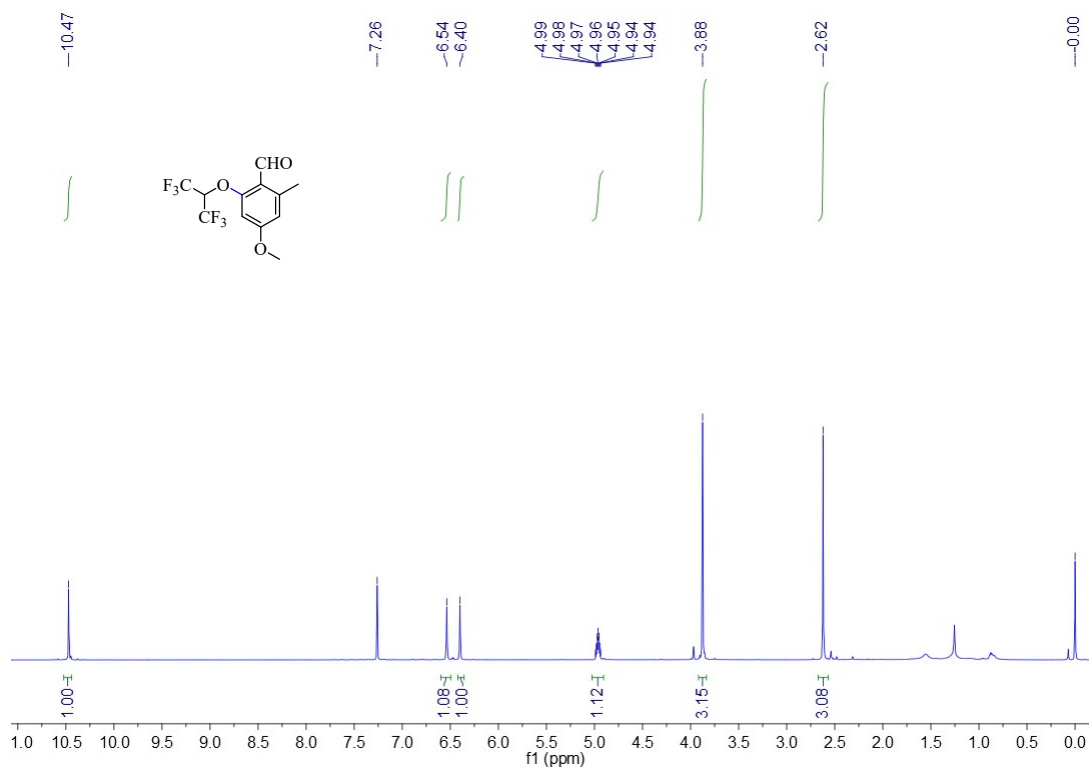

<sup>13</sup>C NMR of 2-((1,1,1,3,3,3-hexafluoropropan-2-yl)oxy)-4-methoxy-6-methylbenzaldehyde **3g**

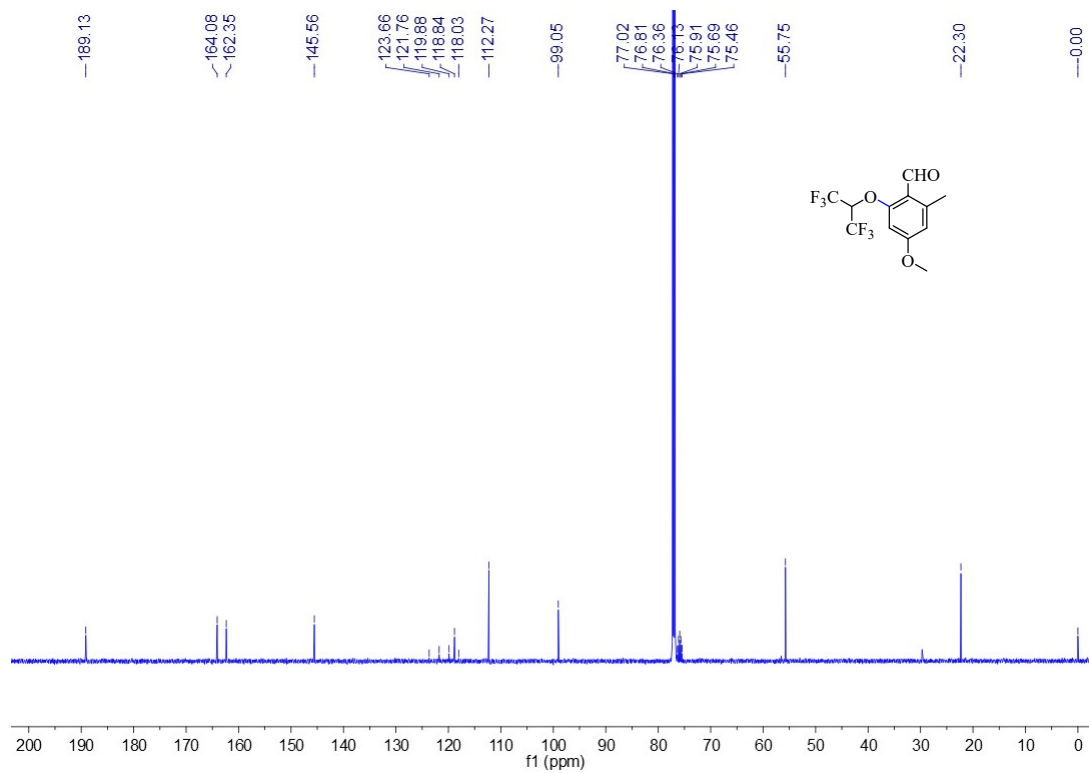

MS(EI) of 2-((1,1,1,3,3,3-hexafluoropropan-2-yl)oxy)-4-methoxy-6-methylbenzaldehyde **3g**

3d #1853 RT: 6.19 AV: 1 AV: 5 SB: 12 1846-1851 1855-1860 NL: 3.05E5  
 F: + c Full ms [50.00-650.00]

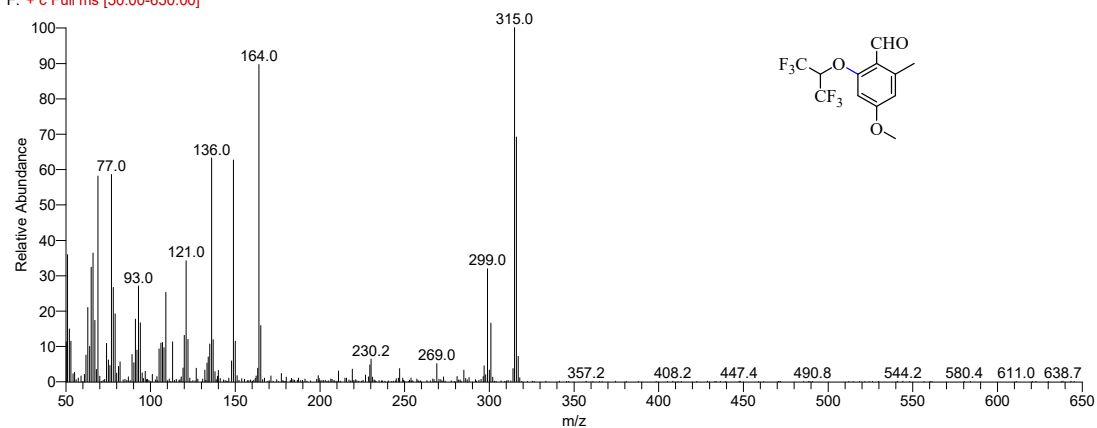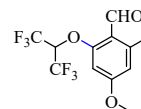

<sup>1</sup>H NMR of 4-fluoro-2-((1,1,1,3,3,3-hexafluoropropan-2-yl)oxy)-6-methylbenzaldehyde **3i**

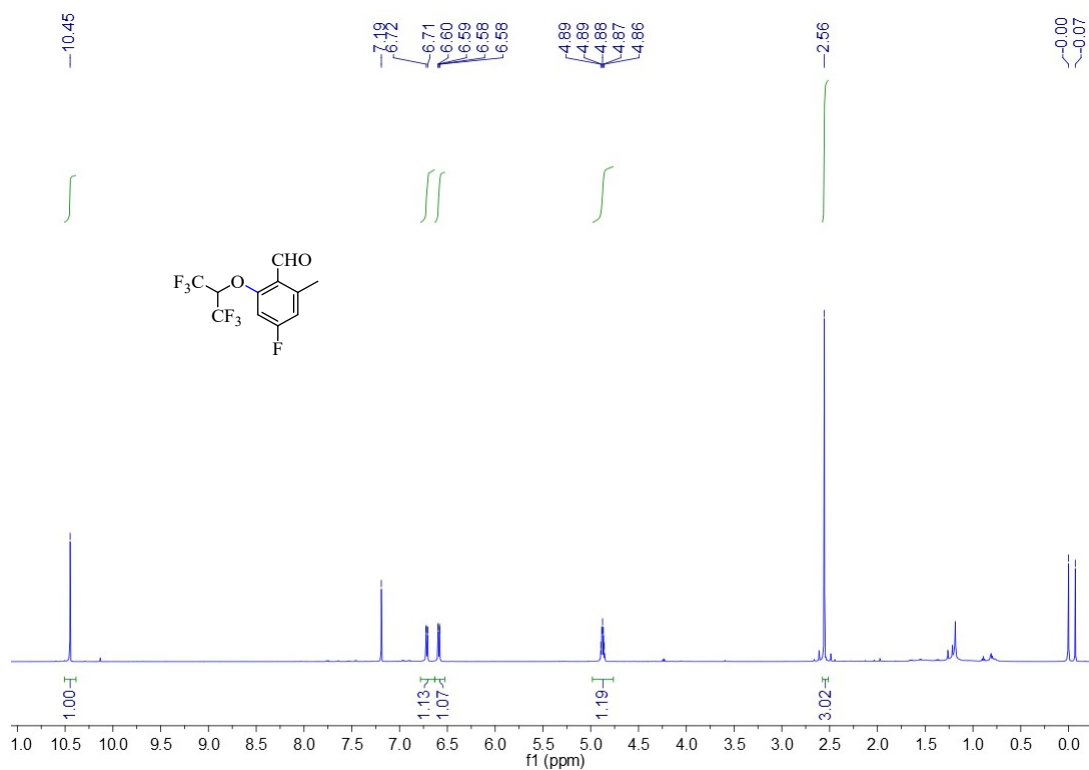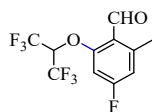

<sup>13</sup>C NMR of 4-fluoro-2-((1,1,1,3,3,3-hexafluoropropan-2-yl)oxy)-6-methylbenzaldehyde **3i**

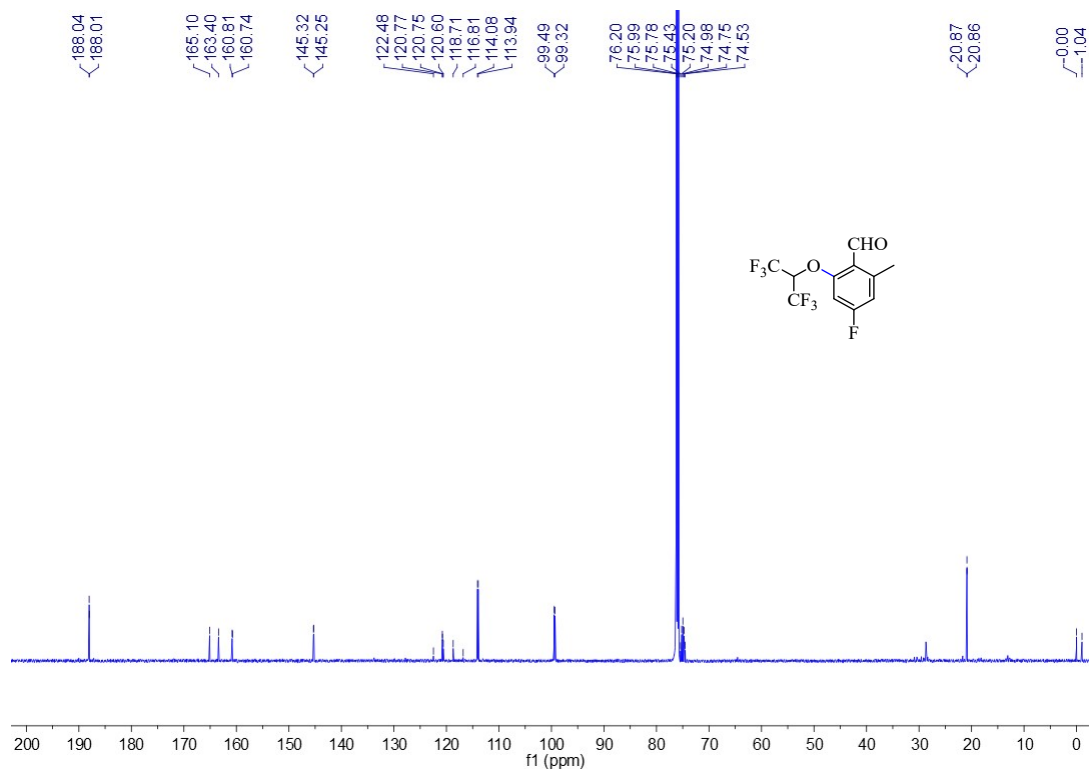

MS(EI) of 4-fluoro-2-((1,1,1,3,3,3-hexafluoropropan-2-yl)oxy)-6-methylbenzaldehyde **3i**

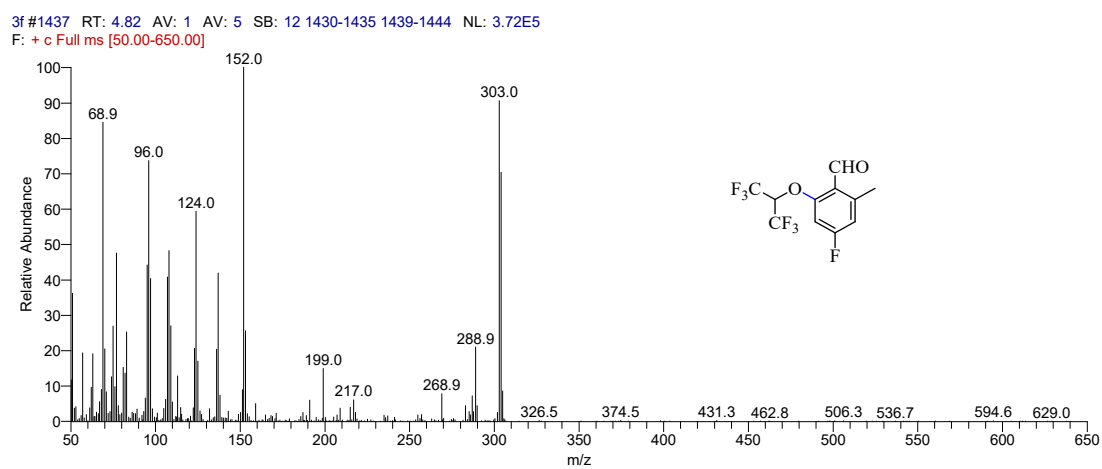

<sup>1</sup>H NMR of 4-chloro-2-((1,1,1,3,3,3-hexafluoropropan-2-yl)oxy)-6-methylbenzaldehyde **3k**

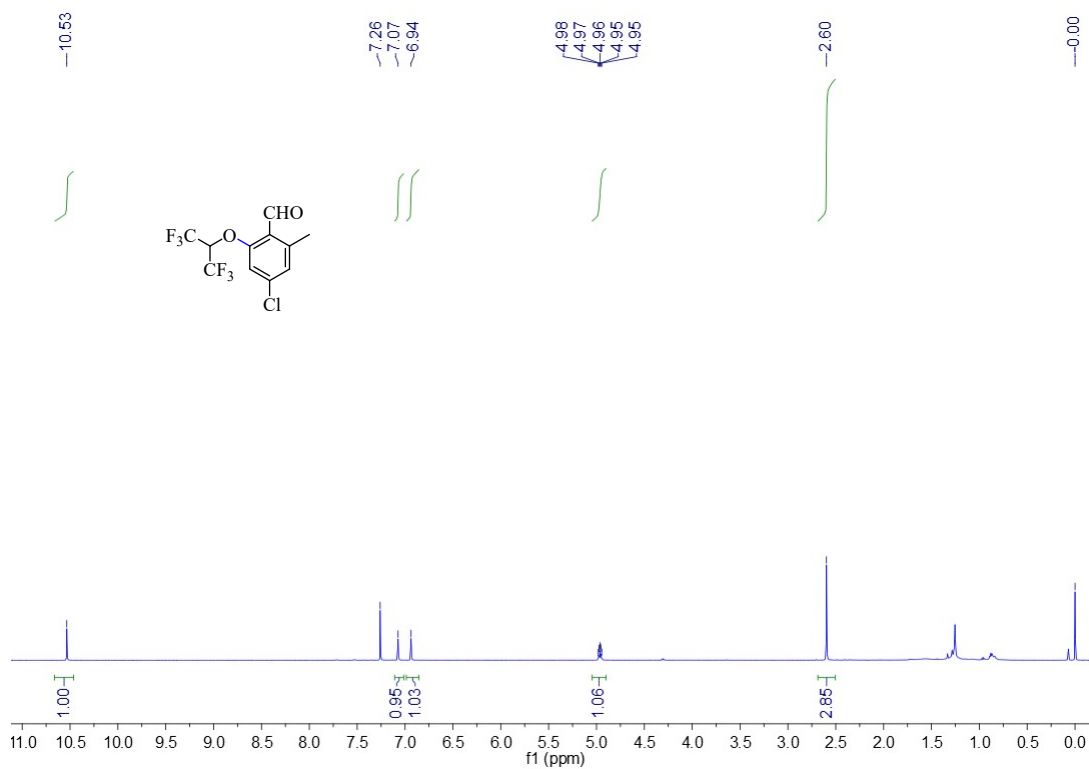

<sup>13</sup>C NMR of 4-chloro-2-((1,1,1,3,3,3-hexafluoropropan-2-yl)oxy)-6-methylbenzaldehyde **3k**

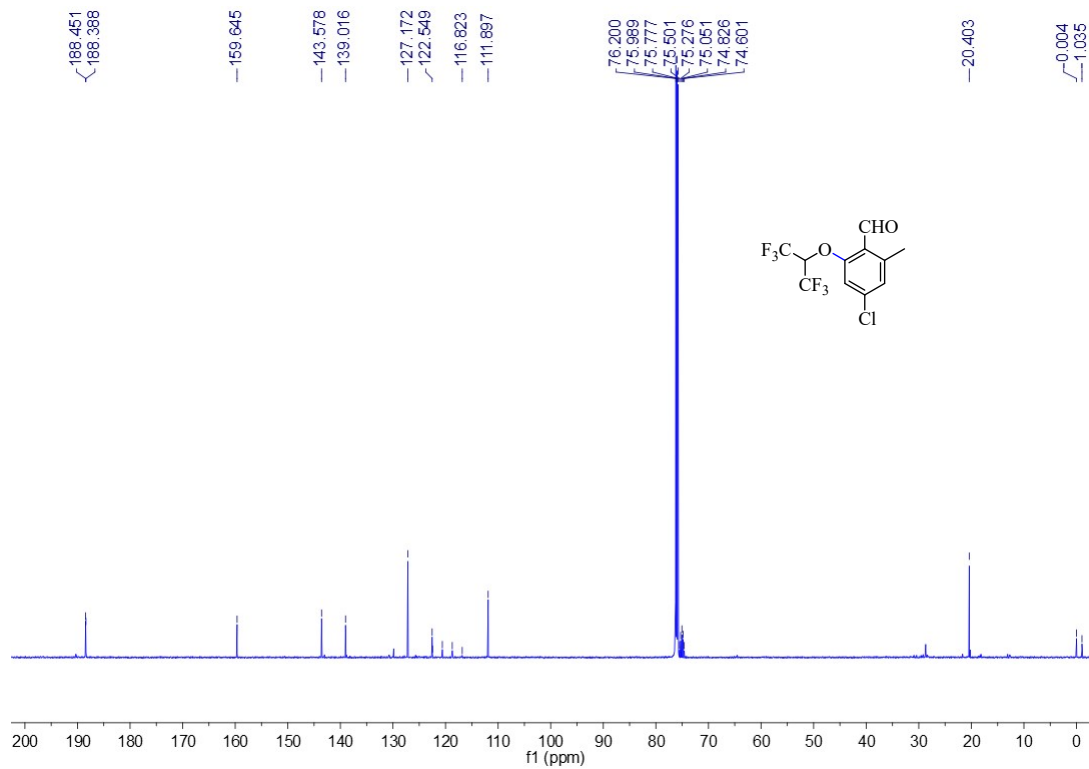



MS(EI) of 4-chloro-2-((1,1,1,3,3,3-hexafluoropropan-2-yl)oxy)-6-methylbenzaldehyde **3k**

3g #1679 RT: 5.62 AV: 1 AV: 5 SB: 12 1672-1677 1681-1686 NL: 5.22E5  
F: + c Full ms [50.00-650.00]

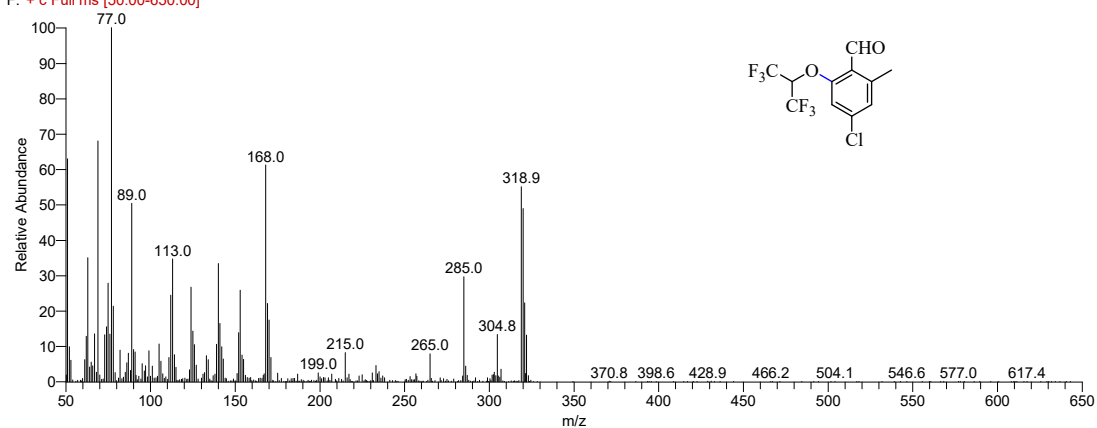

<sup>1</sup>H NMR of 4-bromo-2-((1,1,1,3,3,3-hexafluoropropan-2-yl)oxy)-6-methylbenzaldehyde **3m**

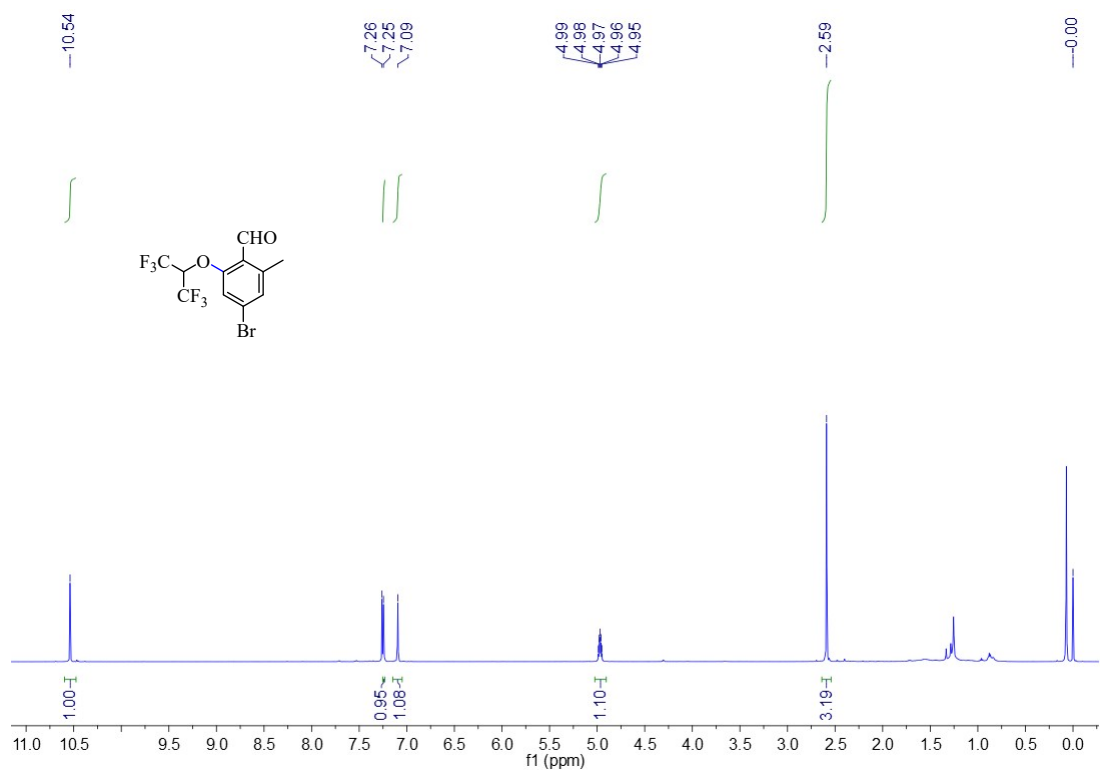

<sup>13</sup>C NMR of 4-bromo-2-((1,1,1,3,3,3-hexafluoropropan-2-yl)oxy)-6-methylbenzaldehyde **3m**

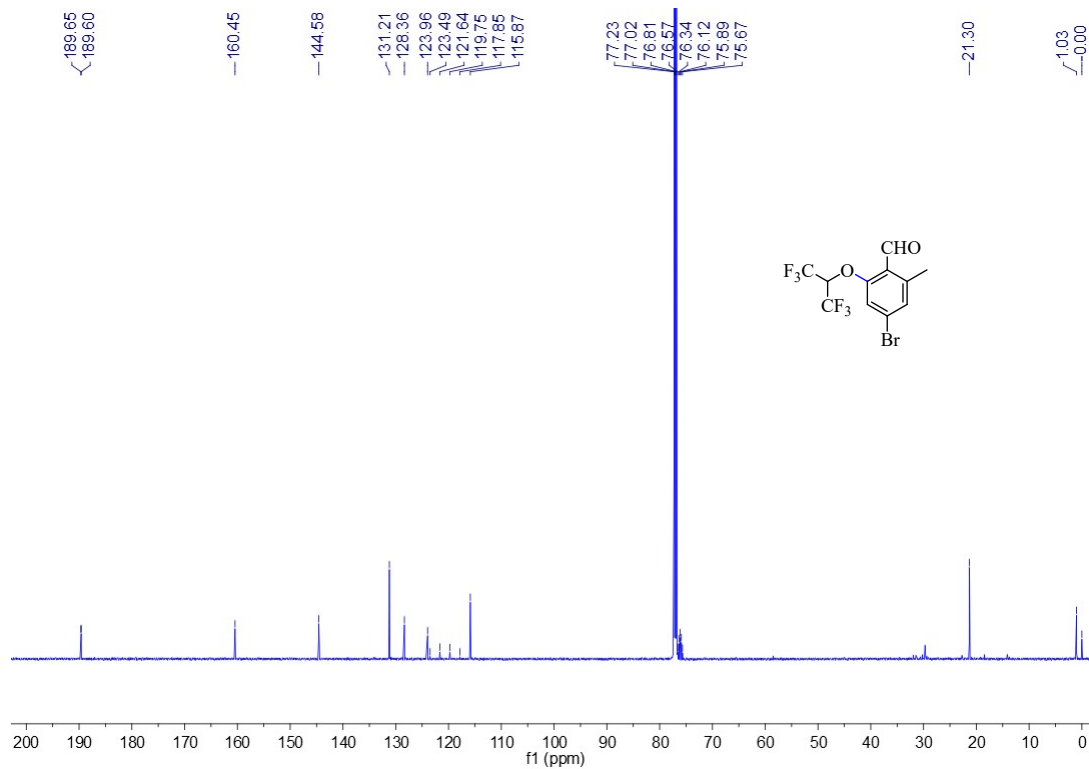

MS(EI) of 4-bromo-2-((1,1,1,3,3,3-hexafluoropropan-2-yl)oxy)-6-methylbenzaldehyde **3m**

3h #1801 RT: 6.02 AV: 1 AV: 5 SB: 12 1794-1799 1803-1808 NL: 3.82E5  
F: + c Full ms [50.00-650.00]

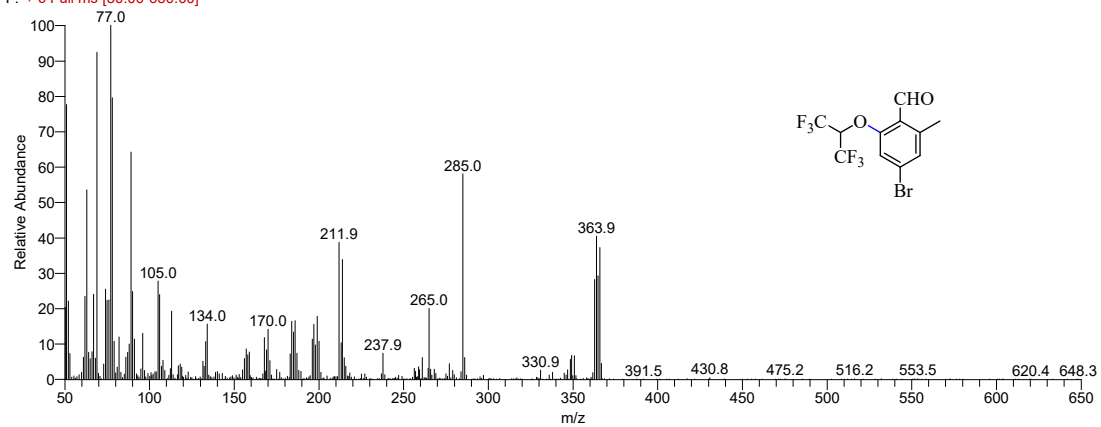

<sup>1</sup>H NMR of 6-((1,1,1,3,3,3-hexafluoropropan-2-yl)oxy)-4-methoxy-2,3-dimethylbenzaldehyde **3p**

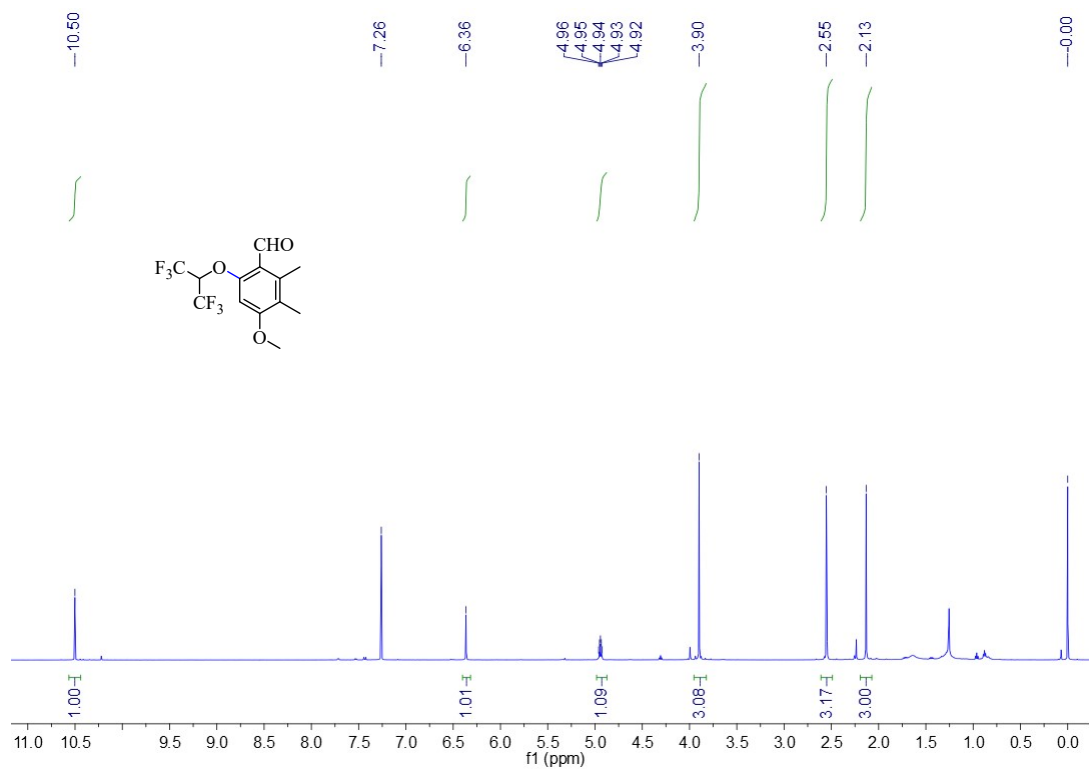

<sup>13</sup>C NMR of 6-((1,1,1,3,3,3-hexafluoropropan-2-yl)oxy)-4-methoxy-2,3-dimethylbenzaldehyde **3p**

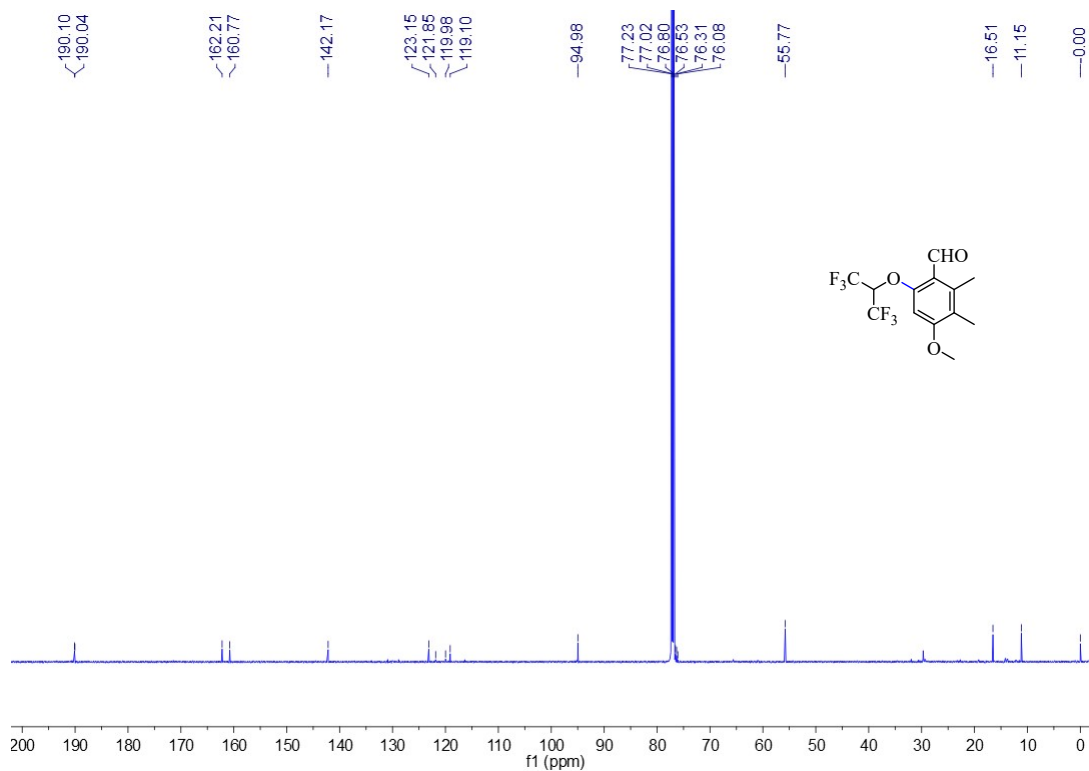

MS(EI) of 6-((1,1,1,3,3,3-hexafluoropropan-2-yl)oxy)-4-methoxy-2,3-dimethylbenzaldehyde **3p**

3e #1988 RT: 6.64 AV: 1 AV: 5 SB: 12 1981-1986 1990-1995 NL: 5.52E4  
 F: + c Full ms [50.00-650.00]

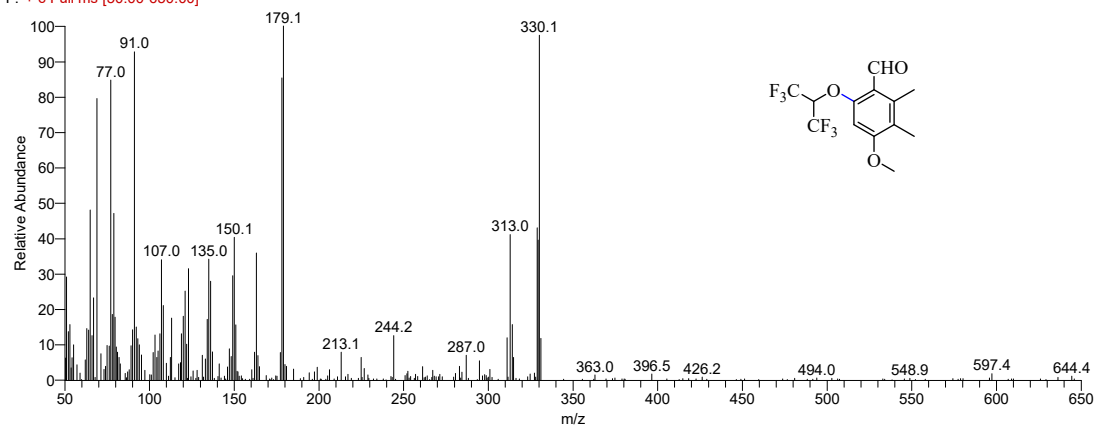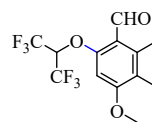

<sup>1</sup>H NMR of 2-((1,1,1,3,3,3-hexafluoropropan-2-yl)oxy)benzaldehyde **3r**

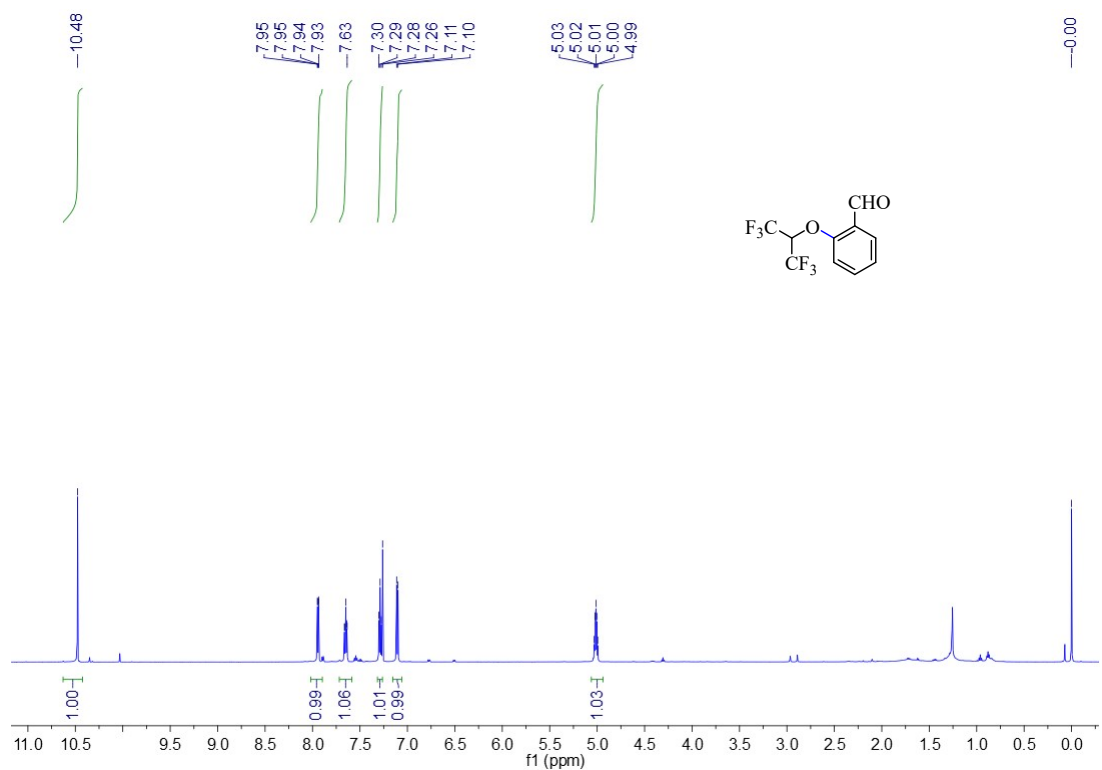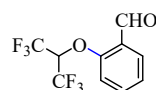

<sup>13</sup>C NMR of 2-((1,1,1,3,3,3-hexafluoropropan-2-yl)oxy)benzaldehyde **3r**

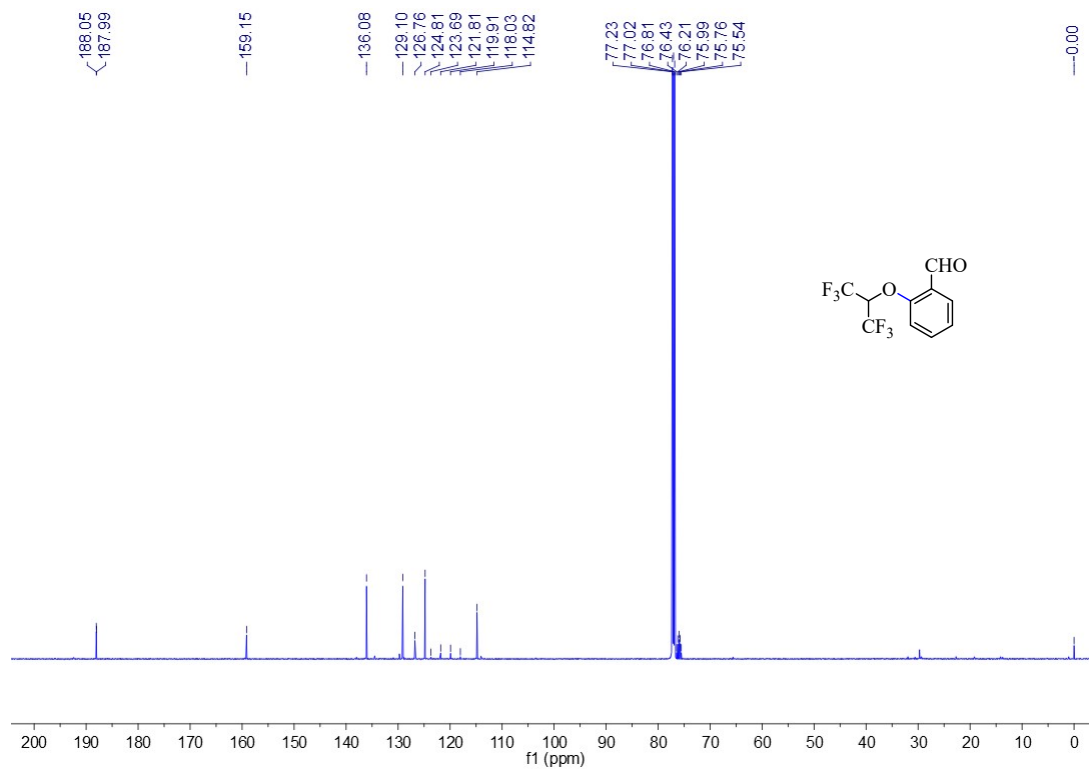

<sup>1</sup>H NMR of 2-((1,1,1,3,3,3-hexafluoropropan-2-yl)oxy)-4-methylbenzaldehyde **3s**

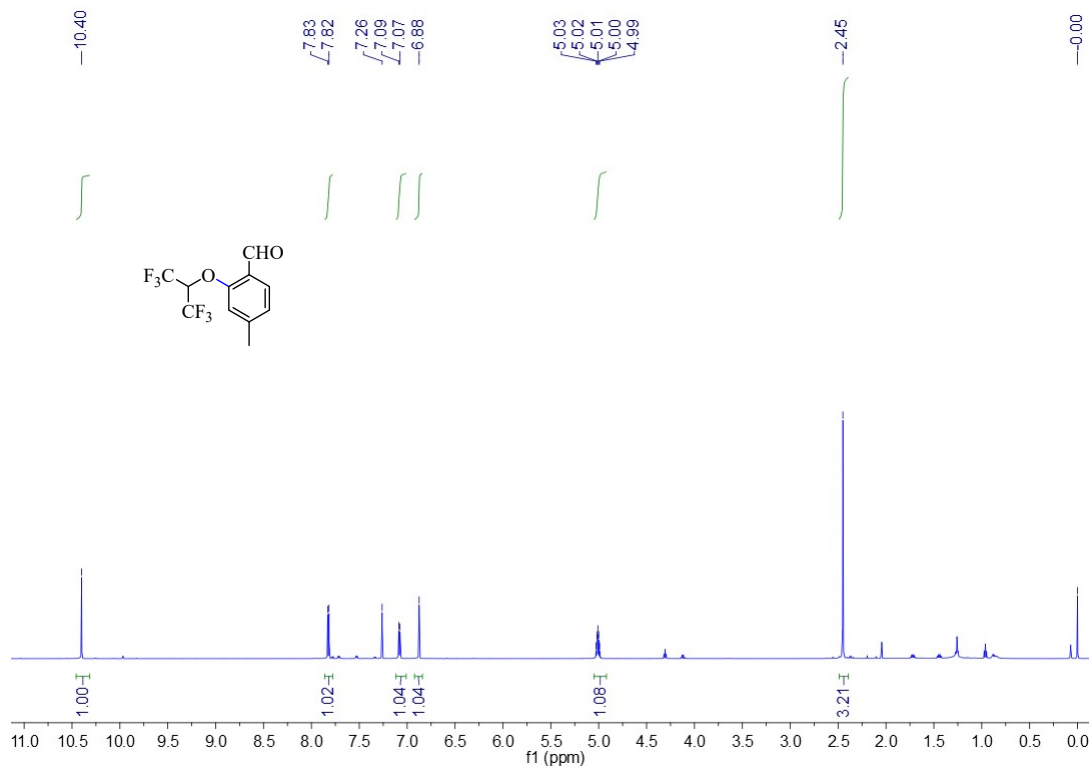

<sup>13</sup>C NMR of 2-((1,1,1,3,3,3-hexafluoropropan-2-yl)oxy)-4-methylbenzaldehyde **3s**

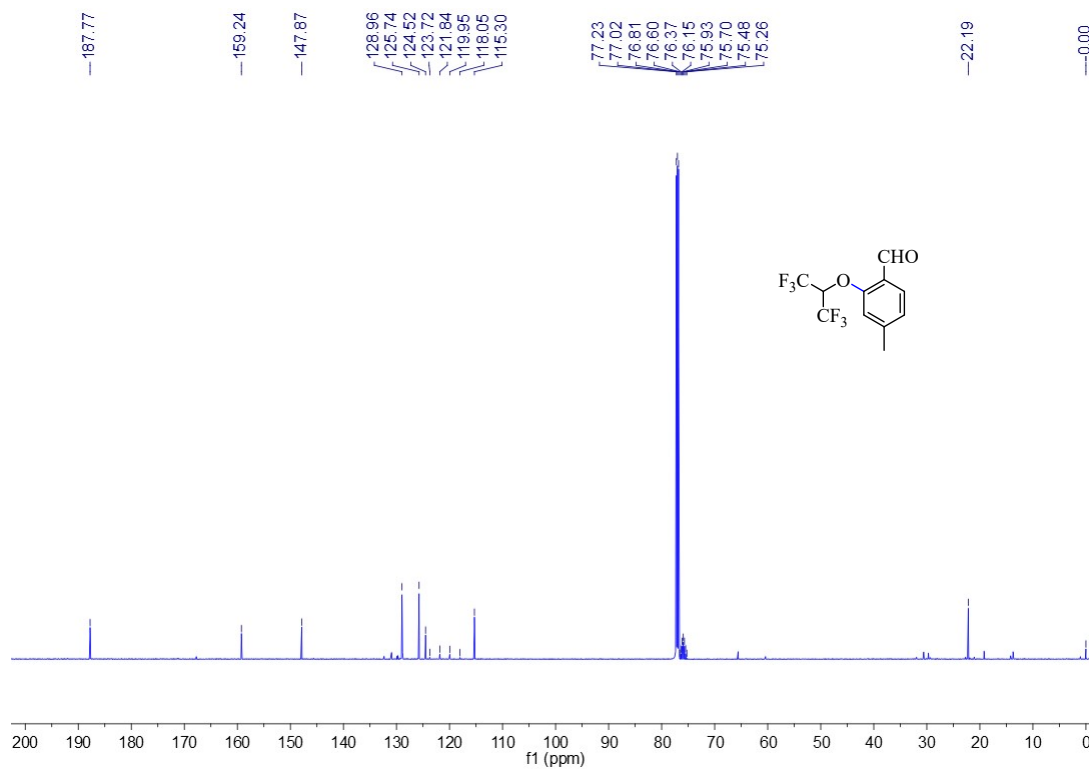

MS(EI) of 2-((1,1,1,3,3,3-hexafluoropropan-2-yl)oxy)-4-methylbenzaldehyde **3s**

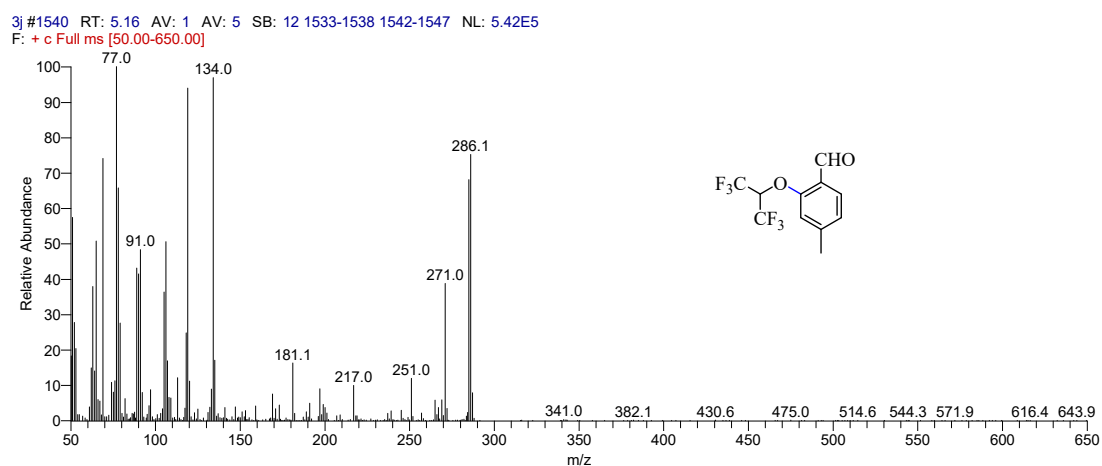

<sup>1</sup>H NMR of 2-ethyl-6-((1,1,1,3,3,3-hexafluoropropan-2-yl)oxy)benzaldehyde **3t**

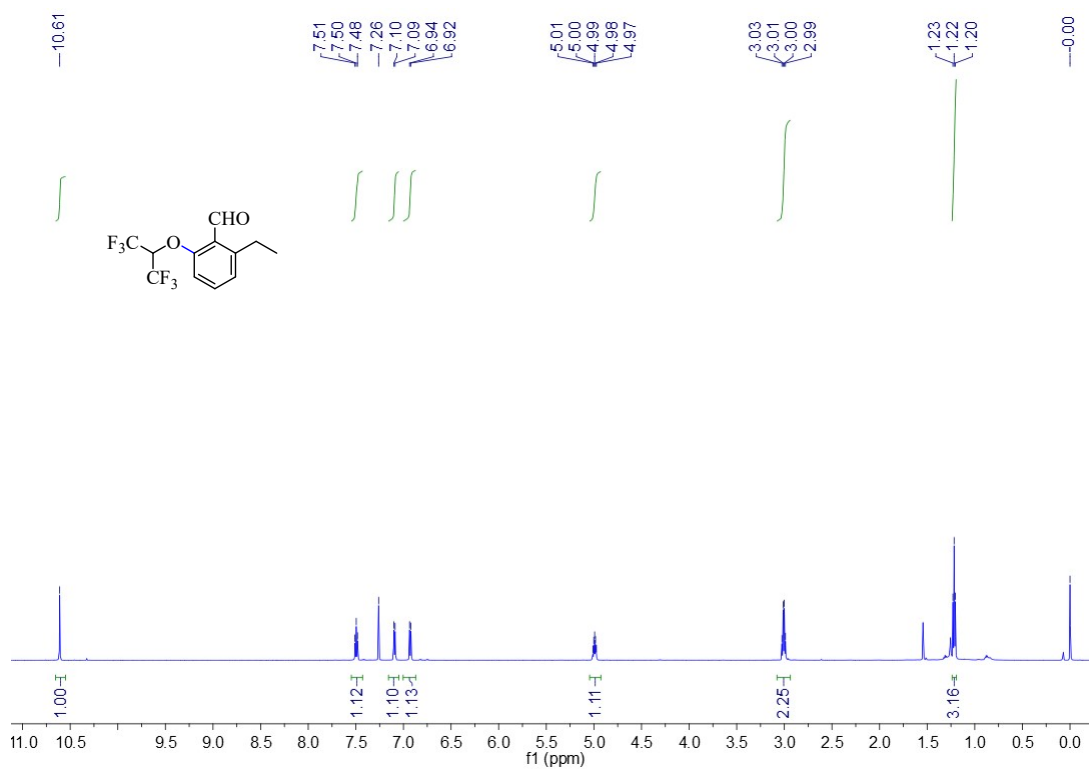

<sup>13</sup>C NMR of 2-ethyl-6-((1,1,1,3,3,3-hexafluoropropan-2-yl)oxy)benzaldehyde **3t**

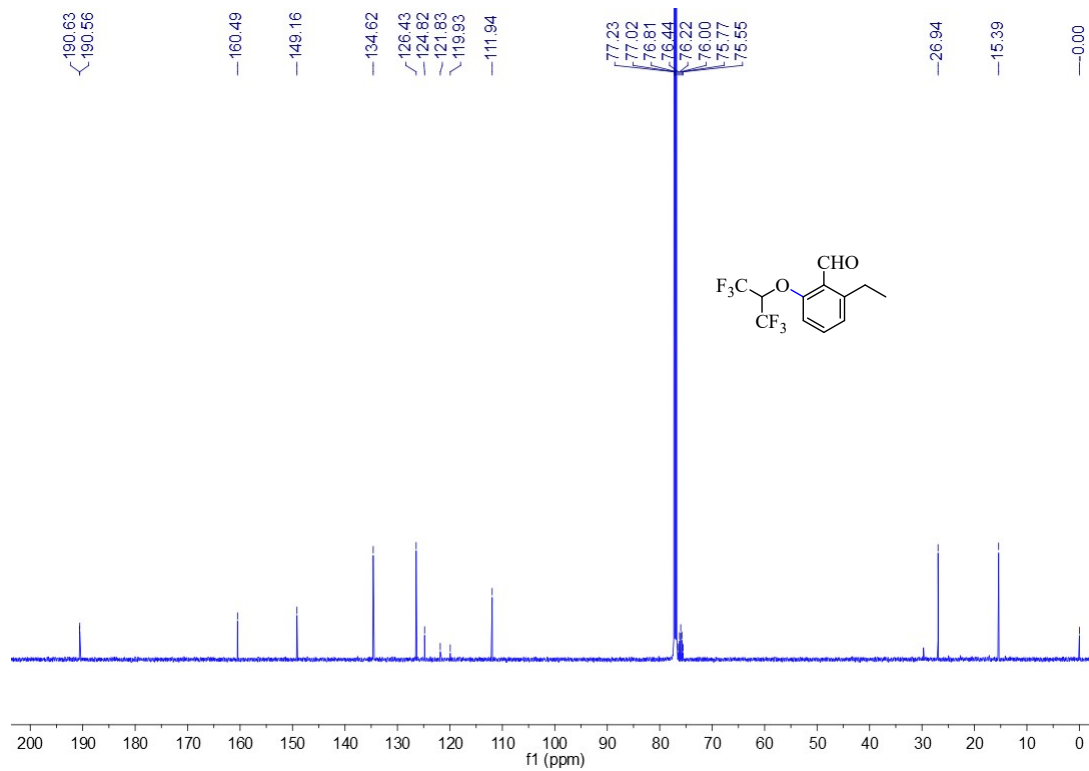

MS(EI) of 2-ethyl-6-((1,1,1,3,3,3-hexafluoropropan-2-yl)oxy)benzaldehyde **3t**

3k #1603 RT: 5.37 AV: 1 AV: 5 SB: 12 1596-1601 1605-1610 NL: 2.32E5  
 F: + c Full ms [50.00-650.00]

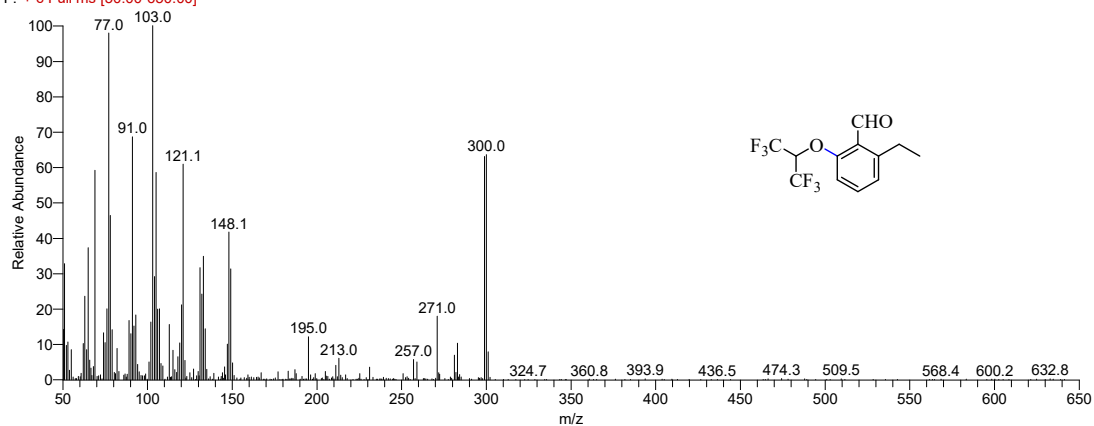

<sup>1</sup>H NMR of 2-chloro-6-((1,1,1,3,3,3-hexafluoropropan-2-yl)oxy)benzaldehyde **3u**

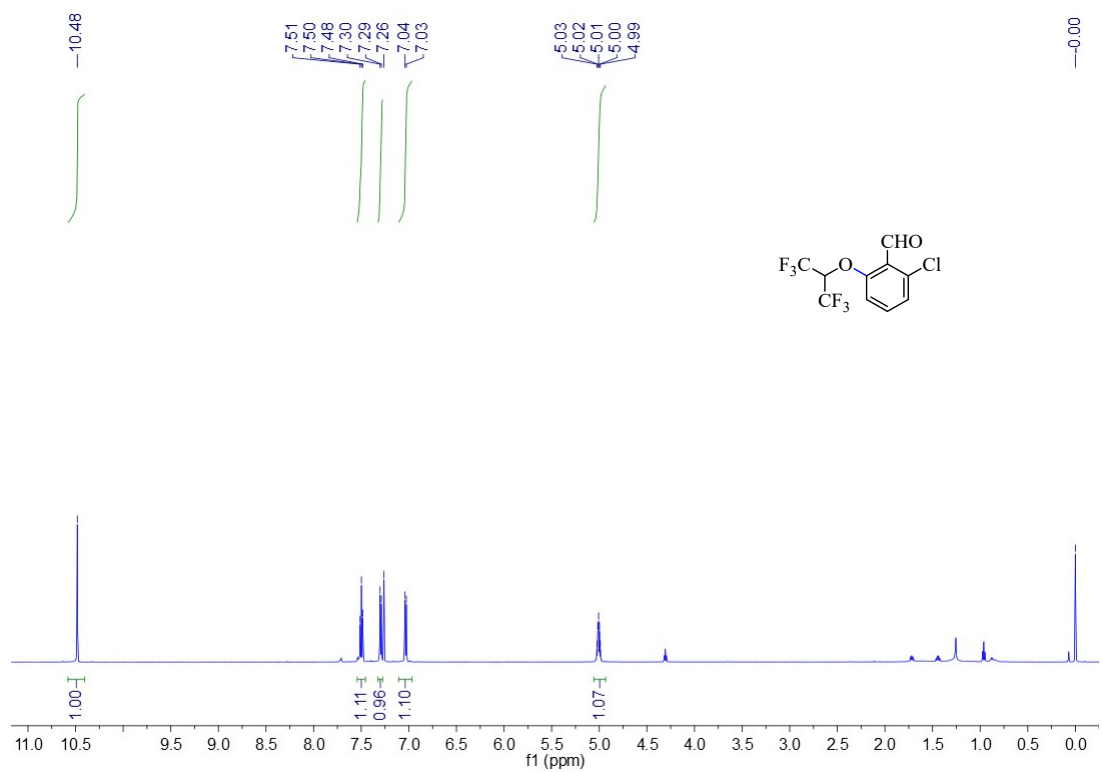



<sup>13</sup>C NMR of 2-chloro-6-((1,1,1,3,3,3-hexafluoropropan-2-yl)oxy)benzaldehyde **3u**

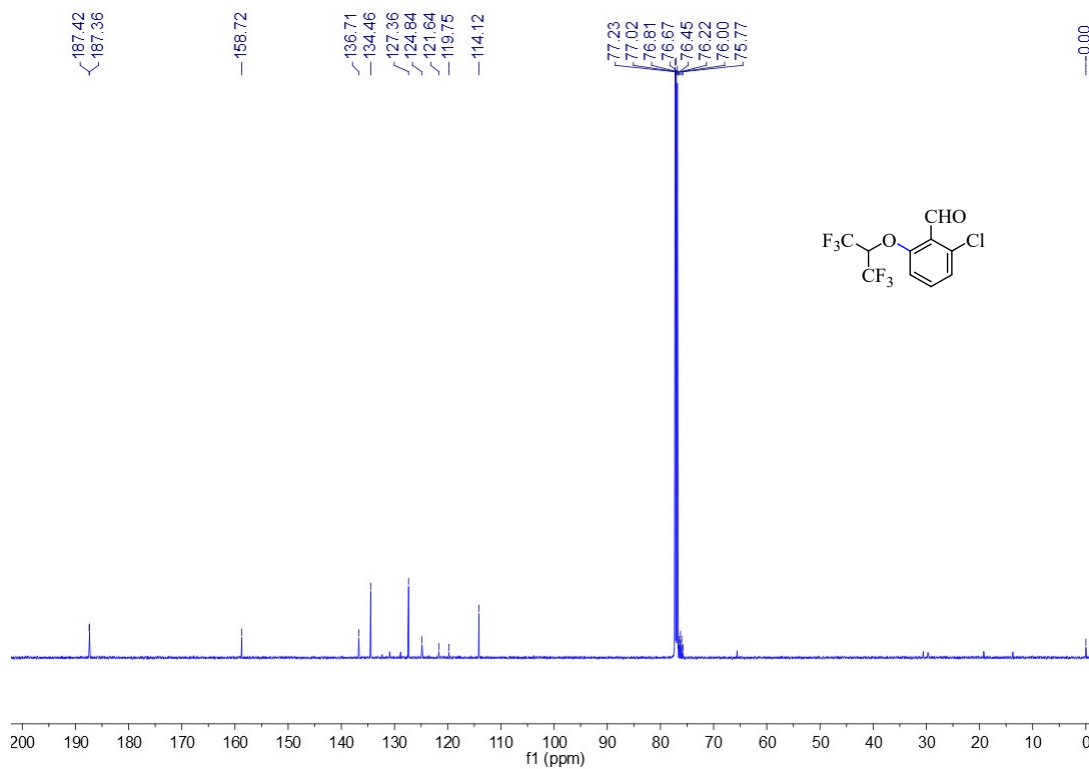

<sup>1</sup>H NMR of 2-bromo-6-((1,1,1,3,3,3-hexafluoropropan-2-yl)oxy)benzaldehyde **3v**

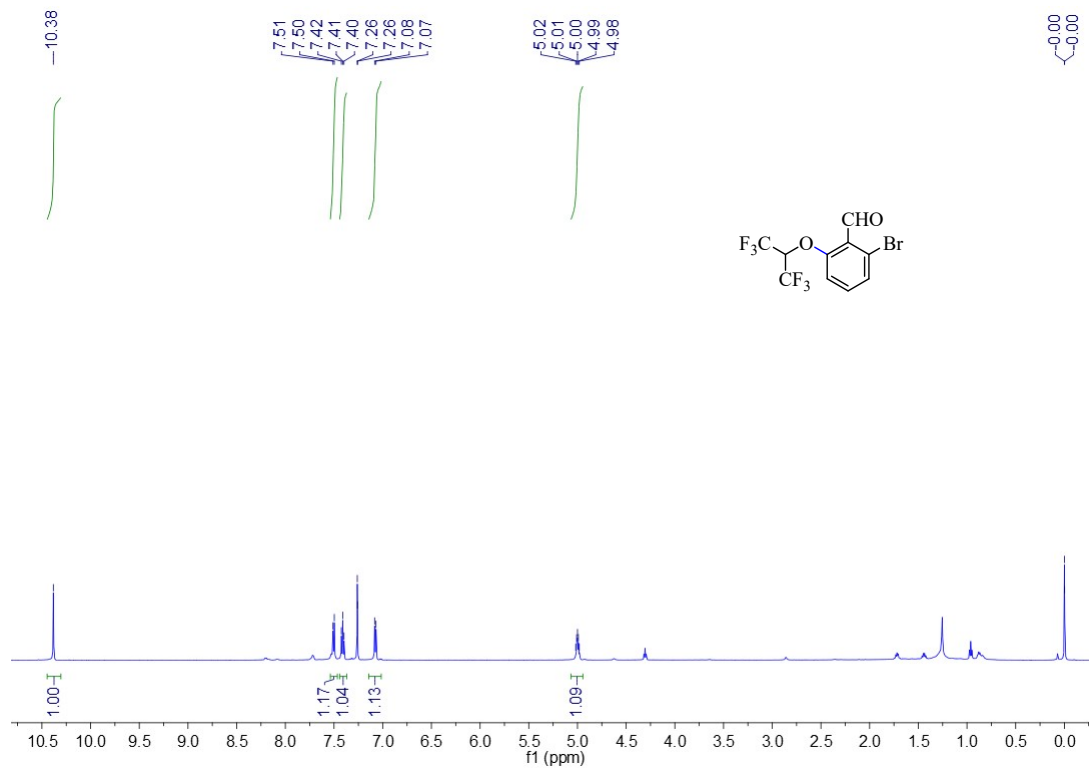

<sup>13</sup>C NMR of 2-bromo-6-((1,1,1,3,3,3-hexafluoropropan-2-yl)oxy)benzaldehyde **3v**

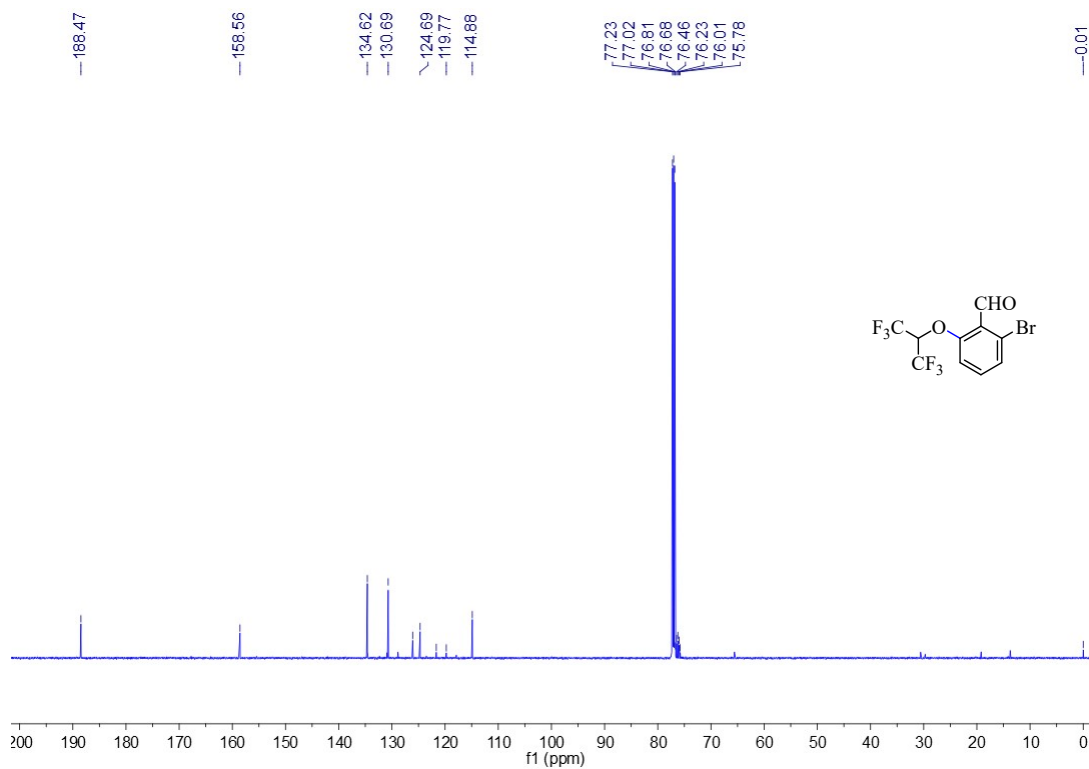

<sup>1</sup>H NMR of 4-bromo-2-((1,1,1,3,3,3-hexafluoropropan-2-yl)oxy)benzaldehyde **3w**

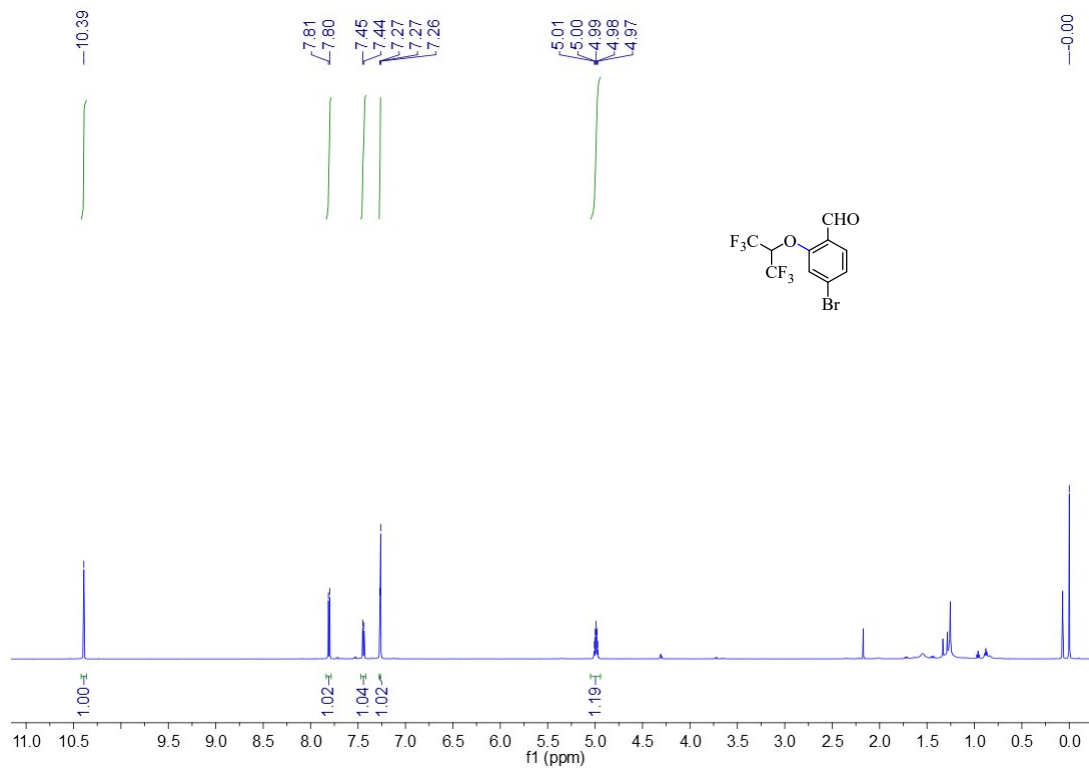

<sup>13</sup>C NMR of 4-bromo-2-((1,1,1,3,3,3-hexafluoropropan-2-yl)oxy)benzaldehyde **3w**

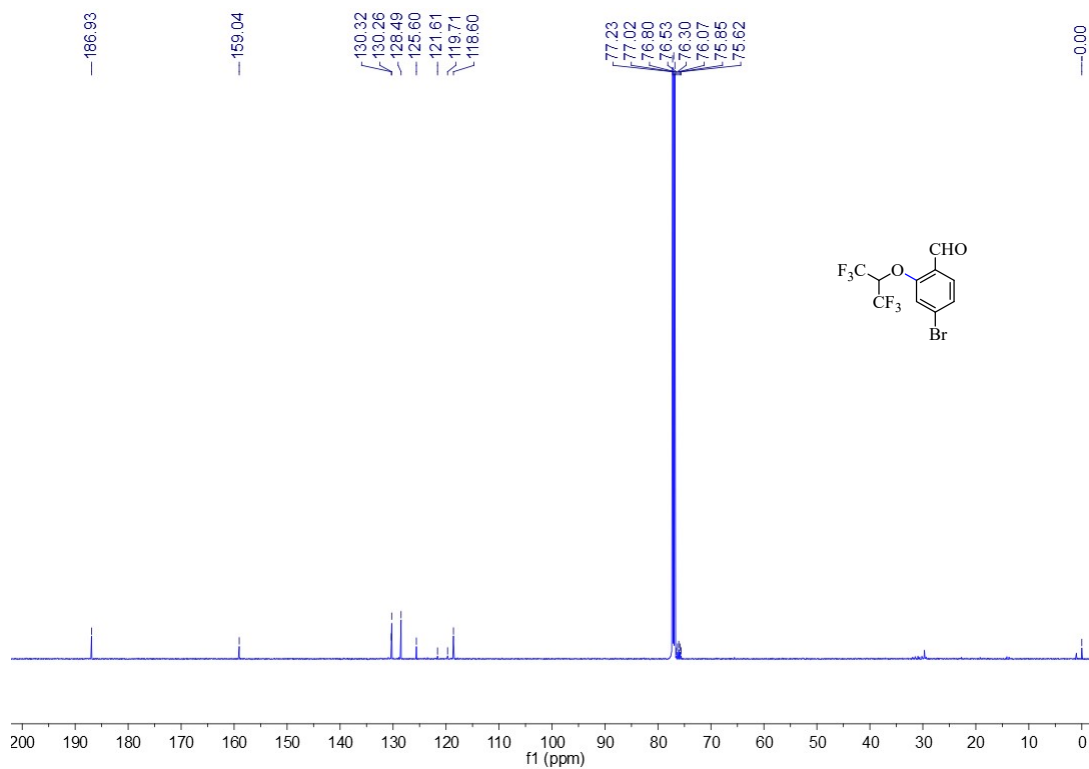

<sup>1</sup>H NMR of 2-methyl-6-(2,2,2-trifluoroethoxy)benzaldehyde **4**

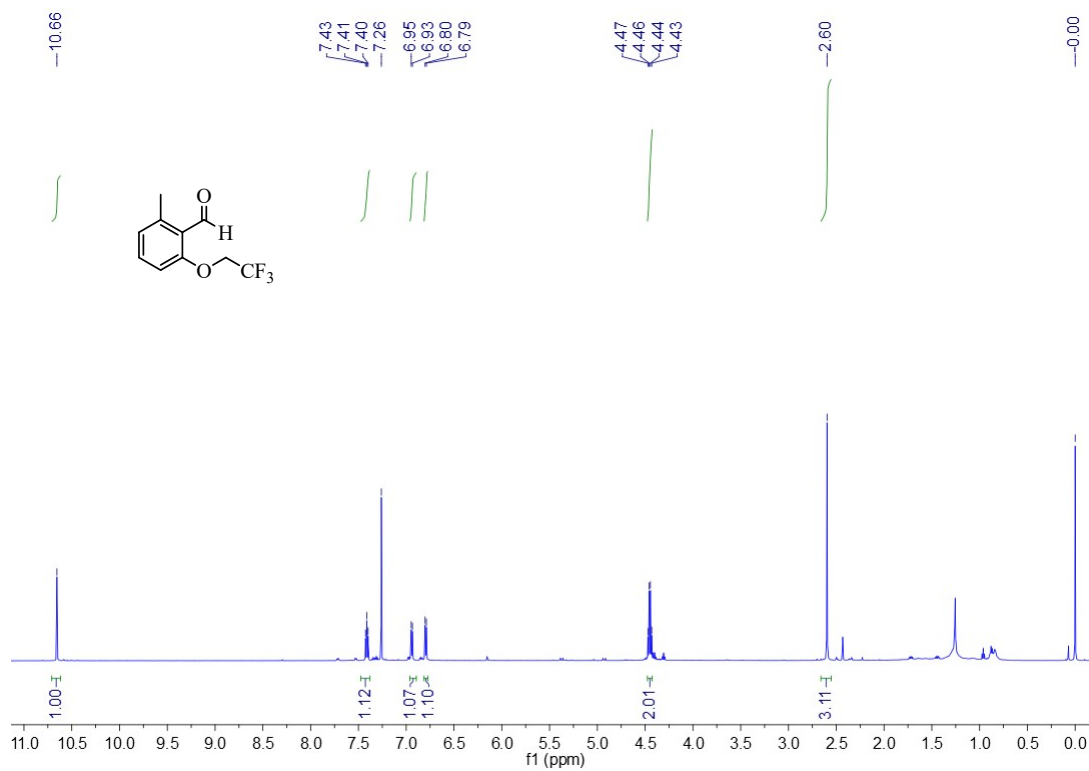

### <sup>13</sup>C NMR of 2-methyl-6-(2,2,2-trifluoroethoxy)benzaldehyde 4

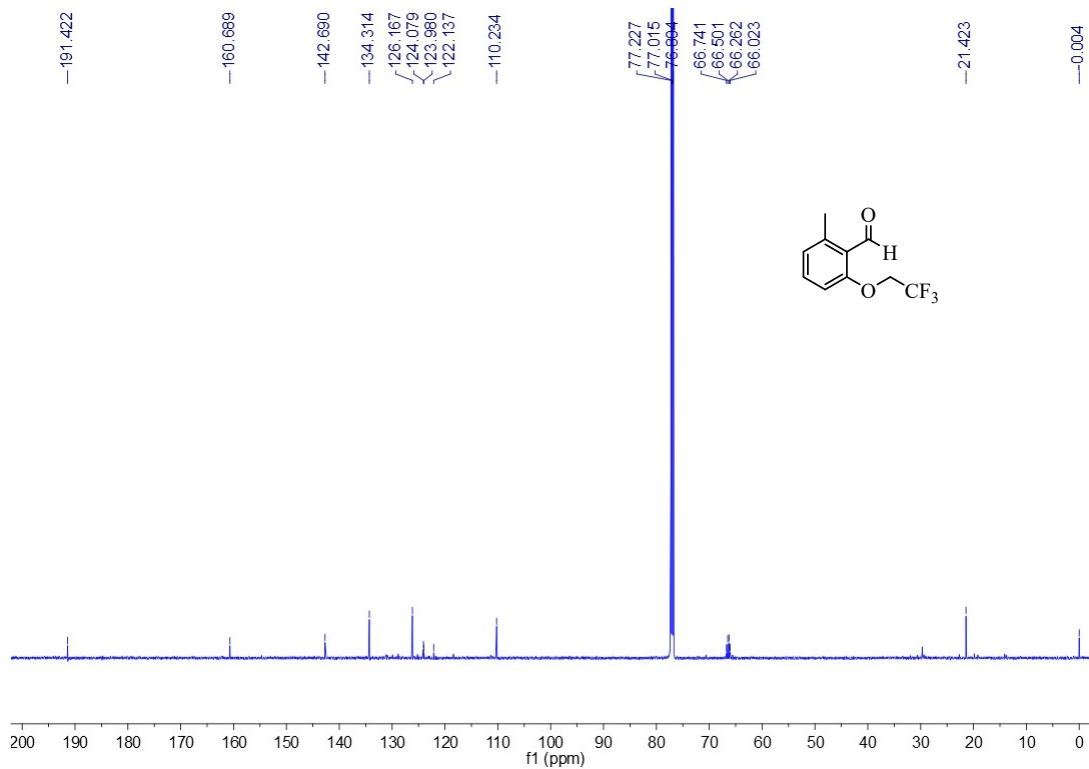

### MS(EI) of 2-methyl-6-(2,2,2-trifluoroethoxy)benzaldehyde 4

4a #1711 RT: 5.72 AV: 1 AV: 5 SB: 12 1704-1709 1713-1718 NL: 2.37E5  
F: + c Full ms [50.00-650.00]

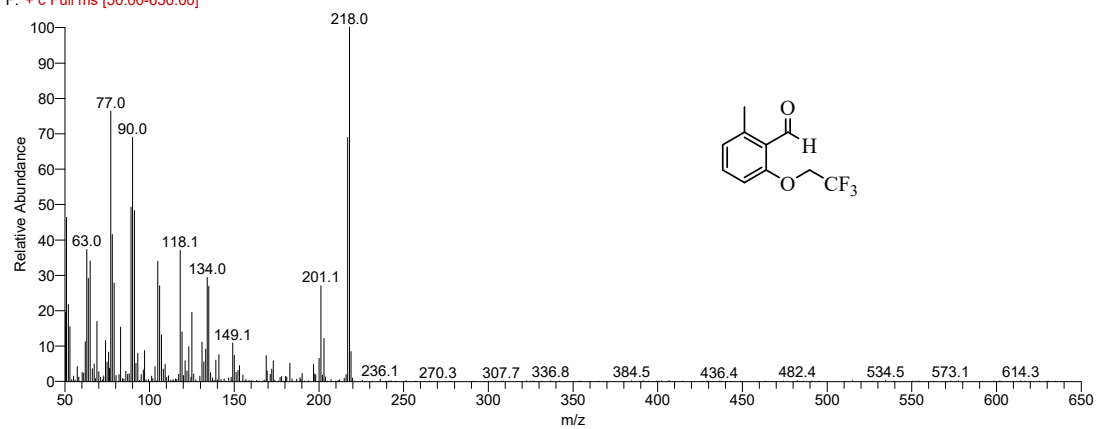

<sup>1</sup>H NMR of 2-((1,1,1,3,3,3-hexafluoropropan-2-yl)oxy)-6-(((1,1,1,3,3,3-hexafluoropropan-2-yl)oxy)methyl)benzaldehyde **5**

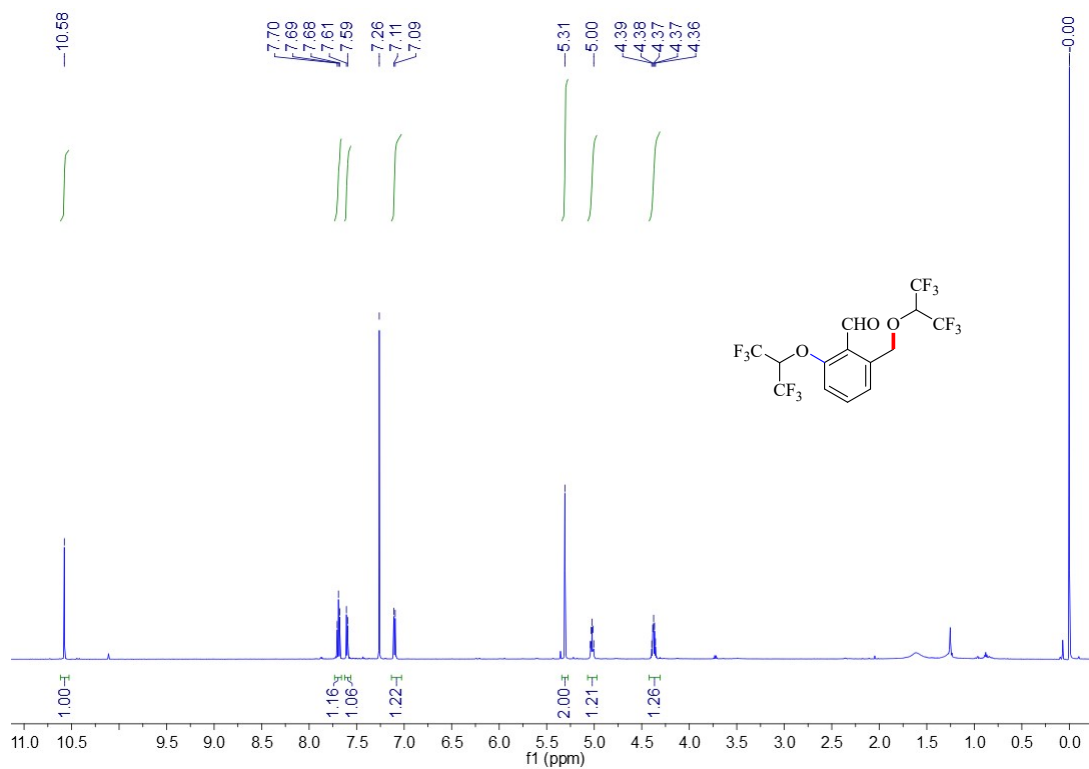

<sup>13</sup>C NMR of 2-((1,1,1,3,3,3-hexafluoropropan-2-yl)oxy)-6-(((1,1,1,3,3,3-hexafluoropropan-2-yl)oxy)methyl)benzaldehyde **5**

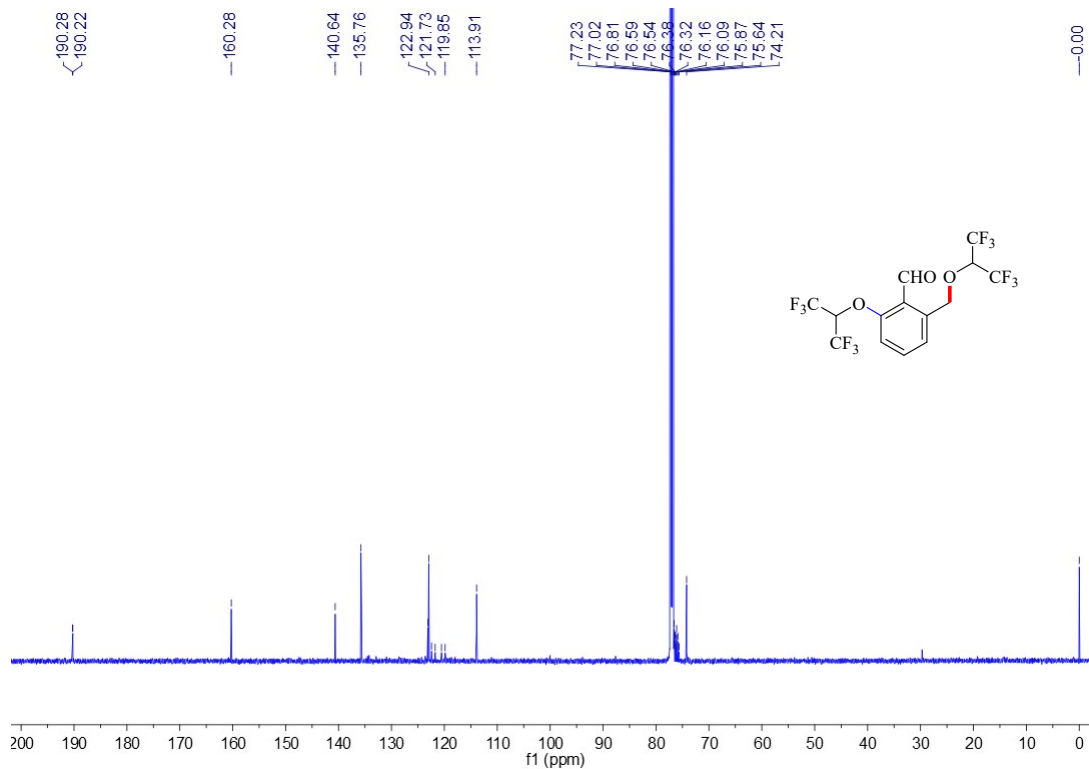

### <sup>1</sup>H NMR of Intermediate 6

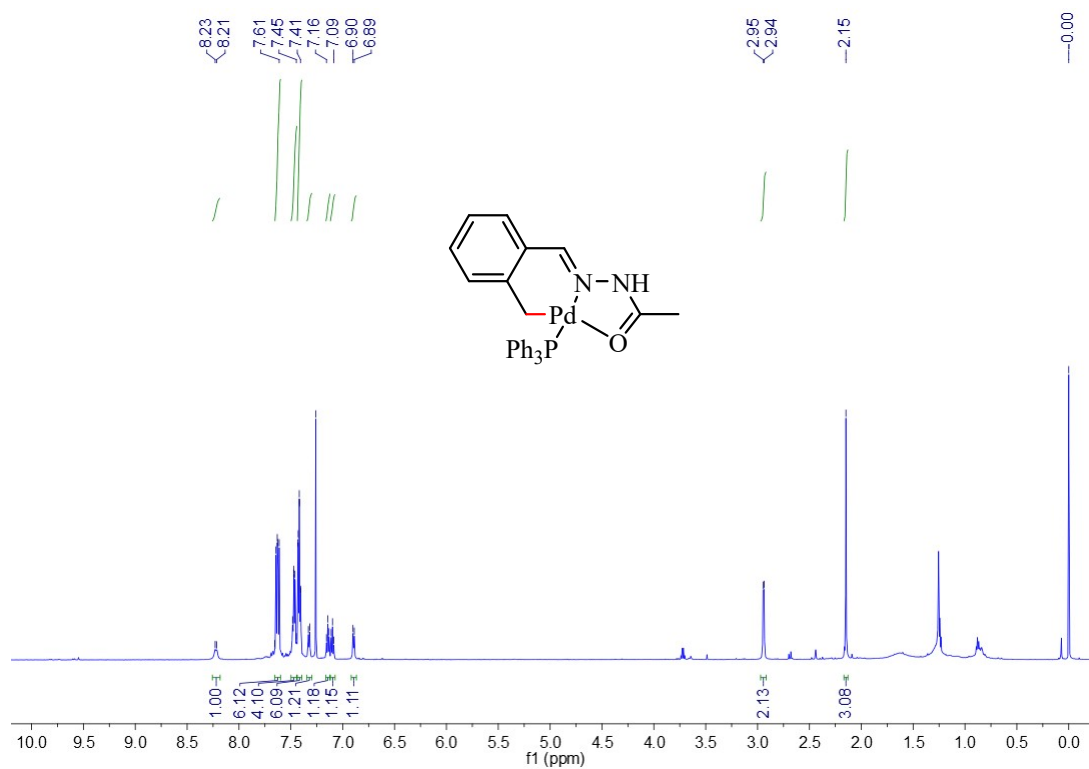

### <sup>13</sup>C NMR of Intermediate 6

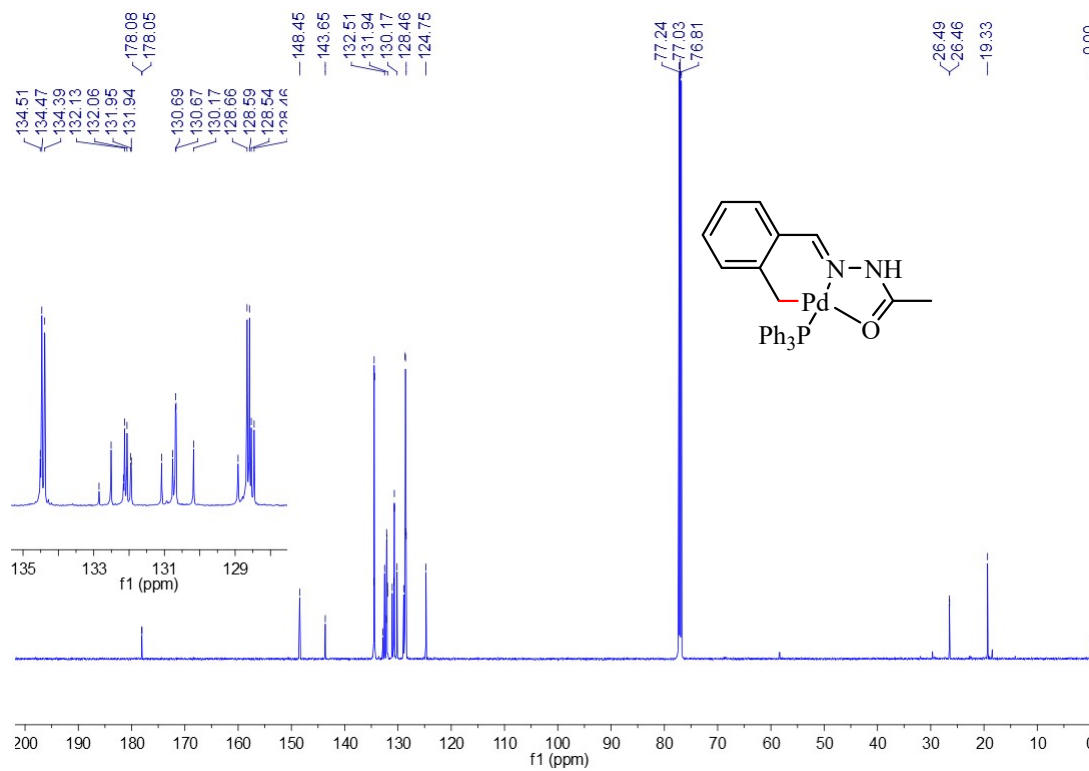

### HRMS(ESI) of Intermediate 6

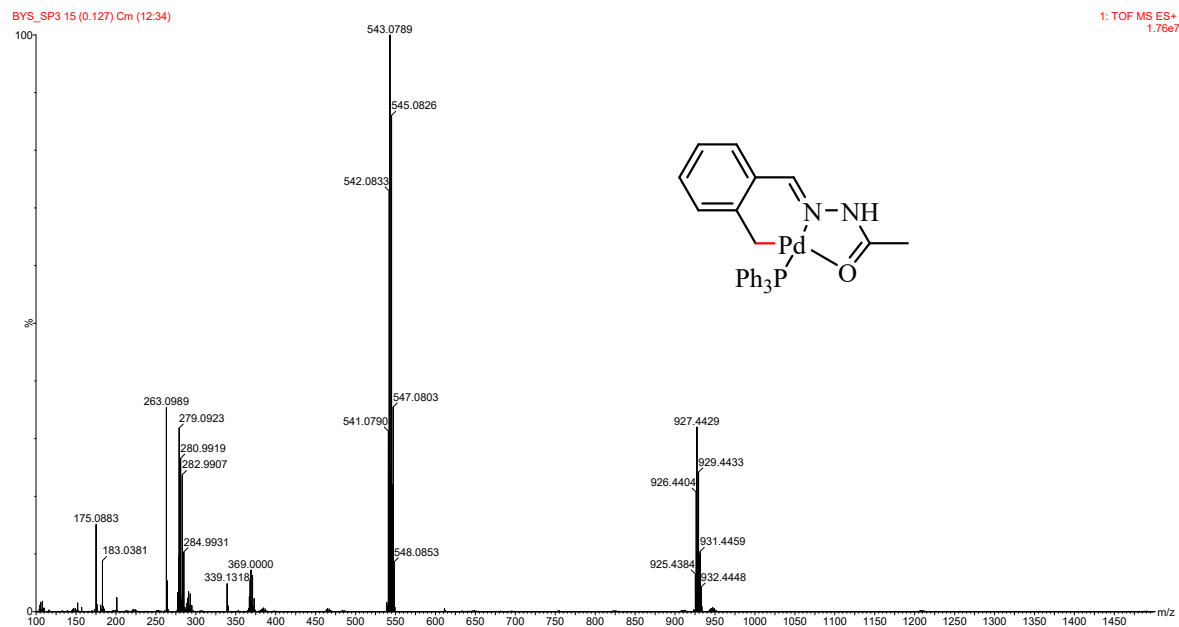

### <sup>1</sup>H NMR of Intermediate 7

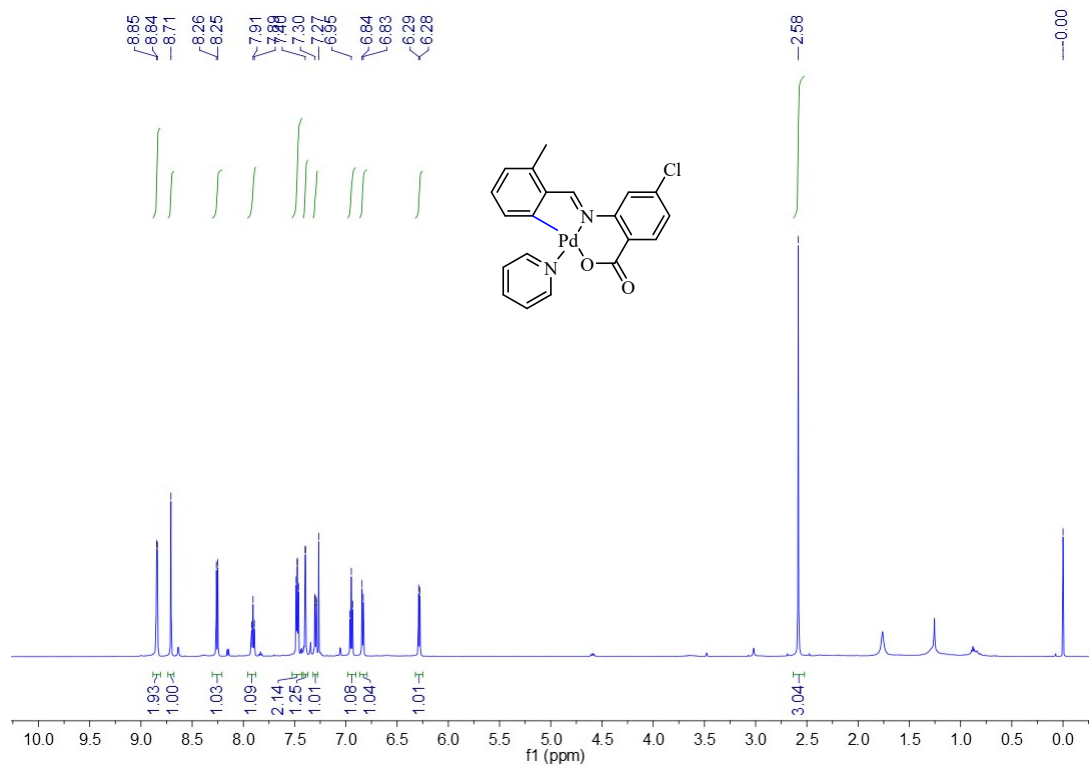

<sup>13</sup>C NMR of Intermediate 7

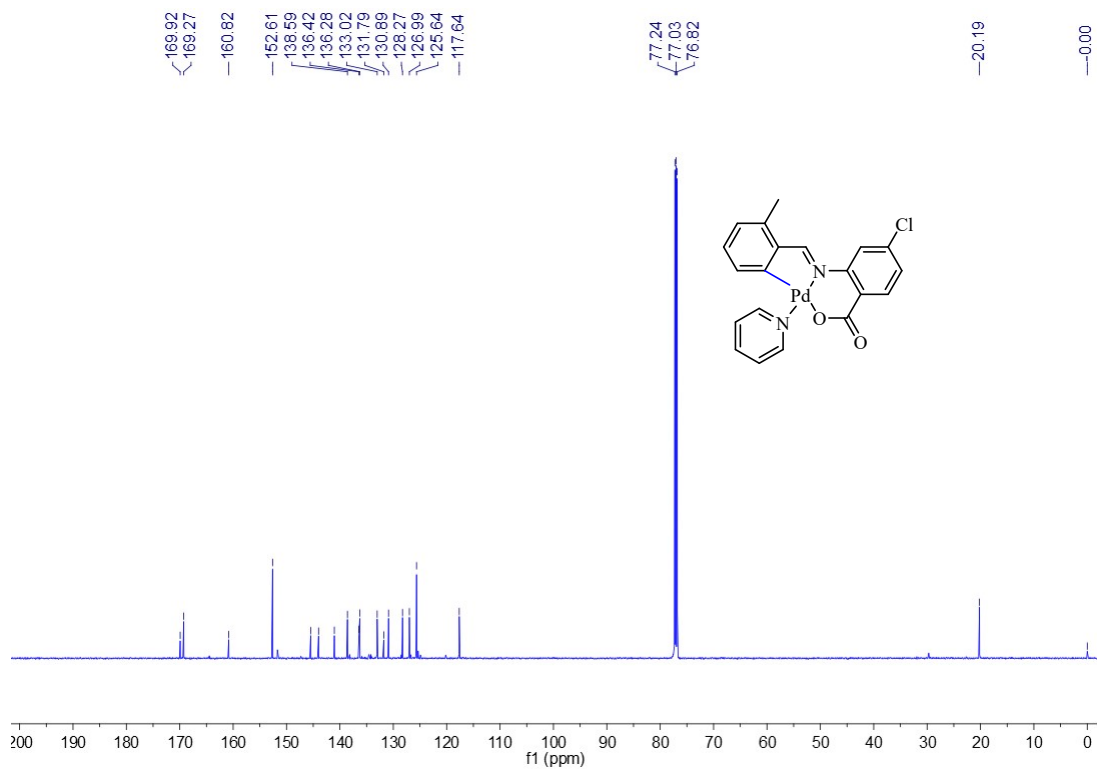

Supplement: d1qo00895a1.pdf [file d1qo00895a1.pdf]
